# Supplementary material for: Can a nurse-led community-based model of hypertension care improve hypertension control in Ghana? Results from the ComHIP cohort study
Source: PubMed Central journal article supplement — BMJ Open. 2019 Apr 2;9(4):e026799. doi: 10.1136/bmjopen-2018-026799 (PMC6500340; doi:10.1136/bmjopen-2018-026799), 2019-04-02
Supplement: bmjopen-2018-026799.draft_revisions.pdf [file bmjopen-2018-026799.draft_revisions.pdf]

# BMJ Open

BMJ Open is committed to open peer review. As part of this commitment we make the peer review history of every article we publish publicly available.

When an article is published we post the peer reviewers' comments and the authors' responses online. We also post the versions of the paper that were used during peer review. These are the versions that the peer review comments apply to.

The versions of the paper that follow are the versions that were submitted during the peer review process. They are not the versions of record or the final published versions. They should not be cited or distributed as the published version of this manuscript.

BMJ Open is an open access journal and the full, final, typeset and author-corrected version of record of the manuscript is available on our site with no access controls, subscription charges or pay-per-view fees (<http://bmjopen.bmj.com>).

If you have any questions on BMJ Open's open peer review process please email [info.bmjopen@bmj.com](mailto:info.bmjopen@bmj.com)

# BMJ Open

## Results from an innovative model of hypertension care: The ComHIP Cohort study

|                               |                                                                                                                                                                                                                                                                                                                                                                                                                                                                                                                                                                                                                                                                                                                                                                                |
|-------------------------------|--------------------------------------------------------------------------------------------------------------------------------------------------------------------------------------------------------------------------------------------------------------------------------------------------------------------------------------------------------------------------------------------------------------------------------------------------------------------------------------------------------------------------------------------------------------------------------------------------------------------------------------------------------------------------------------------------------------------------------------------------------------------------------|
| Journal:                      | <i>BMJ Open</i>                                                                                                                                                                                                                                                                                                                                                                                                                                                                                                                                                                                                                                                                                                                                                                |
| Manuscript ID                 | bmjopen-2018-026799                                                                                                                                                                                                                                                                                                                                                                                                                                                                                                                                                                                                                                                                                                                                                            |
| Article Type:                 | Research                                                                                                                                                                                                                                                                                                                                                                                                                                                                                                                                                                                                                                                                                                                                                                       |
| Date Submitted by the Author: | 02-Oct-2018                                                                                                                                                                                                                                                                                                                                                                                                                                                                                                                                                                                                                                                                                                                                                                    |
| Complete List of Authors:     | Adler, Alma; London School of Hygiene & Tropical Medicine, Department of Non-communicable Disease Epidemiology; Harvard Medical School<br>Laar, Amos; School of Public Health, University of Ghana, Department of Population, Family & Reproductive Health<br>Prieto-Merino, David; London School of Hygiene and Tropical Medicine, Department of Non-communicable Disease Epidemiology<br>Der, Reina; Family Health International<br>Mangortey, Debbie ; Family Health International<br>Dirks, Rebecca; Family Health International<br>Lamptey, Peter; London School of Hygiene & Tropical Medicine, Department of Non-communicable Disease Epidemiology<br>Perel, Pablo; London School of Hygiene and Tropical Medicine, Department of Non-Communicable Disease Epidemiology |
| Keywords:                     | Hypertension < CARDIOLOGY, cohort, EPIDEMIOLOGY                                                                                                                                                                                                                                                                                                                                                                                                                                                                                                                                                                                                                                                                                                                                |
|                               |                                                                                                                                                                                                                                                                                                                                                                                                                                                                                                                                                                                                                                                                                                                                                                                |

SCHOLARONE™  
Manuscripts

## Results from an innovative model of hypertension care: The ComHIP Cohort study

Alma J Adler<sup>12\*</sup>, Amos K Laar<sup>3\*</sup>, David Prieto-Merino<sup>1</sup>, Reina M. M. Der<sup>4</sup>, Debbie Mangorley<sup>4</sup>,  
Rebecca Dirks<sup>5</sup>, Peter Lamptey<sup>1</sup>, Pablo Perel<sup>1</sup>

\*Co-first authors

### Correspondence:

Dr. Alma J Adler

[alma.adler@lshtm.ac.uk](mailto:alma.adler@lshtm.ac.uk)

<sup>1</sup>Department of Non-communicable Disease Epidemiology. London School of Hygiene & Tropical Medicine. Keppel St, London. WC1E 7HT

<sup>2</sup>Department of Global Health and Social Medicine, Harvard Medical School. Boston, MA, United States

<sup>3</sup>Department of Population, Family, & Reproductive Health, School of Public Health, University of Ghana, LG 13, Legon, Accra, Ghana.

<sup>4</sup>Family Health International 360, Accra, Ghana

<sup>5</sup>Family Health International 360, Washington DC, United States.

Alma J Adler [alma.adler@lshtm.ac.uk](mailto:alma.adler@lshtm.ac.uk)

Amos K Laar [alaar@ug.edu.gh](mailto:alaar@ug.edu.gh)

David Prieto -Merino [david.prieto@lshtm.ac.uk](mailto:david.prieto@lshtm.ac.uk)

Reina M. M. Der [RDer@fhi360.org](mailto:RDer@fhi360.org)

Debbie Mangorley [DMangorley@fhi360.org](mailto:DMangorley@fhi360.org)

Rebecca Dirks [rdirks@fhi360.org](mailto:rdirks@fhi360.org)

Peter Lamptey [plamptey@fhi360.org](mailto:plamptey@fhi360.org)

Pablo Perel [pablo.perel@lshtm.ac.uk](mailto:pablo.perel@lshtm.ac.uk)

**Word count: 4435**

**Abstract:**

**Objectives:** to present an evaluation of the Community-Based Hypertension Improvement Project (ComHIP).

**Setting:** Lower Manya Krobo, Eastern Region, Ghana.

**Participants:** All adult hypertensive community members, except pregnant women, were eligible for inclusion in the study. We enrolled 1339 participants, 69% of which were female. 552 had a six-month visit, and 338 had a 12-month visit.

**Interventions:** Community based CVD nurses were trained by Family Health International (FHI360). CVD nurses confirmed diagnoses of known hypertensives and newly screened individuals. Participants were treated according to clinical guidelines established through the project's Technical Steering Committee.

**Primary outcome:** Hypertension control defined as blood pressure under 140/90 mm Hg. Secondary outcomes: Changes in blood pressure and knowledge of risk factors for hypertension.

**Results:** After one year of intervention 72% (95% CI 67%, 77%) of participants had their hypertension under control. Systolic BP was reduced by -12.2 mmHg (95%CI 14.4, -10.1) and diastolic BP by -7.5 mmHg (95%CI 9.9, 6.1). Factors associated with remaining in the programme for 12-months included education, older age, hypertension under control at enrollment, and enrollment date. The majority of patients who remained in the programme were on treatment, with two-thirds taking at least two medications

**Conclusions:** Patients retained in ComHIP had increased BP control. However, high loss to follow-up limits potential public health impact of these types of programmes. To minimize impact of externalities, programmes should include standard procedures and back-up systems to maximize the possibility that patients stay in the programme.

Keywords:

Hypertension, Ghana, Community based cohort study.

**STRENGTHS AND LIMITATIONS OF THIS STUDY**

- ComHIP is a large cohort study testing a community based model of hypertension care
- Trained community based cardiovascular nurses conducted screening, diagnosis and management of hypertension patients
- Patients were sent three types of SMS, daily reminders to take their medications, appointment reminders, and weekly health education messages
- Blood pressure was checked with a minimum of three serial readings at regular intervals, but at a minimum of 6-monthly intervals
- The study showed important reductions in blood pressure that require further replication

**INTRODUCTION:**

1  
2  
3 Globally, raised systolic blood pressure (SBP) is one of the greatest risk factors for disability (GBD,  
4 2017). Hypertension is generally considered to be the level of raised blood pressure (BP) where  
5 medications show a reduction in clinical events in randomized trials. This is generally accepted as  
6  $\geq 140$  SBP mmHg or  $\geq 90$  diastolic mmHg (DBP)[1].  
7

8 Evidence shows that lowering hypertensive individual's blood pressure with accessible drugs reduces  
9 the risk of further cardiovascular events; with a reduction in stroke by an estimated 35–40% and a  
10 myocardial infarction and heart failure reduced by 20–25% reduction [2-4]. Whilst average age-  
11 standardised BP is decreasing in most high-income countries, it is increasing in most low and middle  
12 income countries (LMICs) [5] with 32% to 50% of adults estimated to be hypertensive in sub-Saharan  
13 Africa [6].  
14

15 The Prospective Urban Rural Epidemiology (PURE) study showed that despite high levels of  
16 hypertension worldwide, only 34% of Africans are aware of their hypertension status, only 31.3%  
17 receive any treatment and only 6.5% have their blood pressure under control .[7] Our recent study  
18 of hypertension prevalence in the Lower Manya Krobo, Ghana, showed that only 2.1% of  
19 hypertensives had their blood pressure under control [8].  
20

21 Because of the great burden of hypertension in Sub-Saharan Africa and the poor rate of  
22 hypertension control, innovative methods for hypertension management are needed. Launched in  
23 2015, the Community-Based Hypertension Improvement Project (ComHIP) introduced an innovative  
24 model for hypertension control at the community level. ComHIP is a public-private partnership  
25 between the Ghana Health Service, FHI 360 and the Novartis Foundation.  
26  
27

28 The aim of ComHIP is to improve hypertension management and control in the Lower Manya Krobo  
29 district in the Eastern Region of Ghana. The programme includes six components (Supplementary  
30 Figure 1), aimed at increasing access to hypertension services at the community level. Screening in  
31 the community is provided by Cardiovascular Disease (CVD) nurses and Community Health Officers  
32 (CHOs), as well as through local private sector drug shops called licensed chemical sellers (LCS).  
33 Ongoing hypertension management is provided by CVD nurses or, for those with co-morbidities or  
34 severe conditions, at district hospitals. Patients are encouraged to routinely monitor their blood  
35 pressure by having their BP measured at a LCS. The various service providers are linked through a  
36 cloud-based system which revolve around bringing hypertension care into the community.  
37 Physicians, Community based CVD nurses, CHOs, and LCS staff were trained by FHI 360 to provide  
38 specific services. For instance, CVD nurses conduct hypertension screening, and confirmation of  
39 hypertension diagnosis, staging of degree of hypertension, assessment of other CVD risk factors,  
40 counselling, monitoring and follow up and trained LCS conduct community BP screening and  
41 awareness raising. Further information is found in the supplementary material.  
42  
43

44 CommCare is a vital component of ComHIP. It serves as a case management system, referral tool,  
45 and job aid for providers. The CommCare database is linked with a SMS platform to automatically  
46 send daily adherence reminders, weekly healthy living tips, and consultation and prescription refill  
47 reminders to enrolled patients. These messages are sent via text or voice SMS with four language  
48 choices. The programme is described in more detail elsewhere [8]. Briefly, through CommCare  
49 patients diagnosed with severe hypertension or co-existing conditions are automatically referred to  
50 a physician. All patients enrolled in ComHIP receive SMS daily for medication reminders, weekly for  
51 health education, and upon need for appointment and screening reminders. CommCare also  
52 provides a cloud based health records system that links patients' records with the SMS system. Due  
53 to operational problems, there was a break in service in CommCare that began on 12 May 2016 for a  
54 period of at least three months.  
55  
56  
57  
58  
59  
60

1  
2  
3 The ComHIP Programme is being independently evaluated by the University of Ghana School of  
4 Public Health and the London School of Hygiene & Tropical Medicine with a mixed method approach  
5 through a series of quantitative and qualitative studies. These studies include repeat cross-sectional  
6 surveys within the intervention and comparison districts to track overall awareness and prevalence  
7 of hypertension; a cohort of hypertensive persons included in ComHIP to assess hypertension  
8 control; a cost-effectiveness evaluation; a study to assess the level of patient-centeredness within  
9 the programme; and a qualitative assessment of ComHIP stakeholders. In this paper we report the  
10 results of the cohort study.  
11

## 12 13 14 **Objectives**

15  
16 The objective of this study was to evaluate the effectiveness of ComHIP for controlling hypertension  
17 in hypertensive patients enrolled into the ComHIP programme.  
18

## 19 20 21 **METHODS:**

### 22 **Study design**

23  
24 The study was a prospective cohort study which included all patients recruited into the ComHIP  
25 Programme.  
26

### 27 **Setting**

28  
29 The study was conducted in Lower Manya Krobo, a municipality in the Eastern region of Ghana. This  
30 is a peri-urban setting approximately two hours from the national capital, Accra with a population of  
31 approximately 89,246, of whom 84% live in urban areas .[9] Recruitment began October 2015 and  
32 ended in December 2016.  
33

### 34 **Participants**

35  
36 Patients were enrolled into the programme if 1) they were known hypertensives or 2) had an  
37 elevated blood pressure reading at any ComHIP screening. Any individual living in Lower Manya  
38 Krobo 18 years or older was eligible, except pregnant women. Community members were screened  
39 by CHOs, LCS, or CVD nurses, using Omron M6 BP monitors. The average of three serial readings  
40 was used to confirm hypertension diagnosis. Patients who were at risk of hypertension (SBP  $\geq 120$ ,  
41 but  $< 140$ ) were given health education. All patients with SBP  $\geq 140$  or DBP  $\geq 90$  were referred to a  
42 CVD nurse for diagnosis. Patients with SBP  $\geq 180$  or DBP  $\geq 110$  were enrolled and referred to the  
43 physician for urgent care. Patients that were considered to have severe hypertension, (SBP  $\geq 180$  or  
44 DBP  $\geq 110$  or SBP between 160 – 179 or DBP 100 – 109 with one or more risk factors, or any evidence  
45 of organ damage) were referred for management by a physician at one of the district hospitals, all  
46 other patients were managed by CVD nurses.  
47  
48

49 Hypertensive individuals were enrolled and followed for at least one year. All patient interactions  
50 (with LCS, CHOs, CVD nurses, community and hospital pharmacist and doctors) were recorded and  
51 uploaded through the CommCare platform. Patients were requested to present for appointments at  
52 the following intervals; monthly BP monitoring appointments, monthly, bi-monthly or quarterly  
53 review visits (depending on risk factors and personal factors); and six-monthly follow up  
54 assessments. Participants were recruited from October 2015 until December 2016, and followed  
55  
56  
57  
58  
59

1  
2  
3 through December 2017. Guidelines for patient visits can be found in the supplementary materials  
4 (Supplementary Table 1 and Supplementary Figure 2).

5  
6 All enrolled participants were treated based on clinical guidelines established through the project's  
7 Technical Steering Committee, which included senior members of the GHS. The treatment goal was  
8 to improve blood pressure of all patients to below 140/90mmHg. Participants were initiated onto  
9 drug therapy and supplemented with non-drug therapy (lifestyle modification including low salt  
10 diets, increased fruit and vegetable diet, reduction in alcohol consumption, smoking cessation and  
11 regular aerobic exercise) irrespective of their risk level. The decision to initiate a monotherapy or  
12 multiple drug therapy depended largely on the level at which the participants BP was above goal and  
13 the overall risk level of patients. Recommended drugs and dosages are found in supplementary  
14 Table 2. Patient's response to antihypertensive were reviewed every three months and modified  
15 based on recommended guidelines if required.  
16

### 17 18 **Variables**

19  
20 Main outcomes:

21  
22 The main outcomes of interest were hypertension control (<140/90), and changes in systolic and  
23 diastolic blood pressure. Because of the low follow up rate, we also used appointment at six  
24 months, and appointment at 12 months as outcomes of interest.  
25

26 Other variables:

27  
28 Other variables included demographic factors including age, gender and marital status; risk factors  
29 such as body -mass index (BMI), awareness of hypertension, having hypertension under control prior  
30 to enrolment, and having previous diagnoses of other heart diseases, and socioeconomic factors. A  
31 full list of variables is found in Table 1.  
32

### 33 **Data collection**

34  
35 Data were collected on blood pressure using standardised protocols. At six and 12 months forms  
36 were administered by health care providers to collect information on patient knowledge of risk  
37 factors for hypertension and health behaviours.  
38

39  
40 All data were collected and downloaded from the CommCare platform. Initially data was intended  
41 to be analysed from the patient knowledge/behaviour forms used at six-month and 12-month follow  
42 up appointments. Due to poor levels of follow up, any appointment between five and seven months  
43 after enrolment was used for the six-month appointment analysis, and any appointment between 11  
44 and 13 months after enrolment was used for the 12-month appointment analysis.  
45

### 46 **Sample size**

47  
48 This cohort study included all the patients recruited in the ComHIP programme and a specific sample  
49 size was not calculated. However, in the protocol we assumed that the total district population is  
50 about 90,000; about 30,000, of whom are adults, and about 36% [12000] are estimated to be  
51 hypertensive. Assuming that about 10% of the adults with hypertension in the district will be  
52 included in the ComHIP Programme we would have a cohort of 1,200 hypertensive patients.  
53  
54  
55  
56  
57  
58  
59  
60

1  
2  
3 We estimated that a cohort study of 1200 hypertensive patients would provide a power greater than  
4 90% (with an alpha error of 0.05) to detect a two-fold increase of control of hypertension (from 4%  
5 to 8%).

### 7 **Patient and Public Involvement**

8  
9 Community members, including community leaders, were first involved through a stakeholder  
10 workshop. In this workshop, community members shared their thoughts, knowledge, and concerns  
11 about health in general, NCD-related conditions, and access to healthcare. Furthermore, community  
12 members were made aware of the hypertension project planned to be initiated in their community.  
13 This information was considered in finalizing the design of the service delivery model and the  
14 development of prevention, education, and behaviour change messages.

15  
16 Patients were recruited into the project through free screening offered at 1) local drug shops, names  
17 Licensed Chemical Sellers; 2) Community Health Planning Service (CHPS) sites; or 3) Community  
18 pharmacies. There were community screening activities and radio programs through which  
19 community members were educated on the project and hypertension in general. In addition,  
20 ComHIP staff conducted annual stakeholder meetings to provide updates to community members  
21 on the project progress.

### 25 **Statistical methods**

26  
27 We recoded exposures to reduce the number of levels and of missing values: For all the previous  
28 diagnosis / awareness: We have coded “missing” or “not known” or “no answer” as 0, so that value 1  
29 always means “Patient knows of a previous diagnosis” while value 0 means anything else (patient  
30 does not know or answer is missing). Because there were few previous diagnoses of each specific  
31 event (MI, stroke, diabetes...) we created a variable with value 1 if any diagnosis was present and 0 if  
32 none was present.

33  
34 For education, we assumed that those that did not know (48) or did not respond (26) did not have  
35 previous formal education (the largest group). We then grouped education in 4 levels: 1) no formal  
36 education, 2) primary (completed or not) 3) secondary (completed or not) and 4) higher (university)

37  
38 For marital status, we made 4 categories: 1) Never married 2) married or cohabiting 3) separated or  
39 divorced 4) widowed.

40  
41 We described the distribution of each variable at baseline, six-months and 12-months follow up,  
42 although comparisons cannot be done directly due to the large number of individuals that did not  
43 have follow up. To study what variables might affect the patient staying for 12-months in the  
44 programme we ran a logistics regression for the binary outcome variable: “patient had 12-month  
45 visit (Y/N)”. To consider the loss to follow up (patterns of visits), we separated the individuals into  
46 four different groups: (A) those individuals that did not come to any follow up visit, (B) those that  
47 came only to the 6-month visit, (C) those that came only to the 12-month visit, and (D) those that  
48 came to both follow up visits.

49  
50 We described the absolute values of blood pressure (SBP and DBP), the proportion of patients with  
51 blood pressure under control and the distribution of hypertension stages for each of these groups in  
52 each of the visits. We estimated the average changes of blood pressure for each group at each  
53 follow up visit and we compared the changes between groups with Student’s t-tests. We compared  
54 the mean of SBP and DBP between the groups with ANOVA models. To compare the proportion of  
55



patients with HT control or the distribution of hypertension stages between groups we used chi-square tests. To test the changes of variables within groups we used paired t-tests for continuous variables and marginal homogeneity tests for categorical variables.

### Ethical Approval

Ethical approval was granted by the Institutional Review Boards (IRBs) of LSHTM (LSHTM Ethics Ref: 10,152), the Ghana Health Service (ID NO. GHS-ERC 04/01/15), and the University of Ghana at Noguchi Memorial Institute for Medical Research (Ethics clearance # IRB00001276). Written informed consent was obtained from all participants.

### RESULTS:

#### Participants:

A total of 18,339 individuals 18 years and over were screened , 4118 referred to CVD nurses to confirm diagnosis, and of those 1339 were enrolled (76 (5.7%) low risk Grade 1 BP which is SBP 140 – 159 or DBP 90 – 99 without any target organ damages (TODs), co-morbidities or  $\geq 2$  risk factors), 559 (41.7%) (Moderate risk (SBP 160-179 or DBP 100 – 109 without any TODs, co-morbidities or  $\geq 2$  risk factors or Grade 1 BP with TODs, co-morbidities or  $\geq 2$  risk factors), and 704 (52.6%) High risk (Grade 3 which is SBP  $\geq 180$  or DBP  $\geq 101$  without any TODs, co-morbidities or  $\geq 2$  risk factors or Grade 2 BP with TODs, co-morbidities or  $\geq 2$  risk factors).

#### General characteristics of the cohort

The average age of the cohort was 58 years. Everyone was enrolled into the cohort by CVD nurses. Of the 1,339 people enrolled in the cohort, 24% were referred to ComHIP by LCS, 45% were referred by CHO, 23% were referred by CVD nurses, 3% were through physicians, and 5% were referred through other channels. 69% of the cohort was female, 31% male. Other characteristics of people enrolled in the cohort are found in Table 1.

Table 1. Characteristics of participants in the study at baseline.

| Characteristic     | % all | % 6 months | %12 months |
|--------------------|-------|------------|------------|
| <b>Number</b>      | 1339  | 552        | 338        |
| <b>Referred by</b> |       |            |            |
| LCS                | 23.9  | 23.4       | 24.3       |
| CHO                | 45.0  | 40.8       | 38.5       |
| CVD Nurse          | 23.3  | 25.4       | 26.9       |
| Other              | 7.8   | 10.5       | 10.4       |
| <b>Sex</b>         |       |            |            |
| Male               | 30.8  | 32.3       | 30.7       |
| Female             | 69.2  | 67.8       | 69.3       |
| <b>Age class</b>   |       |            |            |
| 30-44              | 17.9  | 14.7       | 13.6       |
| 45-54              | 23.5  | 21.7       | 24.3       |
| 55-64              | 27.3  | 31.9       | 32.0       |

|                                     |       |       |       |
|-------------------------------------|-------|-------|-------|
| 65+                                 | 31.4  | 31.7  | 30.2  |
| <b>hypertension stage</b>           |       |       |       |
| Normal                              | 26.4  | 38.6  | 41.7  |
| Stage I                             | 39    | 39.9  | 39.4  |
| Stage II                            | 19.6  | 14.5  | 13.0  |
| Stage III                           | 14.9  | 7.1   | 5.9   |
| <b>Mean BP</b>                      |       |       |       |
| DBP                                 | 90.8  | 87.6  | 86.9  |
| SBP                                 | 149.0 | 143.3 | 141.2 |
| <b>Education</b>                    |       |       |       |
| No formal education                 | 31.5  | 27.2  | 27.5  |
| Less than Primary                   | 15.4  | 16.1  | 17.8  |
| Completed Primary                   | 26.3  | 27.0  | 27.8  |
| Completed secondary                 | 16.1  | 18.5  | 14.8  |
| Completed university                | 1.1   | 4.7   | 5.9   |
| Completed other tertiary            | 4     | 1.5   | 2.4   |
| Other or no response                | 5.6   | 5.1   | 3.9   |
| <b>Ethnicity</b>                    |       |       |       |
| Akan                                | 4.2   | 28.6  | 21.4  |
| Dangme                              | 69.5  | 42.2  | 26    |
| Ewe                                 | 22    | 39.3  | 22.4  |
| Other or don't know                 | 4.3   |       |       |
| <b>Religion</b>                     |       |       |       |
| Christian                           | 96    | 97.6  | 97.9  |
| Muslim                              | 3.2   | 1.5   | 1.2   |
| Traditional                         | 0.5   | 0.4   | 0.3   |
| None                                | 0.3   | 0.5   | 0.6   |
| <b>Marital status</b>               |       |       |       |
| Never married                       | 5.7   | 5.1   | 3.6   |
| Married/Cohabiting                  | 54.4  | 54.7  | 57.7  |
| Separated/Divorced                  | 5.5   | 14.1  | 15.4  |
| Widowed                             | 26.1  | 25.9  | 23.1  |
| no response                         | 0.2   | 0.2   | 0.3   |
| <b>Household income</b>             |       |       |       |
| Less than 728 GHC                   | 18.7  | 17.0  | 17.2  |
| 728-1020 GHC                        | 17.4  | 20.8  | 19.8  |
| 1021-1098                           | 6.4   | 5.3   | 6.5   |
| 1099-1263                           | 5.0   | 4.9   | 4.7   |
| More than 1263 GHC                  | 12.3  | 11.1  | 11.8  |
| Don't know/no response              | 40.2  | 40.9  | 39.9  |
| <b>Aware of hypertension status</b> |       |       |       |
| Never had BP measured               | 18.7  | 17.6  | 16.3  |
| Was not aware                       | 12.9  | 11.4  | 10.7  |
| Aware                               | 68.5  | 70.8  | 73.1  |
| <b>Taking treatment</b>             |       |       |       |
| Never diagnosed                     | 31.5  | 29.2  | 26.9  |

|              |      |      |      |
|--------------|------|------|------|
| No treatment | 18   | 15.0 | 16.0 |
| Treatment    | 50.3 | 55.6 | 56.8 |
| Don't know   | 0.2  | 0.2  | 0.3  |
| <b>BMI</b>   |      |      |      |
| Underweight  | 5.4  | 4.9  | 5.0  |
| Normal       | 43.7 | 44.8 | 43.2 |
| Overweight   | 29.2 | 30.1 | 32.5 |
| Obese        | 21.7 | 20.3 | 19.2 |

\*All hypertensive patients enrolled in cohort

\*\*Hypertensive patients with six-month appointment/follow up

\*\*Hypertensive patients with a twelve-month appointment/follow up

Other risk factors:

5.4% of the sample was underweight, 43.7% was normal, 29.2% was overweight and 21.7% was obese. The mean BMI at enrolment in the cohort was 26.1 (95% CI 25.82, 26.4).

We did not analyse smoking, cholesterol or diabetes as only 1% of the sample were smokers, 3.5% reported having had a previous cholesterol test, and only 28% had a previous diabetes test.

Blood Pressure at enrolment

The average SBP was 147.2 (SD 22.1) mmHg, and average DBP was 89.9 (SD 13.3) mmHg. At enrolment 917 (68.5%) had a previous diagnosis of hypertension, of which 654 (71.3%) were already taking some anti-hypertensives, and 297 (32.4%) had their blood pressure under control.

Blood pressure management

Of the 1339 enrolled in the study, 712 (53.2%) did not come for a follow up (group A), 289 (21.6%) had only a six-month visit (group B), 75 (5.6%) had only the 12-month visit (group C) and 263 (19.6%) had both visits (group D). In total only 552 (41%) had a six month follow up appointment, and only 338 (25%) had a 12 month follow up appointment.

Loss to follow up and Characteristics of those who stayed in the study

Patients with their hypertension already under control were more likely to present for care. The variable that showed the greatest association with likelihood of having a six or twelve-month appointment was enrolment month. Participants who enrolled earlier were much more likely to stay in the programme than those who enrolled later (Table 1)

Multivariate analysis suggested that recruitment before 12 May 2016 (one year before the break in service), age, education and hypertension under control in the first visit showed significant associations with having a twelve-month appointment. Recruitment after 12 May 2016 reduced the

1  
2  
3 chances of coming to further visits, the older the patient and the higher the education level, the  
4 higher the chances that the patient would come to the follow up visits. Patients with controlled HT  
5 at enrolment were nearly twice as likely to come to follow up visits. None of the other variables  
6 showed significant associations (Table 2).  
7  
8  
9  
10  
11  
12  
13  
14  
15  
16  
17  
18  
19  
20  
21  
22  
23  
24  
25  
26  
27  
28  
29  
30  
31  
32  
33  
34  
35  
36  
37  
38  
39  
40  
41  
42  
43  
44  
45  
46  
47  
48  
49  
50  
51  
52  
53  
54  
55  
56  
57  
58  
59  
60

For peer review only

Table 2) multivariate analysis of baseline characteristics associated with staying in the programme 12 months

|                                              | OR   | 95% CI       | P value          |
|----------------------------------------------|------|--------------|------------------|
| Enrolled year prior to break                 | 0.46 | (0.35, 0.60) | <b>0.00</b>      |
| Sex                                          | 0.88 | (0.63, 1.24) | 0.48             |
| Age (one year increments)                    | 1.01 | (1.00, 1.02) | <b>0.03</b>      |
| BMI                                          | 1.00 | (0.97, 1.02) | 0.90             |
| Edu. reference category: no formal education |      |              |                  |
| Primary education                            | 1.41 | (1.03, 1.93) | <b>0.03</b>      |
| Secondary Education                          | 1.13 | (0.73, 1.73) | 0.59             |
| Higher education                             | 2.42 | (1.33, 4.43) | <b>0.004</b>     |
| Reference cat: Never married                 |      |              |                  |
| Married/cohabitating                         | 1.77 | (0.90, 3.48) | 0.10             |
| Separated/Divorced                           | 1.86 | (0.90, 3.87) | 0.10             |
| Widowed                                      | 1.27 | (0.61, 2.64) | 0.52             |
| Household size                               | 1.01 | (0.95, 1.07) | 0.69             |
| Hypertension control                         | 1.93 | (1.47, 2.54) | <b>&lt;0.001</b> |
| Awareness of hypertension                    | 1.00 | (1.00, 1.00) | 0.97             |
| Hypertension treatment                       | 1.00 | (0.99, 1.00) | 0.33             |
| Any other previous diagnosis                 | 0.86 | (0.69, 1.07) | 0.18             |
| Confidence in management of hypertension     | 1.00 | (1.00, 1.01) | 0.63             |

### Changes in Blood Pressure

Because 12 month follow up was below 30%, we did not look at overall changes in blood pressure, but we did look at overall changes in blood pressure in those that remained in the study at six and twelve months.

On average, patients who enrolled and presented for a follow-up appointment at around six months, there was a 10.3 mmHg reduction in SBP (95% CI -12.0,-8.6) and a 6.3mmHg reduction in DBP (95% CI -7.2, -5.2) (Table 3). This was greater for all those who had a follow up appointment at one year, when there was a 12.2 mmHg reduction (95% CI -14.4, -10.1) in SBP and a 7.5 mmHg (95% CI 9.9, 6.1) reduction in DBP after one year in the programme (Table 3).

Table-3) Changes in BP means and hypertension control by patterns of visits.

| Groups        | N    | Vis. | SBP          |                       | DBP         |                     | HT Control       |
|---------------|------|------|--------------|-----------------------|-------------|---------------------|------------------|
|               |      |      | Mean (SE)    | Mean dif. (95%CI)     | Mean (SE)   | Mean dif. (95%CI)   | % (95% CI)       |
| All patients  | 1339 | E    | 147.2 (0.60) |                       | 89.9 (0.36) |                     | 31% [29% , 34%]  |
|               | 552  | 6m   | 132.9 (0.80) | -10.3 [-12.0 , -8.6]  | 81.3 (0.47) | -6.3 [-7.3 , -5.2]  | 69% [65% , 73%]  |
|               | 338  | 12m  | 128.9 (1.05) | -12.2 [-14.4 , -10.1] | 79.4 (0.61) | -7.5 [-8.9 , -6.1]  | 72% [67% , 77%]  |
| (A) No visits | 712  | E    | 150.4 (0.85) |                       | 91.7 (0.49) |                     | 25% [21% , 28%]  |
| (B) Only 6m   | 289  | E    | 146.4 (1.28) |                       | 89.0 (0.77) |                     | 34% [29% , 40%]  |
|               |      | 6m   | 135.7 (1.15) | -10.1 [-13.2 , -8.1]  | 82.7 (0.68) | -6.3 [-7.8 , -4.8]  | 61% [55% , 67%]* |
| (C) Only 12m  | 75   | E    | 145.9 (2.62) |                       | 90.2 (1.63) |                     | 36% [25% , 48%]  |
|               |      | 12m  | 132.5 (2.56) | -13.5 [-18.5 , -8.6]  | 81.0 (1.38) | -9.2 [-12.4 , -6.0] | 71% [59% , 81%]* |
| (D) 6 & 12m   | 263  | E    | 139.8 (1.18) |                       | 86.1 (0.80) |                     | 43% [37% , 50%]  |
|               |      | 6m   | 129.8 (1.08) | -10.0 [-12.2 , -7.7]  | 79.8 (0.63) | -6.3 [-7.8 , -4.8]  | 77% [72% , 82%]* |
|               |      | 12m  | 127.9 (1.13) | -11.9 [-14.3 , -9.5]  | 79.0 (0.67) | -7.1 [-8.6 , -5.5]  | 72% [66% , 78%]* |

\* The comparison of these intervals with enrolment visit of the same group produce all p-values <0.0001

E= enrolment

There was also a significant reduction in hypertension stage, with a lower percentage of hypertensive individuals having stage III hypertension over time (Table 4).

Table 4) Distribution of Hypertension Stage in each group in each visit.

The P-values are extracted from: (1) Chi-square tests to compare that row with group A of no follow-up. (2) from marginal homogeneity tests comparing the distribution of the same group in enrolment visit.

| Groups by patterns of visits | N     | Visit | No HT | Mild  | Moderate | Severe | P-value     |
|------------------------------|-------|-------|-------|-------|----------|--------|-------------|
| All patients                 | 1,339 | 1m    | 31.0% | 39.0% | 18.4%    | 11.6%  |             |
|                              | 552   | 6m    | 68.7% | 19.7% | 9.4%     | 2.2%   | < 0.001 (2) |
|                              | 338   | 12m   | 71.9% | 19.5% | 6.5%     | 2.1%   | < 0.001 (2) |
| (A) No follow-up             | 712   | 1m    | 24.6% | 38.7% | 21.5%    | 15.2%  |             |
| (B) Only 6m visit            | 289   | 1m    | 34.3% | 39.4% | 17.0%    | 9.3%   | 0.002 (1)   |
|                              | 289   | 6m    | 60.9% | 24.2% | 12.1%    | 2.8%   | <0.001 (2)  |
| (C) Only 12m visit           | 75    | 1m    | 36.0% | 36.0% | 17.3%    | 10.7%  | 0.167 (1)   |
|                              | 75    | 12m   | 70.7% | 14.7% | 10.7%    | 4.0%   | < 0.001 (2) |
| (D) 6 & 12m visit            | 263   | 1m    | 43.4% | 40.3% | 11.8%    | 4.5%   | <0.001 (1)  |

|  |     |     |       |       |      |      |             |
|--|-----|-----|-------|-------|------|------|-------------|
|  | 263 | 6m  | 77.2% | 14.8% | 6.5% | 2.2% | < 0.001 (2) |
|  | 263 | 12m | 72.3% | 20.9% | 5.3% | 1.5% | < 0.001 (2) |
|  |     |     |       |       |      |      |             |

### Awareness

Overall awareness of hypertension status in the overall cohort was 68.5% at enrolment. Individuals who stayed in the programme longer, were more likely to be aware of their hypertension status. 70.8% of individuals who stayed in the programme for six months were aware of their hypertension status, and 73.1% of those who stayed in the programme for 12 months were aware of their hypertension status (Table 1).

### Treatment

Treatment increased between enrolment and six and twelve-month appointments. Although only 44.2% of patients were receiving any medication at enrolment, the majority were being treated at six months (90.4%) and at 12 months (92.2%). At enrolment, the majority of patients who were on treatment were taking a calcium channel blocker (CCB) (36% of all patients), but at six months the majority were on diuretics (75.9%) followed by a CCB (69.5%). The same pattern was found at 12 months with 79.8% taking diuretics, and 71.5% taking a CCB (Table 5)

In patients who had a six-month appointment, 24.1% were taking only one medication, 32% were taking two medications, and over 30% were taking more than two medications. In patients who had a 12-month appointment, 23 % were taking one medication, 32.6% were taking two medications, and over 32% were taking more than two medications.

Table 5) treatment pattern in the cohort at enrolment, six months and 12 months with p-values for differences.

| Treat        | Enrolment | 6 month | P change | 12 months | P change |
|--------------|-----------|---------|----------|-----------|----------|
| Diuretic     | 21.66%    | 75.89%  | 0.00000  | 79.83%    | <0.00001 |
| Calcium CB   | 36.07%    | 69.46%  | 0.00000  | 71.47%    | <0.00001 |
| Beta-blocker | 3.14%     | 8.93%   | 0.00000  | 9.51%     | 0.00001  |
| Angiotensin  | 6.72%     | 22.5%   | 0.00000  | 21.61%    | <0.00001 |
| ARB          | 2.54%     | 12.5%   | 0.00000  | 13.54%    | <0.00001 |
| Other        | 3.66%     | 15.89%  | 0.00000  | 17.87%    | <0.00001 |
| Any          | 44.29%    | 90.36%  | 0.00000  | 92.22%    | <0.00001 |

|               |        |        |         |        |          |
|---------------|--------|--------|---------|--------|----------|
| 0 medications | 55.71% | 9.64%  | 0.00000 | 7.78%  | <0.00001 |
| 1 medications | 19.42% | 24.11% | 0.21013 | 23.05% | 0.62722  |
| 2 medications | 20.46% | 31.96% | 0.00040 | 32.56% | 0.00811  |
| 3 medications | 4.18%  | 23.93% | 0.00000 | 24.78% | <0.00001 |
| 4 medications | 0.22%  | 6.96%  | 0.00000 | 8.07%  | <0.00001 |
| Mean          | 0.74   | 2.05   | 0.00000 | 2.14   | <0.00001 |

### *Control*

There was an increase in blood pressure control in patients who remained in the programme (Table 3), however patients who stayed in the programme were more likely to have their BP under control upon enrolment. In the group of patients that did not have a second appointment (group A) the baseline BP control was 25% while in the other groups (B, C, D) was 34%, 36% and 43% respectively. These differences were statistically significant (Table 4). The BP control increased to 69% (95% CI 65%- 73%) in the individuals that visited at six months. In the patients that had the 12 month visit the control increased to 72% (95% CI 67%, 77%). Of patients who had both a six and 12-month follow-up appointment, the control increased to 77% (95% CI 72%-82%) at six months, but slightly decreased to 72% at 12 months (95% CI 66%-78%) (Table 3, Table 4).

## **DISCUSSION**

### **Summary of results**

Of the 1339 patients enrolled in ComHIP, only 552 (41%) had a follow up appointment at six months, and only 338 (25.2%) had a follow up appointment at twelve months. Participants who had more education, were older, had their hypertension under control at enrolment, or who had the opportunity to spend at least a year in the programme before the break in service were more likely to attend appointments at six and/or twelve months.

Among the group of patients who continued in the programme for six or twelve months, we found strong evidence of a reduction in DBP and SBP, and an increase (from under half to more than two thirds) of hypertension control. We also found strong evidence of an increase of the patients under treatment, of the number of medications received per patient, and a decrease in the number of individuals with severe hypertension.

### **Comparison with other studies**

Other studies evaluating task sharing for hypertension management have shown modest levels of success. For example, one randomised controlled study conducted in Ghana using task sharing (but with supplying free medications) showed greater reductions in SBP in patients randomised to the arm that included trained nurses, as compared to the one that just provided free medications and health insurance [10].



1  
2  
3 The poor follow-up reported in our study is not unexpected. Many studies have shown poor levels of  
4 follow up or adherence to clinic appointments. In one study conducted in three primary care clinics  
5 in Kibera, Kenya between 2010 and 2012, 1465 hypertensive or diabetic patients were identified. Of  
6 these 31% of patients were lost to follow up. Of these 55% of non-diabetic patients had their BP  
7 under control by 24 months, but only 28% of diabetic patients [11].  
8

9 In another study conducted in Kibera, Kenya between 2015 and 2016, 3861 hypertensive patients  
10 were identified in health centres or clinics. of those 3069 patients did not complete six months of  
11 follow up (79%). Of those patients who remained in the programme over 6 months, they found 63%  
12 adherence to appointments [12].  
13

14 In a study conducted in the slums of Nairobi only 3.4% of participants showed completed compliance  
15 with the programme. 30% only showed up for one appointment, and 5% only had two visits. Similar  
16 to our study they found that patients who remained in the programme showed significant  
17 reductions in SBP and DBP [13].  
18

19 In a study done in two sites (one rural and one urban) in Malawi, of 4075 patients referred for  
20 clinical care, only 61% attended their referral appointments. Of those 47% of hypertensive patients  
21 were still in contact after 24 months. Similar to our findings, they found uptake in care to be higher  
22 in older patients, being on anti-hypertensives prior to enrolment, and not being in employment.  
23 Unlike our study, they found that females were more likely to be retained in care .[14]  
24

25 Similarly, a study of hypertensive and diabetic patients in rural Cameroon found that only 18.1% of  
26 participants were still in care after one year. However similar to our study they found significant  
27 decreases in SBP and DBP in hypertensive patients with at least two documented visits.  
28  
29

### 30 31 **Strengths and Limitations** 32

33 A major strength of this study is unlike most other hypertension programmes ComHIP uses existing  
34 GHS protocols and medications and does not require outside funds or intervention for medications.  
35 This means that there is a much greater chance of long term sustainability of the programme as it  
36 does not rely on outside sources for medications.  
37

38 Limitations of the study include that data were only available for encounters with service providers  
39 within the ComHIP network. Any appointments with doctors, pharmacists (licensed or un-licensed)  
40 that were not part of ComHIP would not have been registered, so it is possible that patients were  
41 obtaining anti-hypertensives from non-licensed sellers, which would not be captured in the ComHIP  
42 database. Another limitation of ComHIP was that the cohort did not have a control.  
43  
44

45 Due to the extremely poor follow-up, it is not possible to generalise our findings regarding the  
46 impact on blood pressure control to other studies, other than to emphasize the importance of  
47 effective strategies to promote follow-up. Finally, it is important to remember that nearly 70% of the  
48 initial cohort was aware of their hypertension status and about half were taking medications, which  
49 is a much higher proportion than in the general population. While this was done in ComHIP to  
50 ensure access to hypertension management to community members who otherwise would not have  
51 been able to access services, it is an important consideration when considering generalisability to  
52 the overall population.  
53

### 54 **Interpretation** 55 56 57 58 59 60

1  
2  
3 In the 25% of people who had a 12-month appointment, there was strong evidence of an increase of  
4 the patients receiving medications, the average number of medications received per patient, and the  
5 level of hypertension control, we also found a reduction in both BP and hypertension status.  
6 However, like most other studies in the region, the high loss to follow up highlights that innovative  
7 hypertension programmes such as ComHIP need to develop better ways to retain patients within the  
8 programme.  
9

10 Community based hypertension programmes in resource poor setting often are complex to carry  
11 out, and are prone to poor follow-up. There are many possible reasons that follow up in our study  
12 was low.  
13

14 The factor most associated with retention in the programme was enrolment date. This is significant  
15 as due to operational issues, there was gap of CommCare utilization for three months. Anecdotally  
16 FHI 360 ComHIP staff learned that this gap in CommCare service had caused both service providers  
17 and staff to believe that the intervention had stopped, which may have resulted in a low rate of  
18 completion of follow-up appointments. Considering difficulties associated with community based  
19 studies in low resource settings, it is imperative to ensure continuity of service. Other factors that  
20 could cause this association may be health care professional fatigue; engaging patients to present  
21 for appointments may require considerable effort, such as multiple phone calls and personal  
22 interaction, for which the CVD nurses did not receive additional monetary compensation. It is  
23 possible that over time, the enthusiasm of the CVD nurses for the intervention may have waned.  
24 Also, as in any low – resource settings, there is a great deal of workforce turnover, FHI 360  
25 recognised this early in the implementation and trained extra staff to bridge the gaps, however it is  
26 still possible that new health care providers who replaced them may not have had the same level of  
27 training. A complementary component of the evaluation which includes qualitative research with  
28 different ComHIP stakeholders is underway to analyse in depth the possible reasons that may have  
29 caused people to not adhere to the programme. (see Adler et al Barriers and facilitators to the  
30 implementation of a community-based hypertension improvement project in Ghana: A qualitative  
31 study and Laar et al Health system challenges to hypertension and related non-communicable  
32 diseases prevention and treatment: perspectives from Ghanaian stakeholders)  
33  
34  
35

36 Lastly, our study found that older individuals were more likely to continue in care, this was found in  
37 at least one other study[14] but was not reported on in most studies. This could be because older  
38 patients may have more time to attend clinics. Patients with their hypertension under control were  
39 about twice as likely to stay in the programme. This is not surprising as they had already exhibited  
40 better health seeking behaviours.  
41  
42

### 43 **Recommendations:**

44 For patients enrolled and who continued in the programme we found an important impact on the  
45 management of hypertension and in blood pressure control. However, the high loss to follow-up of  
46 patients recruited limits the potential public health impact of these types of programmes. In order to  
47 minimize the impact of externalities (such as the CommCare service gap in ComHIP) programmes  
48 should have standard procedures and back-up systems to maximize the possibility that patients stay  
49 in the programme, particularly younger and less educated individuals. Also, appropriate incentives  
50 should be put in place to keep programme staff fully engaged and avoid programme fatigue. Future  
51 studies should further identify causes of loss to follow-up and find effective ways to adapt  
52 programmes accordingly (e.g. access to treatment within the community, targeted behaviour change  
53 messaging) to ensure that most of patients recruited stay long term in the programme.  
54  
55  
56  
57  
58  
59  
60

### Acknowledgements

Funding for ComHIP was generously provided by the Novartis Foundation, Basel, Switzerland. We are grateful to all of cohort clients. We are also grateful to the leadership and political support of the Ghana Health Service (both from the national and district levels) for their support.

### Competing interests

Co-authors PL, AKL, PP, AJA, and DP-M worked on the ComHIP Programme for which their institutions (LSHTM and UGSPH) have received grants from the Novartis Foundation. Co-authors RD, RD, and DM are staff of the FHI360, which provided technical direction to ComHIP implementation.

### Authors' contributions

PL conceived of the project, PL and RD designed the interventions. PL, PP, AKL and AJA designed the research component of the project. DM, and RMMD supervised the implementation of the programme. RMMD is the programme data manager. AJA and DP-M performed the statistical analyses. AJA drafted the manuscript, with inputs from all authors. All authors read and approved the final version of the manuscript.

### Consent to publish

Participants' consent was obtained for the purposes of publishing the results from the study. All the authors consented to the study results to be published in the form presented in the final version of this manuscript.

### Data sharing

Summary statistics related to the dataset used in the project are available by request

### Funding

Funds for the project was made available by Novartis Foundation, Basel, Switzerland. They did not have any input or control over this manuscript.

### Figures

See attached supplementary file

### REFERENCES

1. WHO, *World Health Organization-International Society of Hypertension Guidelines for the Management of Hypertension. Guidelines Subcommittee*. Am J Hypertens, 1999. **17**(2): p. 151-83.
2. Collaboration, B.P.L.T.T., *Effects of blood pressure lowering on cardiovascular risk according to baseline body-mass index: a meta-analysis of randomised trials*. The Lancet, 2015. **385**(9971): p. 867-874.
3. Collins, R., et al., *Blood pressure and coronary heart disease*. Lancet, 1990. **336**(8711): p. 370-1.
4. Law, M.R., J.K. Morris, and N.J. Wald, *Use of blood pressure lowering drugs in the prevention of cardiovascular disease: meta-analysis of 147 randomised trials in the context of expectations from prospective epidemiological studies*. Bmj, 2009. **338**: p. b1665.

- 1
  - 2
  - 3
  - 4
  - 5
  - 6
  - 7
  - 8
  - 9
  - 10
  - 11
  - 12
  - 13
  - 14
  - 15
  - 16
  - 17
  - 18
  - 19
  - 20
  - 21
  - 22
  - 23
  - 24
  - 25
  - 26
  - 27
  - 28
  - 29
  - 30
  - 31
  - 32
  - 33
  - 34
  - 35
  - 36
  - 37
  - 38
  - 39
  - 40
  - 41
  - 42
  - 43
  - 44
  - 45
  - 46
  - 47
  - 48
  - 49
  - 50
  - 51
  - 52
  - 53
  - 54
  - 55
  - 56
  - 57
  - 58
  - 59
  - 60
5. Olsen, M.H., et al., *A call to action and a lifecourse strategy to address the global burden of raised blood pressure on current and future generations: the Lancet Commission on hypertension*. Lancet, 2016. **388**(10060): p. 2665-2712.
6. Addo, J., L. Smeeth, and D.A. Leon, *Hypertension in sub-saharan Africa: a systematic review*. Hypertension, 2007. **50**(6): p. 1012-8.
7. Chow, C.K., et al., *Prevalence, awareness, treatment, and control of hypertension in rural and urban communities in high-, middle-, and low-income countries*. Jama, 2013. **310**(9): p. 959-68.
8. Lamptey, P., et al., *Evaluation of a community-based hypertension improvement program (ComHIP) in Ghana: data from a baseline survey*. BMC Public Health, 2017. **17**(1): p. 368.
9. GSS, *Population by Region, District, Locality of Residence, Age Groups and Sex, 2010*. Accra, Ghana: Ghana Statistical Service. [http://www.statsghana.gov.gh/docfiles/population by region district locality of residence age groups and sex, 2010.pdf](http://www.statsghana.gov.gh/docfiles/population%20by%20region%20district%20locality%20of%20residence%20age%20groups%20and%20sex%202010.pdf). Accessed November 22, 2016 2012.
10. Ogedegbe, G., et al., *Health insurance coverage with or without a nurse-led task shifting strategy for hypertension control: A pragmatic cluster randomized trial in Ghana*. PLoS Med, 2018. **15**(5): p. e1002561.
11. Sobry, A., et al., *Caseload, management and treatment outcomes of patients with hypertension and/or diabetes mellitus in a primary health care programme in an informal setting*. Trop Med Int Health, 2014. **19**(1): p. 47-57.
12. Kuria, N., et al., *Compliance to follow up and adherence to medication in hypertensive patients in an urban informal settlement in Kenya: comparison of three models of care*. Trop Med Int Health, 2018.
13. Werner, M.E., et al., *Results of a hypertension and diabetes treatment program in the slums of Nairobi: a retrospective cohort study*. BMC Health Services Research, 2015. **15**: p. 512.
14. Musicha, C., et al., *Assessing clinical services and retention in care following screening for hypertension and diabetes among Malawian adults: an urban/rural comparison*. J Hypertens, 2016. **34**(11): p. 2172-9.

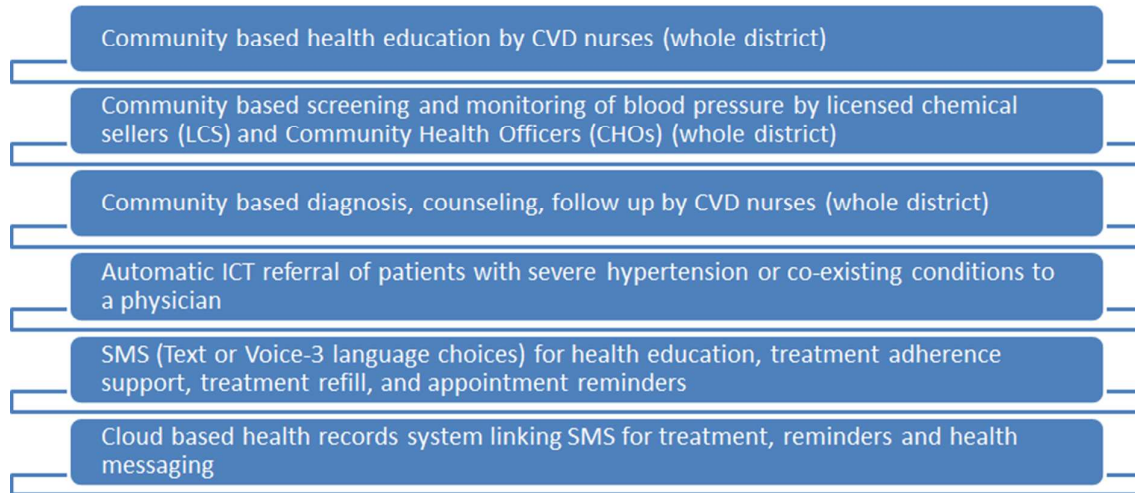

Supplementary figure 1) components of the ComHIP Programme

| Visit Number                     | When?                                                                                                                                                                                                                                                                                        | Activity                                                                                                                                                                                                                                                                                                                                                                                                                                  |
|----------------------------------|----------------------------------------------------------------------------------------------------------------------------------------------------------------------------------------------------------------------------------------------------------------------------------------------|-------------------------------------------------------------------------------------------------------------------------------------------------------------------------------------------------------------------------------------------------------------------------------------------------------------------------------------------------------------------------------------------------------------------------------------------|
| <b>1</b>                         | After patient has been screened and referred by LCS, CHO                                                                                                                                                                                                                                     | CVD Nurse to recheck BP                                                                                                                                                                                                                                                                                                                                                                                                                   |
| <b>2</b>                         | Two weeks after visit 1                                                                                                                                                                                                                                                                      | <ol style="list-style-type: none"> <li>1. CVD Nurse to recheck BP and confirm diagnosis</li> <li>2. Enroll patient, perform risk assessment, perform anthropometric measurements</li> <li>3. Refer to <i>Referral SOP for CVD nurse</i> for all patients that should be referred to Physician.</li> <li>4. Initiate treatment</li> <li>5. Order laboratory investigation as needed</li> <li>6. Perform Hypertension counseling</li> </ol> |
| <b>3</b>                         | 6 weeks after visit 2                                                                                                                                                                                                                                                                        | <ol style="list-style-type: none"> <li>1. Re-check BP</li> <li>2. Assess treatment, perform counseling</li> </ol>                                                                                                                                                                                                                                                                                                                         |
| <b>4</b>                         | 6 weeks after visit 3                                                                                                                                                                                                                                                                        | <ol style="list-style-type: none"> <li>1. Review treatment plan until goal is reached</li> <li>2. Perform anthropometric measurements every 3 months after enrollment</li> </ol>                                                                                                                                                                                                                                                          |
| <b>5 &amp; subsequent visits</b> | <ul style="list-style-type: none"> <li>• Every 3 months for patients with Mild Hypertension (treated by CVD nurse)</li> <li>• Every 2 months for patient with Moderate Hypertension (treated by CVD nurse)</li> <li>• Monthly for Patients with High (treated by Physicians only)</li> </ul> | <ol style="list-style-type: none"> <li>1. Re-check BP, review treatment, assess for risk factors, perform Hypertension counseling</li> <li>2. Conduct follow up assessment every 6 months after enrollment</li> </ol>                                                                                                                                                                                                                     |

Supplementary Figure 2. guidelines for patient visits

| Phase                                       | Activity                                | Community Health Officer | Licensed Chemical Seller | CVD Nurse | Physician |
|---------------------------------------------|-----------------------------------------|--------------------------|--------------------------|-----------|-----------|
| Phase 1: Screening                          | Community BP screening                  | Yes                      | Yes                      | No        | No        |
|                                             | Screening referral                      | Yes                      | Yes                      | No        | No        |
| Phase 2: Diagnostic Evaluation              | Confirmation of BP (HTN) diagnosis      | No                       | No                       | Yes       | Yes       |
|                                             | Staging of degree of HTN                | No                       | No                       | Yes       | Yes       |
|                                             | Assessment of other CVD risk factors    | No                       | No                       | Yes       | Yes       |
|                                             | Assessment of prevailing CVD symptoms   | No                       | No                       | Yes       | Yes       |
|                                             | Overall risk assessment/ Stratification | No                       | No                       | Yes       | Yes       |
|                                             | Assessment of family history of CVD     | No                       | No                       | Yes       | Yes       |
|                                             | Laboratory investigation                | No                       | No                       | Yes       | Yes       |
|                                             | Assessment of target organ complication | No                       | No                       | Yes       | Yes       |
|                                             | Assessment of Lifestyle Issues          | No                       | No                       | Yes       | Yes       |
|                                             | Diagnostic referral                     | No                       | No                       | Yes       | No        |
| Phase 3: Management, Monitoring & Follow Up | Baseline Anthropometry                  | No                       | No                       | Yes       | Yes       |
|                                             | Recommendation for drug treatment       | No                       | No                       | Yes       | Yes       |
|                                             | Medication Dispensing                   | No                       | Yes                      | No        | No        |
|                                             | Recommendation for Non-drug treatment   | Yes                      | Yes                      | Yes       | Yes       |
|                                             | Evaluation of drug side effects         | No                       | Yes                      | Yes       | Yes       |
|                                             | Monitoring of BP response to treatment  | No                       | Yes                      | Yes       | Yes       |
|                                             | Adherence Counselling                   | No                       | Yes                      | Yes       | Yes       |
|                                             | Anthropometric monitoring               | No                       | No                       | Yes       | Yes       |
|                                             | Regular follow up and interaction       | No                       | No                       | Yes       | No        |
| Management referral                         | No                                      | No                       | Yes                      | Yes*      |           |

Supplementary Table 1) Summary of roles of various service delivery personnel

\*In rare instances, certain patients may be referred by the Physician to a hypertension specialist

- I. Diuretic: Bendroflumethiazide. –initial dose, 2.5mg daily. Maximum dose of 5mg daily.
- II. Beta-blocker: Atenolol-initial dose of 50mg daily. Maximum dose of 100mg daily provided the heart rate is greater than 60/min on the lower dose.
- III. Calcium channel blocker: Nifedipine retarde or XL -initial dose 30mg daily. Maximum dose of 60 to 90 mg daily.

Supplementary Table 2) Recommended medications and dosages

STROBE Statement—checklist of items that should be included in reports of observational studies

|                              | Item No. | Recommendation                                                                                                                                                                             | Page No. |
|------------------------------|----------|--------------------------------------------------------------------------------------------------------------------------------------------------------------------------------------------|----------|
| <b>Title and abstract</b>    | 1        | (a) Indicate the study’s design with a commonly used term in the title or the abstract                                                                                                     | 1        |
|                              |          | (b) Provide in the abstract an informative and balanced summary of what was done and what was found                                                                                        | 2        |
| <b>Introduction</b>          |          |                                                                                                                                                                                            |          |
| Background/rationale         | 2        | Explain the scientific background and rationale for the investigation being reported                                                                                                       | 3-4      |
| Objectives                   | 3        | State specific objectives, including any prespecified hypotheses                                                                                                                           | 4        |
| <b>Methods</b>               |          |                                                                                                                                                                                            |          |
| Study design                 | 4        | Present key elements of study design early in the paper                                                                                                                                    | 5        |
| Setting                      | 5        | Describe the setting, locations, and relevant dates, including periods of recruitment, exposure, follow-up, and data collection                                                            | 5        |
| Participants                 | 6        | (a) <i>Cohort study</i> —Give the eligibility criteria, and the sources and methods of selection of participants. Describe methods of follow-up                                            | 5-6      |
|                              |          | <i>Case-control study</i> —Give the eligibility criteria, and the sources and methods of case ascertainment and control selection. Give the rationale for the choice of cases and controls |          |
|                              |          | <i>Cross-sectional study</i> —Give the eligibility criteria, and the sources and methods of selection of participants                                                                      |          |
|                              |          | (b) <i>Cohort study</i> —For matched studies, give matching criteria and number of exposed and unexposed                                                                                   |          |
|                              |          | <i>Case-control study</i> —For matched studies, give matching criteria and the number of controls per case                                                                                 |          |
| Variables                    | 7        | Clearly define all outcomes, exposures, predictors, potential confounders, and effect modifiers. Give diagnostic criteria, if applicable                                                   | 6        |
| Data sources/<br>measurement | 8*       | For each variable of interest, give sources of data and details of methods of assessment (measurement). Describe comparability of assessment methods if there is more than one group       | 6        |
| Bias                         | 9        | Describe any efforts to address potential sources of bias                                                                                                                                  | 6-7      |
| Study size                   | 10       | Explain how the study size was arrived at                                                                                                                                                  | 6-7      |

Continued on next page

|                        |     |                                                                                                                                                                                                                    |       |
|------------------------|-----|--------------------------------------------------------------------------------------------------------------------------------------------------------------------------------------------------------------------|-------|
| Quantitative variables | 11  | Explain how quantitative variables were handled in the analyses. If applicable, describe which groupings were chosen and why                                                                                       | 7     |
| Statistical methods    | 12  | (a) Describe all statistical methods, including those used to control for confounding                                                                                                                              | 7     |
|                        |     | (b) Describe any methods used to examine subgroups and interactions                                                                                                                                                | 7     |
|                        |     | (c) Explain how missing data were addressed                                                                                                                                                                        | 7     |
|                        |     | (d) <i>Cohort study</i> —If applicable, explain how loss to follow-up was addressed                                                                                                                                | 7     |
|                        |     | <i>Case-control study</i> —If applicable, explain how matching of cases and controls was addressed<br><i>Cross-sectional study</i> —If applicable, describe analytical methods taking account of sampling strategy |       |
|                        |     | (e) Describe any sensitivity analyses                                                                                                                                                                              |       |
| <b>Results</b>         |     |                                                                                                                                                                                                                    |       |
| Participants           | 13* | (a) Report numbers of individuals at each stage of study—eg numbers potentially eligible, examined for eligibility, confirmed eligible, included in the study, completing follow-up, and analysed                  | 7-8   |
|                        |     | (b) Give reasons for non-participation at each stage                                                                                                                                                               | 7-8   |
|                        |     | (c) Consider use of a flow diagram                                                                                                                                                                                 |       |
| Descriptive data       | 14* | (a) Give characteristics of study participants (eg demographic, clinical, social) and information on exposures and potential confounders                                                                           | 7-9   |
|                        |     | (b) Indicate number of participants with missing data for each variable of interest                                                                                                                                | 7-9   |
|                        |     | (c) <i>Cohort study</i> —Summarise follow-up time (eg, average and total amount)                                                                                                                                   | 7-9   |
| Outcome data           | 15* | <i>Cohort study</i> —Report numbers of outcome events or summary measures over time                                                                                                                                | 10-13 |
|                        |     | <i>Case-control study</i> —Report numbers in each exposure category, or summary measures of exposure                                                                                                               |       |
|                        |     | <i>Cross-sectional study</i> —Report numbers of outcome events or summary measures                                                                                                                                 |       |
| Main results           | 16  | (a) Give unadjusted estimates and, if applicable, confounder-adjusted estimates and their precision (eg, 95% confidence interval). Make clear which confounders were adjusted for and why they were included       | 8-14  |
|                        |     | (b) Report category boundaries when continuous variables were categorized                                                                                                                                          |       |
|                        |     | (c) If relevant, consider translating estimates of relative risk into absolute risk for a meaningful time period                                                                                                   |       |

Continued on next page



1  
2  
3  
4  
5  
6  
7  
8  
9  
10  
11  
12  
13  
14  
15  
16  
17  
18  
19  
20  
21  
22  
23  
24  
25  
26  
27  
28  
29  
30  
31  
32  
33  
34  
35  
36  
37  
38  
39  
40  
41  
42  
43  
44  
45  
46  
47

|                          |    |                                                                                                                                                                            |       |
|--------------------------|----|----------------------------------------------------------------------------------------------------------------------------------------------------------------------------|-------|
| Other analyses           | 17 | Report other analyses done—eg analyses of subgroups and interactions, and sensitivity analyses                                                                             | 10-14 |
| <b>Discussion</b>        |    |                                                                                                                                                                            |       |
| Key results              | 18 | Summarise key results with reference to study objectives                                                                                                                   | 14    |
| Limitations              | 19 | Discuss limitations of the study, taking into account sources of potential bias or imprecision. Discuss both direction and magnitude of any potential bias                 | 15    |
| Interpretation           | 20 | Give a cautious overall interpretation of results considering objectives, limitations, multiplicity of analyses, results from similar studies, and other relevant evidence | 16    |
| Generalisability         | 21 | Discuss the generalisability (external validity) of the study results                                                                                                      | 15    |
| <b>Other information</b> |    |                                                                                                                                                                            |       |
| Funding                  | 22 | Give the source of funding and the role of the funders for the present study and, if applicable, for the original study on which the present article is based              | 17    |

\*Give information separately for cases and controls in case-control studies and, if applicable, for exposed and unexposed groups in cohort and cross-sectional studies.

**Note:** An Explanation and Elaboration article discusses each checklist item and gives methodological background and published examples of transparent reporting. The STROBE checklist is best used in conjunction with this article (freely available on the Web sites of PLoS Medicine at <http://www.plosmedicine.org/>, Annals of Internal Medicine at <http://www.annals.org/>, and Epidemiology at <http://www.epidem.com/>). Information on the STROBE Initiative is available at [www.strobe-statement.org](http://www.strobe-statement.org).

# BMJ Open

## Results from an innovative model of hypertension care: The ComHIP Cohort study

|                                 |                                                                                                                                                                                                                                                                                                                                                                                                                                                                                                                                                                                                                                                                                                                                                                                |
|---------------------------------|--------------------------------------------------------------------------------------------------------------------------------------------------------------------------------------------------------------------------------------------------------------------------------------------------------------------------------------------------------------------------------------------------------------------------------------------------------------------------------------------------------------------------------------------------------------------------------------------------------------------------------------------------------------------------------------------------------------------------------------------------------------------------------|
| Journal:                        | <i>BMJ Open</i>                                                                                                                                                                                                                                                                                                                                                                                                                                                                                                                                                                                                                                                                                                                                                                |
| Manuscript ID                   | bmjopen-2018-026799.R1                                                                                                                                                                                                                                                                                                                                                                                                                                                                                                                                                                                                                                                                                                                                                         |
| Article Type:                   | Research                                                                                                                                                                                                                                                                                                                                                                                                                                                                                                                                                                                                                                                                                                                                                                       |
| Date Submitted by the Author:   | 03-Jan-2019                                                                                                                                                                                                                                                                                                                                                                                                                                                                                                                                                                                                                                                                                                                                                                    |
| Complete List of Authors:       | Adler, Alma; London School of Hygiene & Tropical Medicine, Department of Non-communicable Disease Epidemiology; Harvard Medical School<br>Laar, Amos; School of Public Health, University of Ghana, Department of Population, Family & Reproductive Health<br>Prieto-Merino, David; London School of Hygiene and Tropical Medicine, Department of Non-communicable Disease Epidemiology<br>Der, Reina; Family Health International<br>Mangortey, Debbie ; Family Health International<br>Dirks, Rebecca; Family Health International<br>Lamptey, Peter; London School of Hygiene & Tropical Medicine, Department of Non-communicable Disease Epidemiology<br>Perel, Pablo; London School of Hygiene and Tropical Medicine, Department of Non-Communicable Disease Epidemiology |
| <b>Primary Subject Heading</b>: | Global health                                                                                                                                                                                                                                                                                                                                                                                                                                                                                                                                                                                                                                                                                                                                                                  |
| Secondary Subject Heading:      | Epidemiology, Public health                                                                                                                                                                                                                                                                                                                                                                                                                                                                                                                                                                                                                                                                                                                                                    |
| Keywords:                       | Hypertension < CARDIOLOGY, cohort, EPIDEMIOLOGY                                                                                                                                                                                                                                                                                                                                                                                                                                                                                                                                                                                                                                                                                                                                |
|                                 |                                                                                                                                                                                                                                                                                                                                                                                                                                                                                                                                                                                                                                                                                                                                                                                |

SCHOLARONE™  
Manuscripts

## Results from an innovative model of hypertension care: The ComHIP Cohort study

Alma J Adler<sup>1,2\*</sup>, Amos K Laar<sup>3\*</sup>, David Prieto-Merino<sup>1</sup>, Reina M. M. Der<sup>4</sup>, Debbie Mangortey<sup>4</sup>,  
Rebecca Dirks<sup>5</sup>, Peter Lamptey<sup>1</sup>, Pablo Perel<sup>1</sup>

\*Co-first authors

### Correspondence:

**Dr. Alma J Adler**

[alma.adler@lshtm.ac.uk](mailto:alma.adler@lshtm.ac.uk)

<sup>1</sup>Department of Non-communicable Disease Epidemiology. London School of Hygiene & Tropical Medicine. Keppel St, London. WC1E 7HT

<sup>2</sup>Department of Global Health and Social Medicine, Harvard Medical School. Boston, MA, United States

<sup>3</sup>Department of Population, Family, & Reproductive Health, School of Public Health, University of Ghana, LG 13, Legon, Accra, Ghana.

<sup>4</sup>Family Health International 360, Accra, Ghana

<sup>5</sup>Family Health International 360, Washington DC, United States.

Alma J Adler [alma.adler@lshtm.ac.uk](mailto:alma.adler@lshtm.ac.uk)

Amos K Laar [alaar@ug.edu.gh](mailto:alaar@ug.edu.gh)

David Prieto -Merino [david.prieto@lshtm.ac.uk](mailto:david.prieto@lshtm.ac.uk)

Reina M. M. Der [RDer@fhi360.org](mailto:RDer@fhi360.org)

Debbie Mangortey [DMangortey@fhi360.org](mailto:DMangortey@fhi360.org)

Rebecca Dirks [rdirks@fhi360.org](mailto:rdirks@fhi360.org)

Peter Lamptey [plamptey@fhi360.org](mailto:plamptey@fhi360.org)

Pablo Perel [pablo.perel@lshtm.ac.uk](mailto:pablo.perel@lshtm.ac.uk)

**Word count: 4435**

**Abstract:**

**Objectives:** to evaluate the effectiveness of the Community-Based Hypertension Improvement Project (ComHIP) in increasing hypertension control.

**Setting:** Lower Manya Krobo, Eastern Region, Ghana.

**Participants:** All adult hypertensive community members, except pregnant women, were eligible for inclusion in the study. We enrolled 1339 participants, 69% of which were female. 552 had a six-month visit, and 338 had a 12-month visit.

**Interventions:** We report on a package of interventions where community based CVD nurses were trained by Family Health International (FHI360). CVD nurses confirmed diagnoses of known hypertensives and newly screened individuals. Participants were treated according to clinical guidelines established through the project's Technical Steering Committee. Patients received three types of reminder and adherence messages. We used CommCare, a cloud based system, as a case management and referral tool.

**Primary outcome:** Hypertension control defined as blood pressure under 140/90 mm Hg. Secondary outcomes: Changes in blood pressure and knowledge of risk factors for hypertension.

**Results:** After one year of intervention 72% (95% CI 67%, 77%) of participants had their hypertension under control. Systolic BP was reduced by -12.2 mmHg (95%CI 14.4, -10.1) and diastolic BP by -7.5 mmHg (95%CI 9.9, 6.1). Due to low retention, we were unable to look at knowledge of risk factors. Factors associated with remaining in the programme for 12-months included education, older age, hypertension under control at enrollment, and enrollment date. The majority of patients who remained in the programme were on treatment, with two-thirds taking at least two medications.

**Conclusions:** Patients retained in ComHIP had increased BP control. However, high loss to follow-up limits potential public health impact of these types of programmes. To minimize impact of externalities, programmes should include standard procedures and back-up systems to maximize the possibility that patients stay in the programme.

Keywords:

Hypertension, Ghana, Community based cohort study.

**STRENGTHS AND LIMITATIONS OF THIS STUDY**

- ComHIP is a large cohort study testing a community based model of hypertension care
- Trained community based cardiovascular nurses conducted screening, diagnosis and management of hypertension patients
- Patients were sent three types of SMS, daily reminders to take their medications, appointment reminders, and weekly health education messages
- Protocol stated that blood pressure would be checked with a minimum of three serial readings at regular intervals, but at a minimum of 6-monthly intervals
- a limitation of the study was that it did not include a control group

## INTRODUCTION:

Globally, raised systolic blood pressure (SBP) is one of the greatest risk factors for disability (GBD, 2017). Hypertension is generally considered to be the level of raised blood pressure (BP) where medications show a reduction in clinical events in randomized trials. This is generally accepted as  $\geq 140$  SBP mmHg or  $\geq 90$  diastolic mmHg (DBP)[1].

Evidence shows that lowering hypertensive individual's blood pressure with anti-hypertensive drugs reduces the risk of further cardiovascular events; with a reduction in stroke by an estimated 35–40% and a myocardial infarction and heart failure reduced by 20–25% reduction [2-4]. Whilst average age-standardised BP is decreasing in most high-income countries, it is increasing in most low and middle income countries (LMICs) [5] with 32% to 50% of adults estimated to be hypertensive in sub-Saharan Africa [6].

The Prospective Urban Rural Epidemiology (PURE) study showed that despite high levels of hypertension worldwide, only 34% of Africans are aware of their hypertension status, only 31.3% receive any treatment and only 6.5% have their blood pressure under control .[7] Our recent study of hypertension prevalence in the Lower Manya Krobo, Ghana, showed that only 2.1% of hypertensives had their blood pressure under control [8].

Because of the great burden of hypertension in Sub-Saharan Africa and the poor rate of hypertension control, innovative methods for hypertension management are needed. Launched in 2015, the Community-Based Hypertension Improvement Project (ComHIP) introduced an innovative model for hypertension control at the community level. ComHIP is a public-private partnership between the Ghana Health Service, FHI 360 and the Novartis Foundation.

The aim of ComHIP is to improve hypertension management and control in the Lower Manya Krobo district in the Eastern Region of Ghana. The programme includes a package of interventions composed of six components (Supplementary Figure 1), aimed at increasing access to hypertension services at the community level. Screening in the community is provided by Cardiovascular Disease (CVD) nurses and Community Health Officers (CHOs), as well as through local private sector drug shops called licensed chemical sellers (LCS). Ongoing hypertension management is provided by CVD nurses or, for those with co-morbidities or severe conditions, at district hospitals. Patients are encouraged to routinely monitor their blood pressure by having their BP measured at a LCS. The various service providers are linked through a cloud-based system which revolve around bringing hypertension care into the community. Physicians, Community based CVD nurses, CHOs, and LCS staff were trained by FHI 360 to provide specific services.

For instance, CVD nurses conduct hypertension screening, and confirmation of hypertension diagnosis, staging of degree of hypertension, assessment of other CVD risk factors, counselling, monitoring and follow up and trained LCS conduct community BP screening and awareness raising. Further information is found in the supplementary material.

The ComHIP Programme is being independently evaluated by the University of Ghana School of Public Health and the London School of Hygiene & Tropical Medicine with a mixed method approach through a series of quantitative and qualitative studies. These studies include repeat cross-sectional surveys within the intervention and comparison districts to track overall awareness and prevalence of hypertension; a cohort of hypertensive persons included in ComHIP to assess hypertension control; a cost-effectiveness evaluation; a study to assess the level of patient-centeredness within the

1  
2  
3 programme; and a qualitative assessment of ComHIP stakeholders. In this paper we report the results  
4 of the cohort study.  
5  
6  
7

## 8 **Objectives**

9  
10 The objective of this study was to evaluate the effectiveness of ComHIP for controlling hypertension  
11 in hypertensive patients enrolled into the ComHIP programme.  
12  
13

## 14 **METHODS:**

### 15 **Study design**

16  
17 The study was a prospective cohort study which included all patients recruited into the ComHIP  
18 Programme.  
19  
20

### 21 **Setting**

22  
23 The study was conducted in Lower Manya Krobo, a municipality in the Eastern region of Ghana. This  
24 is a peri-urban setting approximately two hours from the national capital, Accra with a population of  
25 approximately 89,246, of whom 84% live in urban areas.[9] Recruitment began October 2015 and  
26 ended in December 2016.  
27  
28  
29

### 30 **Training**

31  
32 FHI360 and the MoH conducted training. Training duration ranged from three days for LCS, and  
33 physicians to 6 days for CVD nurses. Aside from the general training package (BP screening including  
34 the recommended standard operating procedures for BP checking, Lifestyle modification counselling,  
35 interviewing/counselling techniques, treatment adherence counselling) offered to all personnel, CVD  
36 nurses and physicians received additional training on hypertension diagnosis, assessing the risk of  
37 patients. Assessing for TODs, drugs for the management of hypertension and their side effects and  
38 contraindications.  
39  
40

41  
42 Participants were issued certificate of participation signed by the cardiologist specialist who  
43 conducted the training and the director general of the GHS. Also, as is done by the GHS the continuous  
44 learning log books of the GHS personnel were endorsed by the project to document the training  
45 received.  
46  
47  
48

### 49 **Participants**

50  
51 Patients were enrolled into the programme if 1) they were known hypertensives or 2) had an elevated  
52 blood pressure reading at any ComHIP screening. Any individual living in Lower Manya Krobo 18 years  
53 or older was eligible, except pregnant women. Patients had to have access to a mobile phone to be  
54 enrolled in the programme. However, in order to negate loss of patients, patients without phones  
55 were not necessarily excluded based on this, rather, they were encouraged to provide phone numbers  
56 of a willing third party who lived nearby.  
57  
58  
59  
60

## Intervention

Community members were screened by CHOs, LCS, or CVD nurses, using Omron M6 BP monitors that came with a cuff size of 42 cm which is about the 2nd largest cuff size in the market for those machines. Though the project requested for nurses to report cases of patient with bigger upper arms that required bigger cuff sizes, throughout the implementation, no such reports was received. The average of three serial readings was used to confirm hypertension diagnosis. Patients who were at risk of hypertension (SBP  $\geq 120$ , but  $< 140$ ) were given health education. All patients with SBP  $\geq 140$  or DBP  $\geq 90$  were referred to a CVD nurse for diagnosis. Patients with SBP  $\geq 180$  or DBP  $\geq 110$  were enrolled and referred to the physician for urgent care. Patients that were considered to have severe hypertension, (SBP  $\geq 180$  or DBP  $\geq 110$  or SBP between 160 – 179 or DBP 100 – 109 with one or more risk factors, or any evidence of organ damage see Appendix A) were referred for management by a physician at one of the district hospitals, until their blood pressure was stable, and then they were returned to CVD nurses for care. All other patients were managed by CVD nurses.

Hypertensive individuals were enrolled and followed for at least one year. All patient interactions (with LCS, CHOs, CVD nurses, community and hospital pharmacist and doctors) were recorded and uploaded through the CommCare platform. Patients were requested to present for appointments at the following intervals; monthly BP monitoring appointments, monthly, bi-monthly or quarterly review visits (depending on risk factors and personal factors); and six-monthly follow up assessments. Participants were recruited from October 2015 until December 2016, and followed through December 2017. Guidelines for patient visits can be found in the supplementary materials (Supplementary Table 1 and Supplementary Figure 2, Appendix A).

All enrolled participants were treated based on the same clinical guidelines established through the project's Technical Steering Committee, which included senior members of the GHS. The treatment goal was to improve blood pressure of all patients to below 140/90 mmHg. Participants were initiated onto drug therapy and supplemented with non-drug therapy (lifestyle modification including low salt diets, increased fruit and vegetable diet, reduction in alcohol consumption, smoking cessation and regular aerobic exercise) irrespective of their risk level. The decision to initiate a monotherapy or multiple drug therapy depended largely on the level at which the participants BP was above goal and the overall risk level of patients. Recommended drugs and dosages are found in supplementary Table 2. Patient's response to antihypertensive were reviewed every three months if possible and modified based on recommended guidelines if required. In Ghana, there is a system of National Health Insurance, and every Ghanaian is required to enrol in. The Scheme provides select medications at no cost for anyone who has a valid National Health Insurance card. Although the NHIS does not attempt to treat all diseases suffered by insured members, over 95% of disease conditions that afflict us are covered by the NHIS. Services can be accessed at accredited health facilities.

CommCare is a vital component of ComHIP. It serves as a case management system, referral tool, and job aid for providers. The CommCare database is linked with a SMS platform to automatically send daily adherence reminders, weekly healthy living tips, and consultation and prescription refill reminders to enrolled patients. These messages are sent via text or voice SMS with four language choices. The programme is described in more detail elsewhere [8]. Briefly, through CommCare patients diagnosed with severe hypertension or co-existing conditions are automatically referred to a physician. All patients enrolled in ComHIP receive SMS daily for medication reminders, weekly for health education, and upon need for appointment and screening reminders. CommCare also provides a cloud based health records system that links patients' records with the SMS system. The SMS

1  
2  
3 component of the project was implemented by a third party Viamo, to facilitate the link between the  
4 two systems a bridge was built to automatically relay relevant information from the projects cloud-  
5 based health records to the Viamo messaging platform. To ensure confidentiality, only information  
6 relevant to schedule appoints is relayed to the Viamo platform (i.e. patient code, date of visit, type of  
7 visit, next review or refill appoint, patient's phone number, preferred, language, time of receipt of  
8 message and format of message, referral details and BP). When a visit is missed, the system,  
9 automatically relays back to the CVD nurse who enrolled the Patient or is managing the Patient via  
10 text message for the nurse to trace the patient. Due to operational problems, there was a break in  
11 service in CommCare that began on 12 May 2016 for a period of at least three months.  
12  
13

## 14 15 **Variables**

16  
17 Main outcomes:

18  
19 The main outcomes of interest were hypertension control (<140/90 mmHg), and changes in systolic  
20 and diastolic blood pressure. Because of the low follow up rate, we also used appointment around six  
21 months, and appointment around 12 months as outcomes of interest.  
22

23  
24 Other variables:

25  
26 Other variables included knowledge of risk factors for hypertension, demographic factors including  
27 age, gender and marital status; risk factors such as body-mass index (BMI), awareness of hypertension  
28 (defined as having knowledge of a previous diagnosis of hypertension), having hypertension under  
29 control prior to enrolment, and having previous diagnoses of other heart diseases, and socioeconomic  
30 factors. A full list of variables is found in Table 1.  
31

## 32 33 **Data collection**

34  
35 Data were collected on blood pressure using standardised protocols. At six and 12 months forms were  
36 administered by health care providers to collect information on patient knowledge of risk factors for  
37 hypertension and health behaviours.

38  
39 All data were collected and downloaded from the CommCare platform. Initially data was intended to  
40 be analysed from the patient knowledge/behaviour forms used at six-month and 12-month follow up  
41 appointments. Due to poor levels of follow up, any appointment between five and seven months after  
42 enrolment was used for the six-month appointment analysis, and any appointment between 11 and  
43 13 months after enrolment was used for the 12-month appointment analysis.  
44

## 45 46 **Sample size**

47  
48 This cohort study included all the patients recruited in the ComHIP programme and a specific sample  
49 size was not calculated. However, in the protocol we assumed that the total district population is  
50 about 90,000; about 30,000, of whom are adults, and about 36% [12000] are estimated to be  
51 hypertensive. Assuming that about 10% of the adults with hypertension in the district will be included  
52 in the ComHIP Programme we would have a cohort of 1,200 hypertensive patients.  
53

54  
55 We estimated that a cohort study of 1200 hypertensive patients would provide a power greater than  
56 90% (with an alpha error of 0.05) to detect a two-fold increase of control of hypertension (from 4% to  
57 8%).  
58

## 59 60 **Patient and Public Involvement**



1  
2  
3 Community members, including community leaders, were first involved through a stakeholder  
4 workshop. In this workshop, community members shared their thoughts, knowledge, and concerns  
5 about health in general, NCD-related conditions, and access to healthcare. Furthermore, community  
6 members were made aware of the hypertension project planned to be initiated in their community.  
7 This information was considered in finalizing the design of the service delivery model and the  
8 development of prevention, education, and behaviour change messages.  
9  
10

11 Patients were recruited into the project through free screening offered at 1) local drug shops, names  
12 Licensed Chemical Sellers; 2) Community Health Planning Service (CHPS) sites; or 3) Community  
13 pharmacies. There were community screening activities and radio programs through which  
14 community members were educated on the project and hypertension in general. In addition,  
15 ComHIP staff conducted annual stakeholder meetings to provide updates to community members  
16 on the project progress.  
17  
18  
19  
20

### 21 **Statistical methods**

22  
23 We recoded exposures to reduce the number of levels and of missing values: For all the previous  
24 diagnosis / awareness: We have coded "missing" or "not known" or "no answer" as 0, so that value 1  
25 always means "Patient knows of a previous diagnosis" while value 0 means anything else (patient does  
26 not know or answer is missing). Because there were few previous diagnoses of each specific event  
27 (MI, stroke, diabetes...) we created a variable with value 1 if any diagnosis was present and 0 if none  
28 was present.  
29

30 For education, we assumed that those that did not know (48) or did not respond (26) did not have  
31 previous formal education (the largest group). We then grouped education in 4 levels: 1) no formal  
32 education, 2) primary (completed or not) 3) secondary (completed or not) and 4) higher (university)  
33  
34

35 For marital status, we made 4 categories: 1) Never married 2) married or cohabiting 3) separated or  
36 divorced 4) widowed.  
37

38 We described the distribution of each variable at baseline, six-months and 12-months follow up,  
39 although comparisons cannot be done directly due to the large number of individuals that did not  
40 have follow up. To study what variables might affect the patient staying for 12-months in the  
41 programme we ran a logistics regression for the binary outcome variable: "patient had 12-month visit  
42 (Y/N)". To consider the loss to follow up (patterns of visits), we separated the individuals into four  
43 different groups: (A) those individuals that did not come to any follow up visit, (B) those that came  
44 only to the 6-month visit, (C) those that came only to the 12-month visit, and (D) those that came to  
45 both follow up visits.  
46  
47

48 We described the absolute values of blood pressure (SBP and DBP), the proportion of patients with  
49 blood pressure under control and the distribution of hypertension stages for each of these groups in  
50 each of the visits. We estimated the average changes of blood pressure for each group at each follow  
51 up visit and we compared the changes between groups with Student's t-tests. We compared the mean  
52 of SBP and DBP between the groups with ANOVA models. To compare the proportion of patients with  
53 HT control or the distribution of hypertension stages between groups we used chi-square tests. To  
54 test the changes of variables within groups we used paired t-tests for continuous variables and  
55 marginal homogeneity tests for categorical variables.  
56  
57  
58  
59  
60

## Ethical Approval

Ethical approval was granted by the Institutional Review Boards (IRBs) of LSHTM (LSHTM Ethics Ref: 10,152), the Ghana Health Service (ID NO. GHS-ERC 04/01/15), and the University of Ghana at Noguchi Memorial Institute for Medical Research (Ethics clearance # IRB00001276). Written informed consent was obtained from all participants.

## RESULTS:

### Participants:

A total of 18,339 individuals 18 years and over were screened, 4118 referred to CVD nurses to confirm diagnosis, and of those 1339 were enrolled (76 (5.7%) low risk Grade 1 BP which is SBP 140 – 159 or DBP 90 – 99 without any target organ damages (TODs), co-morbidities or  $\geq 2$  risk factors), 559 (41.7%) (Moderate risk (SBP 160-179 or DBP 100 – 109 without any TODs, co-morbidities or  $\geq 2$  risk factors or Grade 1 BP with TODs, co-morbidities or  $\geq 2$  risk factors), and 704 (52.6%) High risk (Grade 3 which is SBP  $\geq 180$  or DBP  $\geq 101$  without any TODs, co-morbidities or  $\geq 2$  risk factors or Grade 2 BP with TODs, co-morbidities or  $\geq 2$  risk factors).

### General characteristics of the cohort

The average age of the cohort was 58 years. Everyone was enrolled into the cohort by CVD nurses. Of the 1,339 people enrolled in the cohort, 24% were referred to ComHIP by LCS, 45% were referred by CHO, 23% were referred by CVD nurses, 3% were through physicians, and 5% were referred through other channels. 69% of the cohort was female, 31% male. Other characteristics of people enrolled in the cohort are found in Table 1.

Table 1. Characteristics of participants in the study at baseline.

| Characteristic            | % all | % 6 months | %12 months |
|---------------------------|-------|------------|------------|
| <b>Number</b>             | 1339  | 552        | 338        |
| <b>Referred by</b>        |       |            |            |
| LCS                       | 23.9  | 23.4       | 24.3       |
| CHO                       | 45.0  | 40.8       | 38.5       |
| CVD Nurse                 | 23.3  | 25.4       | 26.9       |
| Other                     | 7.8   | 10.5       | 10.4       |
| <b>Sex</b>                |       |            |            |
| Male                      | 30.8  | 32.3       | 30.7       |
| Female                    | 69.2  | 67.8       | 69.3       |
| <b>Age class</b>          |       |            |            |
| 30-44                     | 17.9  | 14.7       | 13.6       |
| 45-54                     | 23.5  | 21.7       | 24.3       |
| 55-64                     | 27.3  | 31.9       | 32.0       |
| 65+                       | 31.4  | 31.7       | 30.2       |
| <b>Hypertension stage</b> |       |            |            |
| Normal                    | 26.4  | 38.6       | 41.7       |
| Stage I                   | 39    | 39.9       | 39.4       |
| Stage II                  | 19.6  | 14.5       | 13.0       |

|                                     |       |       |       |
|-------------------------------------|-------|-------|-------|
| Stage III                           | 14.9  | 7.1   | 5.9   |
| <b>Mean BP</b>                      |       |       |       |
| DBP                                 | 90.8  | 87.6  | 86.9  |
| SBP                                 | 149.0 | 143.3 | 141.2 |
| <b>Education</b>                    |       |       |       |
| No formal education                 | 37.0  | 32.3  | 31.4  |
| Primary                             | 41.7  | 43.1  | 45.6  |
| Secondary                           | 16.1  | 18.5  | 14.8  |
| Higher                              | 5.2   | 6.2   | 8.3   |
| <b>Ethnicity</b>                    |       |       |       |
| Akan                                | 4.2   | 28.6  | 21.4  |
| Dangme                              | 69.5  | 42.2  | 26    |
| Ewe                                 | 22    | 39.3  | 22.4  |
| Other or don't know                 | 4.3   |       |       |
| <b>Religion</b>                     |       |       |       |
| Christian                           | 96    | 97.6  | 97.9  |
| Muslim                              | 3.2   | 1.5   | 1.2   |
| Traditional                         | 0.5   | 0.4   | 0.3   |
| None                                | 0.3   | 0.5   | 0.6   |
| <b>Marital status</b>               |       |       |       |
| Never married                       | 5.7   | 5.1   | 3.6   |
| Married/Cohabiting                  | 54.4  | 54.7  | 57.7  |
| Separated/Divorced                  | 5.5   | 14.1  | 15.4  |
| Widowed                             | 26.1  | 25.9  | 23.1  |
| No response                         | 0.2   | 0.2   | 0.3   |
| <b>Household income</b>             |       |       |       |
| Less than 728 GHC                   | 18.7  | 17.0  | 17.2  |
| 728-1020 GHC                        | 17.4  | 20.8  | 19.8  |
| 1021-1098                           | 6.4   | 5.3   | 6.5   |
| 1099-1263                           | 5.0   | 4.9   | 4.7   |
| More than 1263 GHC                  | 12.3  | 11.1  | 11.8  |
| Don't know/no response              | 40.2  | 40.9  | 39.9  |
| <b>Aware of hypertension status</b> |       |       |       |
| Never had BP measured               | 18.7  | 17.6  | 16.3  |
| Was not aware                       | 12.9  | 11.4  | 10.7  |
| Aware                               | 68.5  | 70.8  | 73.1  |
| <b>Taking treatment</b>             |       |       |       |
| Never diagnosed                     | 31.5  | 29.2  | 26.9  |
| Diagnosed and no treatment          | 18    | 15.0  | 16.0  |
| Treatment                           | 50.3  | 55.6  | 56.8  |
| Don't know                          | 0.2   | 0.2   | 0.3   |
| <b>BMI</b>                          |       |       |       |
| Underweight (BMI <18.5)             | 5.4   | 4.9   | 5.0   |
| Normal weight (BMI 18.5-24.9)       | 43.7  | 44.8  | 43.2  |
| Overweight (BMI 25-29.9)            | 29.2  | 30.1  | 32.5  |
| Obese (BMI 30+)                     | 21.7  | 20.3  | 19.2  |

1  
2  
3 \*All hypertensive patients enrolled in cohort

4  
5 \*\*Hypertensive patients with six-month appointment/follow up

6  
7 \*\*Hypertensive patients with a twelve-month appointment/follow up

8  
9  
10  
11  
12 Other risk factors:

13  
14 5.4% of the sample was underweight, 43.7% was normal, 29.2% was overweight and 21.7% was obese.  
15 The mean BMI at enrolment in the cohort was 26.1 (95% CI 25.82, 26.4).

16  
17 We did not analyse smoking, cholesterol or diabetes as only 1% of the sample were smokers, 3.5%  
18 reported having had a previous cholesterol test, and only 28% had a previous diabetes test.

19  
20  
21  
22 Blood Pressure at enrolment

23  
24 The average SBP was 147.2 (SD 22.1) mmHg, and average DBP was 89.9 (SD 13.3) mmHg. At enrolment  
25 917 (68.5%) had a previous diagnosis of hypertension, of which 654 (71.3%) were already taking some  
26 anti-hypertensives, and 297 (32.4%) had their blood pressure under control.

27  
28  
29  
30 Blood pressure management

31  
32 Of the 1339 enrolled in the study, 712 (53.2%) did not come for a follow up (group A), 289 (21.6%) had  
33 only a six-month visit (group B), 75 (5.6%) had only the 12-month visit (group C) and 263 (19.6%) had  
34 both visits (group D). In total only 552 (41%) had a six month follow up appointment, and only 338  
35 (25%) had a 12 month follow up appointment.

36  
37  
38  
39 Loss to follow up and Characteristics of those who stayed in the study

40  
41 Patients with their hypertension already under control were more likely to present for care. The  
42 variable that showed the greatest association with likelihood of having a six or twelve-month  
43 appointment was enrolment month. Participants who enrolled earlier were much more likely to stay  
44 in the programme than those who enrolled later (Table 1)

45  
46  
47 Multivariate analysis suggested that recruitment before 12 May 2016 (one year before the break in  
48 service), age, education and hypertension under control in the first visit showed significant  
49 associations with having a twelve-month appointment. Recruitment after 12 May 2016 reduced the  
50 chances of coming to further visits, the older the patient and the higher the education level, the higher  
51 the chances that the patient would come to the follow up visits. Patients with controlled HT at  
52 enrolment were nearly twice as likely to come to follow up visits. None of the other variables showed  
53 significant associations (Table 2).

Table 2) multivariate analysis of baseline characteristics associated with staying in the programme 12 months

|                                              | OR   | 95% CI       | P value          |
|----------------------------------------------|------|--------------|------------------|
| Enrolled year prior to break                 | 0.46 | (0.35, 0.60) | <b>0.00</b>      |
| Sex                                          | 0.88 | (0.63, 1.24) | 0.48             |
| Age (one year increments)                    | 1.01 | (1.00, 1.02) | <b>0.03</b>      |
| BMI                                          | 1.00 | (0.97, 1.02) | 0.90             |
| Edu. reference category: no formal education |      |              |                  |
| Primary education                            | 1.41 | (1.03, 1.93) | <b>0.03</b>      |
| Secondary Education                          | 1.13 | (0.73, 1.73) | 0.59             |
| Higher education                             | 2.42 | (1.33, 4.43) | <b>0.004</b>     |
| Reference cat: Never married                 |      |              |                  |
| Married/cohabitating                         | 1.77 | (0.90, 3.48) | 0.10             |
| Separated/Divorced                           | 1.86 | (0.90, 3.87) | 0.10             |
| Widowed                                      | 1.27 | (0.61, 2.64) | 0.52             |
| Household size                               | 1.01 | (0.95, 1.07) | 0.69             |
| Hypertension control                         | 1.93 | (1.47, 2.54) | <b>&lt;0.001</b> |
| Awareness of hypertension                    | 1.00 | (1.00, 1.00) | 0.97             |
| Hypertension treatment                       | 1.00 | (0.99, 1.00) | 0.33             |
| Any other previous diagnosis                 | 0.86 | (0.69, 1.07) | 0.18             |
| Confidence in management of hypertension     | 1.00 | (1.00, 1.01) | 0.63             |

### Changes in Blood Pressure

Because 12 month follow up was below 30%, we did not look at overall changes in blood pressure, but we did look at overall changes in blood pressure in those that remained in the study at six and twelve months.

On average, patients who enrolled and presented for a follow-up appointment at around six months had a 10.3 mmHg reduction in SBP (95% CI -12.0,-8.6) and a 6.3mmHg reduction in DBP (95% CI -7.2, -5.2) (Table 3). There was a greater reduction in those patients who had a follow up appointment at one year, when there was a 12.2 mmHg reduction (95% CI -14.4, -10.1) in SBP and a 7.5 mmHg (95% CI 9.9, 6.1) reduction in DBP after one year in the programme. Not all patients who had a 12 month appointment also had a six month appointment, 263 had both, and they had an 11.9 mmHg reduction (95% CI -14.3, -9.5) in SBP and 7.1 reduction (95% CI -8.6, -5.5) in DBP (Table 3).

### Knowledge of risk factors

Because of the poor retention, we were unable to comment on knowledge or risk factors.

Table-3) Changes in BP means and hypertension control by patterns of visits.

| Groups        | N    | Vis. | SBP          |                       | DBP         |                     | HT Control       |
|---------------|------|------|--------------|-----------------------|-------------|---------------------|------------------|
|               |      |      | Mean (SE)    | Mean dif. (95%CI)     | Mean (SE)   | Mean dif. (95%CI)   | % (95% CI)       |
| All patients  | 1339 | E    | 147.2 (0.60) |                       | 89.9 (0.36) |                     | 31% [29% , 34%]  |
|               | 552  | 6m   | 132.9 (0.80) | -10.3 [-12.0 , -8.6]  | 81.3 (0.47) | -6.3 [-7.3 , -5.2]  | 69% [65% , 73%]  |
|               | 338  | 12m  | 128.9 (1.05) | -12.2 [-14.4 , -10.1] | 79.4 (0.61) | -7.5 [-8.9 , -6.1]  | 72% [67% , 77%]  |
| (A) No visits | 712  | E    | 150.4 (0.85) |                       | 91.7 (0.49) |                     | 25% [21% , 28%]  |
| (B) Only 6m   | 289  | E    | 146.4 (1.28) |                       | 89.0 (0.77) |                     | 34% [29% , 40%]  |
|               |      | 6m   | 135.7 (1.15) | -10.1 [-13.2 , -8.1]  | 82.7 (0.68) | -6.3 [-7.8 , -4.8]  | 61% [55% , 67%]* |
| (C) Only 12m  | 75   | E    | 145.9 (2.62) |                       | 90.2 (1.63) |                     | 36% [25% , 48%]  |
|               |      | 12m  | 132.5 (2.56) | -13.5 [-18.5 , -8.6]  | 81.0 (1.38) | -9.2 [-12.4 , -6.0] | 71% [59% , 81%]* |
| (D) 6 & 12m   | 263  | E    | 139.8 (1.18) |                       | 86.1 (0.80) |                     | 43% [37% , 50%]  |
|               |      | 6m   | 129.8 (1.08) | -10.0 [-12.2 , -7.7]  | 79.8 (0.63) | -6.3 [-7.8 , -4.8]  | 77% [72% , 82%]* |
|               |      | 12m  | 127.9 (1.13) | -11.9 [-14.3 , -9.5]  | 79.0 (0.67) | -7.1 [-8.6 , -5.5]  | 72% [66% , 78%]* |

\* The comparison of these intervals with enrolment visit of the same group produce all p-values <0.0001

E= enrolment

There was also a significant reduction in hypertension stage, with a lower percentage of hypertensive individuals having stage III hypertension over time (Table 4).

Table 4) Distribution of Hypertension Stage in each group in each visit.

The P-values are extracted from: (1) Chi-square tests to compare that row with group A of no follow-up. (2) from marginal homogeneity tests comparing the distribution of the same group in enrolment visit.

| Groups by patterns of visits | N     | Visit | No HT | Stage I | Stage II | Stage III | P-value     |
|------------------------------|-------|-------|-------|---------|----------|-----------|-------------|
| All patients                 | 1,339 | 1m    | 31.0% | 39.0%   | 18.4%    | 11.6%     |             |
|                              | 552   | 6m    | 68.7% | 19.7%   | 9.4%     | 2.2%      | < 0.001 (2) |
|                              | 338   | 12m   | 71.9% | 19.5%   | 6.5%     | 2.1%      | < 0.001 (2) |
| (A) No follow-up             | 712   | 1m    | 24.6% | 38.7%   | 21.5%    | 15.2%     |             |
| (B) Only 6m visit            | 289   | 1m    | 34.3% | 39.4%   | 17.0%    | 9.3%      | 0.002 (1)   |
|                              | 289   | 6m    | 60.9% | 24.2%   | 12.1%    | 2.8%      | <0.001 (2)  |
| (C) Only 12m visit           | 75    | 1m    | 36.0% | 36.0%   | 17.3%    | 10.7%     | 0.167 (1)   |
|                              | 75    | 12m   | 70.7% | 14.7%   | 10.7%    | 4.0%      | < 0.001 (2) |
| (D) 6 & 12m visit            | 263   | 1m    | 43.4% | 40.3%   | 11.8%    | 4.5%      | <0.001 (1)  |

|  |     |     |       |       |      |      |             |
|--|-----|-----|-------|-------|------|------|-------------|
|  | 263 | 6m  | 77.2% | 14.8% | 6.5% | 2.2% | < 0.001 (2) |
|  | 263 | 12m | 72.3% | 20.9% | 5.3% | 1.5% | < 0.001 (2) |
|  |     |     |       |       |      |      |             |

### Awareness

Overall awareness of hypertension status in the overall cohort was 68.5% at enrolment. Individuals who stayed in the programme longer, were more likely to be aware of their hypertension status. 70.8% of individuals who stayed in the programme for six months were aware of their hypertension status, and 73.1% of those who stayed in the programme for 12 months were aware of their hypertension status (Table 1).

### Treatment

Treatment increased between enrolment and six and twelve-month appointments. Although only 44.2% of patients were receiving any medication at enrolment, the majority were being treated at six months (90.4%) and at 12 months (92.2%). At enrolment, the majority of patients who were on treatment were taking a calcium channel blocker (CCB) (36% of all patients), but at six months the majority were on diuretics (75.9%) followed by a CCB (69.5%). The same pattern was found at 12 months with 79.8% taking diuretics, and 71.5% taking a CCB (Table 5)

In patients who had a six-month appointment, 24.1% were taking only one medication, 32% were taking two medications, and over 30% were taking more than two medications. In patients who had a 12-month appointment, 23 % were taking one medication, 32.6% were taking two medications, and over 32% were taking more than two medications.

Table 5) treatment pattern in the cohort at enrolment, six months and 12 months with p-values for differences.

| Treat         | Enrolment | 6 month | P change | 12 months | P change |
|---------------|-----------|---------|----------|-----------|----------|
| Diuretic      | 21.66%    | 75.89%  | 0.00000  | 79.83%    | <0.00001 |
| Calcium CB    | 36.07%    | 69.46%  | 0.00000  | 71.47%    | <0.00001 |
| Beta-blocker  | 3.14%     | 8.93%   | 0.00000  | 9.51%     | 0.00001  |
| ACE inhibitor | 6.72%     | 22.5%   | 0.00000  | 21.61%    | <0.00001 |
| ARB           | 2.54%     | 12.5%   | 0.00000  | 13.54%    | <0.00001 |
| Other         | 3.66%     | 15.89%  | 0.00000  | 17.87%    | <0.00001 |
| Any           | 44.29%    | 90.36%  | 0.00000  | 92.22%    | <0.00001 |

|               |        |        |         |        |          |
|---------------|--------|--------|---------|--------|----------|
| 0 medications | 55.71% | 9.64%  | 0.00000 | 7.78%  | <0.00001 |
| 1 medications | 19.42% | 24.11% | 0.21013 | 23.05% | 0.62722  |
| 2 medications | 20.46% | 31.96% | 0.00040 | 32.56% | 0.00811  |
| 3 medications | 4.18%  | 23.93% | 0.00000 | 24.78% | <0.00001 |
| 4 medications | 0.22%  | 6.96%  | 0.00000 | 8.07%  | <0.00001 |
| Mean          | 0.74   | 2.05   | 0.00000 | 2.14   | <0.00001 |

### *Control*

There was an increase in blood pressure control in patients who remained in the programme (Table 3), however patients who stayed in the programme were more likely to have their BP under control upon enrolment. In the group of patients that did not have a second appointment (group A) the baseline BP control was 25% while in the other groups (B, C, D) was 34%, 36% and 43% respectively. These differences were statistically significant (Table 4). The BP control increased to 69% (95% CI 65%-73%) in the individuals that visited at six months. In the patients that had the 12 month visit the control increased to 72% (95% CI 67%, 77%). Of patients who had both a six and 12-month follow-up appointment, the control increased to 77% (95% CI 72%-82%) at six months, but slightly decreased to 72% at 12 months (95% CI 66%-78%) (Table 3, Table 4).

## **DISCUSSION**

### **Summary of results**

Of the 1339 patients enrolled in ComHIP, only 552 (41%) had a follow up appointment at six months, and only 338 (25.2%) had a follow up appointment at twelve months, and 263 (20%) had both six and 12 month appointments. Participants who had more education, were older, had their hypertension under control at enrolment, or who had the opportunity to spend at least a year in the programme before the break in service were more likely to attend appointments at six and/or twelve months.

Among the group of patients who continued in the programme for six or twelve months, we found strong evidence of a reduction in DBP and SBP, and an increase (from under half to more than two thirds) of hypertension control. We also found strong evidence of an increase of the patients under treatment, of the number of medications received per patient, and a decrease in the number of individuals with severe hypertension.

### **Comparison with other studies**

Other studies evaluating task sharing for hypertension management have shown modest levels of success. For example, one randomised controlled study conducted in Ghana using task sharing (but with supplying free medications) showed greater reductions in SBP in patients randomised to the arm that included trained nurses, as compared to the one that just provided free medications and health insurance [10].



1  
2  
3 The poor follow-up reported in our study is not unexpected. Many studies have shown poor levels of  
4 follow up or adherence to clinic appointments. In one study conducted in three primary care clinics in  
5 Kibera, Kenya between 2010 and 2012, 1465 hypertensive or diabetic patients were identified. Of  
6 these 31% of patients were lost to follow up. Of these 55% of non-diabetic patients had their BP under  
7 control by 24 months, but only 28% of diabetic patients [11].  
8  
9

10 In another study conducted in Kibera, Kenya between 2015 and 2016, 3861 hypertensive patients  
11 were identified in health centres or clinics. of those 3069 patients did not complete six months of  
12 follow up (79%). Of those patients who remained in the programme over 6 months, they found 63%  
13 adherence to appointments [12].  
14

15 In a study conducted in the slums of Nairobi only 3.4% of participants showed completed compliance  
16 with the programme. 30% only showed up for one appointment, and 5% only had two visits. Similar  
17 to our study they found that patients who remained in the programme showed significant reductions  
18 in SBP and DBP [13].  
19  
20

21 In a study done in two sites (one rural and one urban) in Malawi, of 4075 patients referred for clinical  
22 care, only 61% attended their referral appointments. Of those 47% of hypertensive patients were still  
23 in contact after 24 months. Similar to our findings, they found uptake in care to be higher in older  
24 patients, being on anti-hypertensives prior to enrolment, and not being in employment. Unlike our  
25 study, they found that females were more likely to be retained in care .[14]  
26  
27

28 Similarly, a study of hypertensive and diabetic patients in rural Cameroon found that only 18.1% of  
29 participants were still in care after one year. However similar to our study they found significant  
30 decreases in SBP and DBP in hypertensive patients with at least two documented visits.  
31  
32  
33

### 34 **Strengths and Limitations**

35 A major strength of this study is unlike most other hypertension programmes ComHIP uses existing  
36 GHS protocols and medications and does not require outside funds or intervention for medications.  
37 This means that there is a much greater chance of long term sustainability of the programme as it  
38 does not rely on outside sources for medications.  
39  
40

41 Limitations of the study include that data were only available for encounters with service providers  
42 within the ComHIP network. Any appointments with doctors, pharmacists (licensed or un-licensed)  
43 that were not part of ComHIP would not have been registered, so it is possible that patients were  
44 obtaining anti-hypertensives from non-licensed sellers, which would not be captured in the ComHIP  
45 database. Another limitation of ComHIP was that the cohort did not have a control.  
46  
47

48 Due to the extremely poor follow-up, it is not possible to generalise our findings regarding the impact  
49 on blood pressure control to other studies, other than to emphasize the importance of effective  
50 strategies to promote follow-up. Finally, it is important to remember that nearly 70% of the initial  
51 cohort was aware of their hypertension status and about half were taking medications, which is a  
52 much higher proportion than in the general population. While this was done in ComHIP to ensure  
53 access to hypertension management to community members who otherwise would not have been  
54 able to access services, it is an important consideration when considering generalisability to the overall  
55 population.  
56  
57

### 58 **Interpretation**

59  
60

1  
2  
3 In the 25% of people who had a 12-month appointment, there was strong evidence of an increase of  
4 the patients receiving medications, the average number of medications received per patient, and the  
5 level of hypertension control, we also found a reduction in both BP and hypertension status. However,  
6 like most other studies in the region, the high loss to follow up highlights that innovative hypertension  
7 programmes such as ComHIP need to develop better ways to retain patients within the programme.  
8  
9

10 Community based hypertension programmes in resource poor setting often are complex to carry out,  
11 and are prone to poor follow-up. There are many possible reasons that follow up in our study was  
12 low.  
13

14 The factor most associated with retention in the programme was enrolment date. This is significant  
15 as due to operational issues, there was gap of CommCare utilization for three months. Anecdotally  
16 FHI 360 ComHIP staff learned that this gap in CommCare service had caused both service providers  
17 and staff to believe that the intervention had stopped, which may have resulted in a low rate of  
18 completion of follow-up appointments. Considering difficulties associated with community based  
19 studies in low resource settings, it is imperative to ensure continuity of service. Other factors that  
20 could cause this association may be health care professional fatigue; engaging patients to present for  
21 appointments may require considerable effort, such as multiple phone calls and personal interaction,  
22 for which the CVD nurses did not receive additional monetary compensation. It is possible that over  
23 time, the enthusiasm of the CVD nurses for the intervention may have waned. Also, as in any low –  
24 resource settings, there is a great deal of workforce turnover, FHI 360 recognised this early in the  
25 implementation and trained extra staff to bridge the gaps, however it is still possible that new health  
26 care providers who replaced them may not have had the same level of training. A complementary  
27 component of the evaluation which includes qualitative research with different ComHIP stakeholders  
28 is underway to analyse in depth the possible reasons that may have caused people to not adhere to  
29 the programme. (see Adler et al Barriers and facilitators to the implementation of a community-based  
30 hypertension improvement project in Ghana: A qualitative study and Laar et al Health system  
31 challenges to hypertension and related non-communicable diseases prevention and treatment:  
32 perspectives from Ghanaian stakeholders)  
33  
34  
35  
36  
37

38 Lastly, our study found that older individuals were more likely to continue in care, this was found in at  
39 least one other study[14] but was not reported on in most studies. This could be because older  
40 patients may have more time to attend clinics. Patients with their hypertension under control were  
41 about twice as likely to stay in the programme. This is not surprising as they had already exhibited  
42 better health seeking behaviours.  
43  
44

#### 45 **Recommendations:**

46 For patients enrolled and who continued in the programme we found an important impact on the  
47 management of hypertension and in blood pressure control. However, the high loss to follow-up of  
48 patients recruited limits the potential public health impact of these types of programmes. In order to  
49 minimize the impact of externalities (such as the CommCare service gap in ComHIP) programmes  
50 should have standard procedures and back-up systems to maximize the possibility that patients stay  
51 in the programme, particularly younger and less educated individuals. Also, appropriate incentives  
52 should be put in place to keep programme staff fully engaged and avoid programme fatigue. Future  
53 studies should further identify causes of loss to follow-up and find effective ways to adapt  
54 programmes accordingly (e.g. access to treatment within the community, targeted behaviour change  
55 messaging) to ensure that most of patients recruited stay long term in the programme. Future  
56 research may also want to focus on more difficult to reach patients who have lower levels of  
57 awareness and treatment on enrolment.  
58  
59  
60

### Acknowledgements

Funding for ComHIP was generously provided by the Novartis Foundation, Basel, Switzerland. We are grateful to all of cohort clients. We are also grateful to the leadership and political support of the Ghana Health Service (both from the national and district levels) for their support.

### Competing interests

Co-authors PL, AKL, PP, AJA, and DP-M worked on the ComHIP Programme for which their institutions (LSHTM and UGSPH) have received grants from the Novartis Foundation. Co-authors RD, RD, and DM are staff of the FHI360, which provided technical direction to ComHIP implementation.

### Authors' contributions

PL conceived of the project, PL and RD designed the interventions. PL, PP, AKL and AJA designed the research component of the project. DM, and RMMD supervised the implementation of the programme. RMMD is the programme data manager. AJA and DP-M performed the statistical analyses. AJA drafted the manuscript, with inputs from all authors. All authors read and approved the final version of the manuscript.

### Consent to publish

Participants' consent was obtained for the purposes of publishing the results from the study. All the authors consented to the study results to be published in the form presented in the final version of this manuscript.

### Data sharing

Summary statistics related to the dataset used in the project are available by request

### Funding

Funds for the project was made available by Novartis Foundation, Basel, Switzerland. They did not have any input or control over this manuscript.

### Figures

See attached supplementary file

### REFERENCES

1. WHO, *World Health Organization-International Society of Hypertension Guidelines for the Management of Hypertension. Guidelines Subcommittee*. Am J Hypertens, 1999. **17**(2): p. 151–83.
2. Collaboration, B.P.L.T.T., *Effects of blood pressure lowering on cardiovascular risk according to baseline body-mass index: a meta-analysis of randomised trials*. The Lancet, 2015. **385**(9971): p. 867-874.
3. Collins, R., et al., *Blood pressure and coronary heart disease*. Lancet, 1990. **336**(8711): p. 370-1.
4. Law, M.R., J.K. Morris, and N.J. Wald, *Use of blood pressure lowering drugs in the prevention of cardiovascular disease: meta-analysis of 147 randomised trials in the context of expectations from prospective epidemiological studies*. Bmj, 2009. **338**: p. b1665.

- 1
  - 2
  - 3
  - 4
  - 5
  - 6
  - 7
  - 8
  - 9
  - 10
  - 11
  - 12
  - 13
  - 14
  - 15
  - 16
  - 17
  - 18
  - 19
  - 20
  - 21
  - 22
  - 23
  - 24
  - 25
  - 26
  - 27
  - 28
  - 29
  - 30
  - 31
  - 32
  - 33
  - 34
  - 35
  - 36
  - 37
  - 38
  - 39
  - 40
  - 41
  - 42
  - 43
  - 44
  - 45
  - 46
  - 47
  - 48
  - 49
  - 50
  - 51
  - 52
  - 53
  - 54
  - 55
  - 56
  - 57
  - 58
  - 59
  - 60
5. Olsen, M.H., et al., *A call to action and a lifecourse strategy to address the global burden of raised blood pressure on current and future generations: the Lancet Commission on hypertension*. *Lancet*, 2016. **388**(10060): p. 2665-2712.
6. Addo, J., L. Smeeth, and D.A. Leon, *Hypertension in sub-saharan Africa: a systematic review*. *Hypertension*, 2007. **50**(6): p. 1012-8.
7. Chow, C.K., et al., *Prevalence, awareness, treatment, and control of hypertension in rural and urban communities in high-, middle-, and low-income countries*. *Jama*, 2013. **310**(9): p. 959-68.
8. Lamptey, P., et al., *Evaluation of a community-based hypertension improvement program (ComHIP) in Ghana: data from a baseline survey*. *BMC Public Health*, 2017. **17**(1): p. 368.
9. GSS, *Population by Region, District, Locality of Residence, Age Groups and Sex, 2010*. Accra, Ghana: Ghana Statistical Service. [http://www.statsghana.gov.gh/docfiles/population\\_by\\_region\\_district\\_locality\\_of\\_residence\\_age\\_groups\\_and\\_sex\\_2010.pdf](http://www.statsghana.gov.gh/docfiles/population_by_region_district_locality_of_residence_age_groups_and_sex_2010.pdf). Accessed November 22, 2016 2012.
10. Ogedegbe, G., et al., *Health insurance coverage with or without a nurse-led task shifting strategy for hypertension control: A pragmatic cluster randomized trial in Ghana*. *PLoS Med*, 2018. **15**(5): p. e1002561.
11. Sobry, A., et al., *Caseload, management and treatment outcomes of patients with hypertension and/or diabetes mellitus in a primary health care programme in an informal setting*. *Trop Med Int Health*, 2014. **19**(1): p. 47-57.
12. Kuria, N., et al., *Compliance to follow up and adherence to medication in hypertensive patients in an urban informal settlement in Kenya: comparison of three models of care*. *Trop Med Int Health*, 2018.
13. Werner, M.E., et al., *Results of a hypertension and diabetes treatment program in the slums of Nairobi: a retrospective cohort study*. *BMC Health Services Research*, 2015. **15**: p. 512.
14. Musicha, C., et al., *Assessing clinical services and retention in care following screening for hypertension and diabetes among Malawian adults: an urban/rural comparison*. *J Hypertens*, 2016. **34**(11): p. 2172-9.

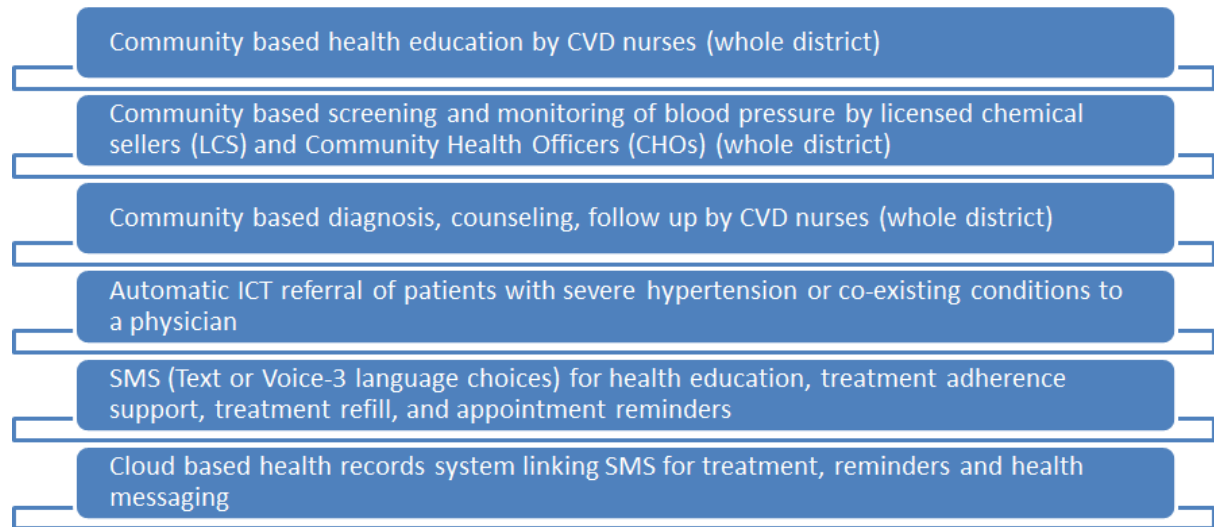

Supplementary figure 1) components of the ComHIP Programme

| Visit Number                     | When?                                                                                                                                                                                                                                                                                        | Activity                                                                                                                                                                                                                                                                                                                                                                                                                                  |
|----------------------------------|----------------------------------------------------------------------------------------------------------------------------------------------------------------------------------------------------------------------------------------------------------------------------------------------|-------------------------------------------------------------------------------------------------------------------------------------------------------------------------------------------------------------------------------------------------------------------------------------------------------------------------------------------------------------------------------------------------------------------------------------------|
| <b>1</b>                         | After patient has been screened and referred by LCS, CHO                                                                                                                                                                                                                                     | CVD Nurse to recheck BP                                                                                                                                                                                                                                                                                                                                                                                                                   |
| <b>2</b>                         | Two weeks after visit 1                                                                                                                                                                                                                                                                      | <ol style="list-style-type: none"> <li>1. CVD Nurse to recheck BP and confirm diagnosis</li> <li>2. Enroll patient, perform risk assessment, perform anthropometric measurements</li> <li>3. Refer to <i>Referral SOP for CVD nurse</i> for all patients that should be referred to Physician.</li> <li>4. Initiate treatment</li> <li>5. Order laboratory investigation as needed</li> <li>6. Perform Hypertension counseling</li> </ol> |
| <b>3</b>                         | 6 weeks after visit 2                                                                                                                                                                                                                                                                        | <ol style="list-style-type: none"> <li>1. Re-check BP</li> <li>2. Assess treatment, perform counseling</li> </ol>                                                                                                                                                                                                                                                                                                                         |
| <b>4</b>                         | 6 weeks after visit 3                                                                                                                                                                                                                                                                        | <ol style="list-style-type: none"> <li>1. Review treatment plan until goal is reached</li> <li>2. Perform anthropometric measurements every 3 months after enrollment</li> </ol>                                                                                                                                                                                                                                                          |
| <b>5 &amp; subsequent visits</b> | <ul style="list-style-type: none"> <li>• Every 3 months for patients with Mild Hypertension (treated by CVD nurse)</li> <li>• Every 2 months for patient with Moderate Hypertension (treated by CVD nurse)</li> <li>• Monthly for Patients with High (treated by Physicians only)</li> </ul> | <ol style="list-style-type: none"> <li>1. Re-check BP, review treatment, assess for risk factors, perform Hypertension counseling</li> <li>2. Conduct follow up assessment every 6 months after enrollment</li> </ol>                                                                                                                                                                                                                     |

Supplementary Figure 2. guidelines for patient visits

| Phase                                       | Activity                                | Community Health Officer | Licensed Chemical Seller | CVD Nurse | Physician |
|---------------------------------------------|-----------------------------------------|--------------------------|--------------------------|-----------|-----------|
| Phase 1: Screening                          | Community BP screening                  | Yes                      | Yes                      | No        | No        |
|                                             | Screening referral                      | Yes                      | Yes                      | No        | No        |
| Phase 2: Diagnostic Evaluation              | Confirmation of BP (HTN) diagnosis      | No                       | No                       | Yes       | Yes       |
|                                             | Staging of degree of HTN                | No                       | No                       | Yes       | Yes       |
|                                             | Assessment of other CVD risk factors    | No                       | No                       | Yes       | Yes       |
|                                             | Assessment of prevailing CVD symptoms   | No                       | No                       | Yes       | Yes       |
|                                             | Overall risk assessment/ Stratification | No                       | No                       | Yes       | Yes       |
|                                             | Assessment of family history of CVD     | No                       | No                       | Yes       | Yes       |
|                                             | Laboratory investigation                | No                       | No                       | Yes       | Yes       |
|                                             | Assessment of target organ complication | No                       | No                       | Yes       | Yes       |
|                                             | Assessment of Lifestyle Issues          | No                       | No                       | Yes       | Yes       |
|                                             | Diagnostic referral                     | No                       | No                       | Yes       | No        |
| Phase 3: Management, Monitoring & Follow Up | Baseline Anthropometry                  | No                       | No                       | Yes       | Yes       |
|                                             | Recommendation for drug treatment       | No                       | No                       | Yes       | Yes       |
|                                             | Medication Dispensing                   | No                       | Yes                      | No        | No        |
|                                             | Recommendation for Non-drug treatment   | Yes                      | Yes                      | Yes       | Yes       |
|                                             | Evaluation of drug side effects         | No                       | Yes                      | Yes       | Yes       |
|                                             | Monitoring of BP response to treatment  | No                       | Yes                      | Yes       | Yes       |
|                                             | Adherence Counselling                   | No                       | Yes                      | Yes       | Yes       |
|                                             | Anthropometric monitoring               | No                       | No                       | Yes       | Yes       |
|                                             | Regular follow up and interaction       | No                       | No                       | Yes       | No        |
| Management referral                         | No                                      | No                       | Yes                      | Yes*      |           |

Supplementary Table 1) Summary of roles of various service delivery personnel

\*In rare instances, certain patients may be referred by the Physician to a hypertension specialist

- I. Diuretic: Bendroflumethiazide. –initial dose, 2.5mg daily. Maximum dose of 5mg daily.
- II. Beta-blocker: Atenolol-initial dose of 50mg daily. Maximum dose of 100mg daily provided the heart rate is greater than 60/min on the lower dose.
- III. Calcium channel blocker: Nifedipine retarde or XL -initial dose 30mg daily. Maximum dose of 60 to 90 mg daily.

Supplementary Table 2) Recommended medications and dosages

1  
2  
3  
4  
5  
6  
7  
8  
9  
10  
11  
12  
13  
14  
15  
16  
17  
18  
19  
20  
21  
22  
23  
24  
25  
26  
27  
28  
29  
30  
31  
32  
33  
34  
35  
36  
37  
38  
39  
40  
41  
42  
43  
44  
45  
46  
47  
48  
49  
50  
51  
52  
53  
54  
55  
56  
57  
58  
59  
60

# Community-based Hypertension Improvement Project (COMHIP)

## Clinical Guidelines

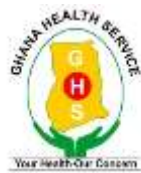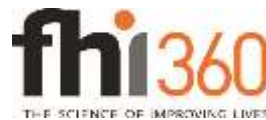

09.2015

## SUMMARY

- ⊗ This clinical guideline on the management of Hypertension is intended to promote evidence-based management of hypertension in the community and thereby improve patient's clinical outcomes.
- ⊗ The guideline is intended to assist Licensed Chemical Sellers (LCS), Community Health Officers (CHOs), Cardiovascular Disease (CVD) Nurses and Physicians in the screening and diagnosis of HTN, determination of appropriate treatment, and delivery of individualized pharmacological and non-drug interventions.
- ⊗ This guideline is general for the ComHIP project and individualized guidelines have been developed for the various service delivery personnel matching their responsibilities.



## Table of Contents

|                                                                                                  |    |
|--------------------------------------------------------------------------------------------------|----|
| SUMMARY .....                                                                                    | 2  |
| 1.0 PROJECT DESCRIPTION .....                                                                    | 4  |
| 2.0 SUMMARY OF PERSONNEL ROLE .....                                                              | 5  |
| 3.0 SCREENING .....                                                                              | 6  |
| 3.1 Hypertension Definition and Classification .....                                             | 6  |
| 3.2 BP Screening Protocol .....                                                                  | 6  |
| 4.0 DIAGNOSIS AND EVALUATION .....                                                               | 7  |
| 4.1 Objectives of diagnostic evaluation .....                                                    | 7  |
| 4.2 Confirmation of hypertension diagnosis .....                                                 | 7  |
| 4.3 Grading of the Severity of Hypertension .....                                                | 7  |
| 4.4 Assessment for other CVD risk factors .....                                                  | 7  |
| 4.5 Assessment for Target Organ Damage or CVD Event .....                                        | 8  |
| 4.6 Assessment of Family History .....                                                           | 8  |
| 4.7 Assessment of ongoing CVD symptoms .....                                                     | 8  |
| 4.8 Anthropometric assessment .....                                                              | 8  |
| 4.81 Weight .....                                                                                | 8  |
| 4.82 Height .....                                                                                | 9  |
| 4.83 Waist Circumference .....                                                                   | 9  |
| 4.9 Assessment for signs of CVD .....                                                            | 10 |
| 4.10 Risk stratification .....                                                                   | 10 |
| 4.11 Laboratory Investigations .....                                                             | 11 |
| 5.0 MANAGEMENT, MONITORING AND FOLLOW UP .....                                                   | 12 |
| 5.1 BP Treatment Goal .....                                                                      | 12 |
| 5.2 Recommendations for Non-drug Treatment .....                                                 | 12 |
| 5.3 Recommendation for drug treatment .....                                                      | 12 |
| 5.4 Types of Antihypertensive drugs .....                                                        | 12 |
| 5.5 Titration of antihypertensive medications (CVD Nurses): Low and Moderate risk patients ..... | 13 |
| 5.6 Titration of antihypertensive medications (Physicians): High risk patients .....             | 13 |
| 5.7 General Prescribing Guideline .....                                                          | 14 |
| 5.8 Side Effect Monitoring .....                                                                 | 14 |
| 5.9 monitoring of response to treatment .....                                                    | 14 |
| 5.10 General dispensing Guideline (For LCS only) .....                                           | 15 |
| 5.11 Hypertensive Emergencies .....                                                              | 15 |
| 5.12 Referral SOP for CVD nurse .....                                                            | 15 |
| 5.13 Proposed activities for patients' visit .....                                               | 16 |
| 6.0 SCREENING AND DIAGNOSIS ALGORITHM .....                                                      | 17 |
| 7.0 MANAGEMENT FLOW ALGORITHM .....                                                              | 18 |
| 7.0 APPENDIX .....                                                                               | 19 |
| 7.1 Summary of GHS and NHIA approved drugs .....                                                 | 19 |
| 7.2 Drug Management Flow diagram for CVD nurses .....                                            | 20 |

## 1.0 PROJECT DESCRIPTION

☒ The community-based Hypertension Improvement Project (ComHIP), aims to improve hypertension management and control in Ghana. The project will test a community-based model that engages the private sector and utilizes information and communication technologies (ICTs) to enhance the capacity of the Ghana Health Service and individuals to control hypertension. There are four (4) categories of personnel (Figure 1) involved in service delivery in ComHIP. These are;

- Community Health Officers
- Licensed Chemical Sellers
- Cardiovascular disease nurses
- Physicians

☒ Community Health Officers (CHOs) will screen community members; Licensed Chemical Sellers (LCS) will screen clients and contribute to management and follow up of hypersensitive clients; cardiovascular nurses (CVD nurses) will be responsible for confirming hypertension diagnosis, grading and management of clients with mild and forms of hypertension; Physicians will be responsible mainly for managing severe hypertensive clients.

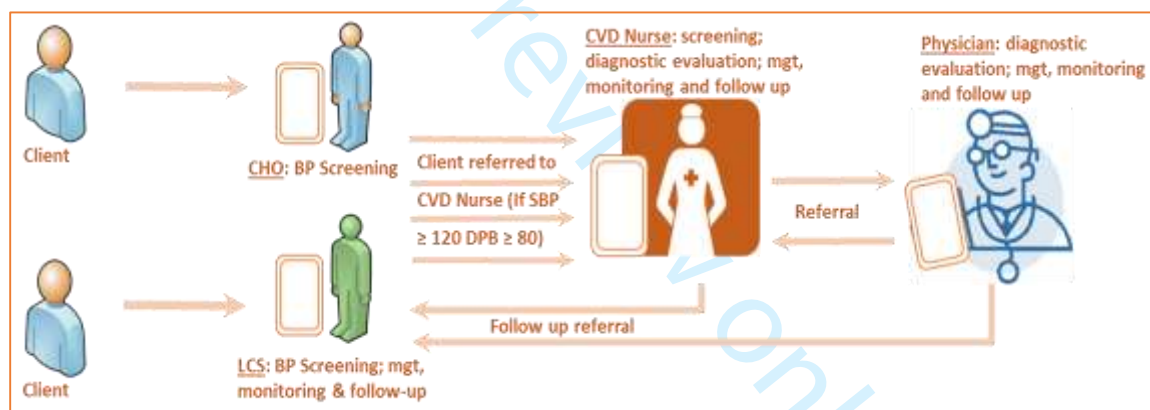

Figure 1: ComHIP Service delivery flow

☒ ComHIP involves the Ghana Health Service, FHI 360, London School of Hygiene and Tropical Medicine, University of Ghana School of Public Health, VOTO Mobile and with funding support from the Novartis Foundation. The project is for a period of 36 months.

## 2.0 SUMMARY OF PERSONNEL ROLE

☒ Table 1 summarizes the various functions of licensed chemical sellers (LCS), community health officers (CHOs), cardiovascular disease nurses and Physicians working in ComHIP.

Table 1: Summary of roles of various service delivery personnel

| Phase                                       | Activity                                | Community Health Officer | Licensed Chemical Seller | CVD Nurse | Physician |
|---------------------------------------------|-----------------------------------------|--------------------------|--------------------------|-----------|-----------|
| Phase 1: Screening                          | Community BP screening                  | Yes                      | Yes                      | No        | No        |
|                                             | Screening referral                      | Yes                      | Yes                      | No        | No        |
| Phase 2: Diagnostic Evaluation              | Confirmation of BP (HTN) diagnosis      | No                       | No                       | Yes       | Yes       |
|                                             | Staging of degree of HTN                | No                       | No                       | Yes       | Yes       |
|                                             | Assessment of other CVD risk factors    | No                       | No                       | Yes       | Yes       |
|                                             | Assessment of prevailing CVD symptoms   | No                       | No                       | Yes       | Yes       |
|                                             | Overall risk assessment/ Stratification | No                       | No                       | Yes       | Yes       |
|                                             | Assessment of family history of CVD     | No                       | No                       | Yes       | Yes       |
|                                             | Laboratory investigation                | No                       | No                       | Yes       | Yes       |
|                                             | Assessment of target organ complication | No                       | No                       | Yes       | Yes       |
|                                             | Assessment of Lifestyle Issues          | No                       | No                       | Yes       | Yes       |
|                                             | Diagnostic referral                     | No                       | No                       | Yes       | No        |
| Phase 3: Management, Monitoring & Follow Up | Baseline Anthropometry                  | No                       | No                       | Yes       | Yes       |
|                                             | Recommendation for drug treatment       | No                       | No                       | Yes       | Yes       |
|                                             | Medication Dispensing                   | No                       | Yes                      | No        | No        |
|                                             | Recommendation for Non-drug treatment   | Yes                      | Yes                      | Yes       | Yes       |
|                                             | Evaluation of drug side effects         | No                       | Yes                      | Yes       | Yes       |
|                                             | Monitoring of BP response to treatment  | No                       | Yes                      | Yes       | Yes       |
|                                             | Adherence Counselling                   | No                       | Yes                      | Yes       | Yes       |
|                                             | Anthropometric monitoring               | No                       | No                       | Yes       | Yes       |
| Regular follow up and interaction           | No                                      | No                       | Yes                      | No        |           |
| Management referral                         | No                                      | No                       | Yes                      | Yes*      |           |

\*In rare instances, certain patients may be referred by the Physician to a hypertension specialist

## 3.0 SCREENING

### 3.1 Hypertension Definition and Classification

Hypertension is used to refer to the level of blood pressure (BP) above which treatment does more good than harm. Numerically, hypertension is defined as a systolic blood pressure (SBP)  $\geq 140$  mmHg or a diastolic blood pressure (DBP) of  $\geq 90$  mmHg. The following BP classification has been adopted;

Table 2: Classification of blood pressure for adults aged  $\geq 18$  years

| BP Classification               | Systolic BP (mmHg) |     | Diastolic BP (mmHg) |
|---------------------------------|--------------------|-----|---------------------|
| Normal                          | <120               | and | <80                 |
| Pre-Hypertension*               | 120-139            | or  | 80-89               |
| Grade 1 Hypertension (Mild)     | 140-159            | or  | 90-99               |
| Grade 2 Hypertension (Moderate) | 160-179            | or  | 100-109             |
| Grade 3 Hypertension (Severe)   | $\geq 180$         | or  | $\geq 110$          |

\*Pre-hypertension: This refers to patients with very real risk of developing chronic high blood pressure

### 3.2 BP Screening Protocol

- A. Who should conduct screening?** LCS, Community Health Officer (CHO)
- B. Who is Eligible to be screened?** Any adult in the community 18 years and older excluding pregnant women.
- C. Where can Screening be done?** LCS will conduct screening at their shops. CHOs will conduct screening at CHPS compounds and during outreach/home visits.
- D. How should BP be measured?** All personnel involved in ComHIP should adopt simple techniques that minimize BP measurement errors: The following are recommended;
  - i. Ensure a quiet environment
  - ii. Patient must be rested for at least 5 minutes, quiet and comfortable.
  - iii. Patient must be seated with arm at heart level and feet flat on the floor
  - iv. Ensure that sleeves are rolled up or any tight clothing removed.
  - v. Ensure that the individual has not exercised, smoked or consumed foods, alcohol or drinks containing caffeine (such as tea or coffee) at least 30 minutes before measurements
  - vi. Ensure that client is not acutely ill or injured
  - vii. Use appropriate size cuff (E.g. too small a cuff can raise BP)
  - viii. Measure BP in both arms at first; then subsequently only measure in the arm which gave the higher reading.
  - ix. Each time BP is to be measured, 3 readings must be taken at least 3 minutes apart.
  - x. Refer to BP measurement guide whenever unsure.
- E. What to do with BP reading?**
  - I. All clients with BP  $\geq 140/90$  mmHg must be referred to CVD nurse. Clients with BP in the Pre-hypertension range must be counselled on lifestyle and encourage to check BP regularly.
  - II. For clients with BP  $\geq 180/110$  stress the need for urgent/immediate visit to a CVD nurse and arrange this visit with the CVD nurse.

⊗ Remember to explain to client that Screening is not diagnosis. Further investigation would be needed even if you suspect that the high BP may be hypertension.

## 4.0 DIAGNOSIS AND EVALUATION

### 4.1 Objectives of diagnostic evaluation

There are four key objectives in the assessment of a person with suspected hypertension are;

- 1) To confirm whether or not blood pressure is elevated
- 2) To document the presence or absence of blood pressure related target organ damage (e.g. left ventricular hypertrophy, hypertensive retinopathy, increased albumin: creatinine ratio);
- 3) To evaluate the person's cardiovascular risk either due to established cardiovascular disease or high cardiovascular disease risk states (e.g. diabetes or CKD), or by calculation of their 10 year CVD risk estimate
- 4) To consider whether there may be secondary causes for the hypertension.

### 4.2 Confirmation of hypertension diagnosis

**A. Who should confirm HTN diagnosis?** For most cases CVD nurse would confirm hypertension status and grade severity. In few instances, Physicians would do this for referred clients.

**B. How should BP (HTN) be confirmed?** The Following steps are recommended Use two measurements obtained two weeks apart.

- i. At each visit, take 3 BP readings and record the mean
- ii. Systolic equal or greater than 140 and or diastolic equal or greater than 90 (use mean of the readings obtained at the three separate visits)
- iii. For clients with initial BP in grade 3, CVD nurse must provide immediate starting dose and refer to physician

### 4.3 Grading of the Severity of Hypertension

**A. Who should grade severity of hypertension? Usually** CVD nurse will be responsible for grading patients, Physicians will confirm severe hypertension grade.

**B. How should HTN severity be graded?** Use [Table 2 \(page 6\)](#) to grade level of severity.

**C. Are there any referrals needed?**

- I. YES, CVD nurse must refer all patients with severe hypertension to a Physician.
- ☒ All confirmed patients 18-30yrs must be referred for further investigation by a physician to rule out possible secondary causes.

### 4.4 Assessment for other CVD risk factors

**A. Who should conduct assessment of CVD risk factors?** CVD nurse, Physician

**B. How should CVD risk factors be assessed?** A set of questions are useful in assessing CVD risk factors. Usually a Yes or No response is required from clients by asking the following;

- i. Have you had prior history of diabetes or hypertension?
- ii. Have you had prior history of elevated serum lipids
- iii. Do you currently smoke tobacco on a daily basis, less than daily, or not at all?
- iv. In a typical week, how many minutes do you spend engaging in vigorous/high intensity physical work, activities or exercises?
- v. Do you drink alcohol?
- vi. Have you had prior history of high cholesterol

#### 4.5 Assessment for Target Organ Damage or CVD Event

- A. Who should conduct assessment for TOD/CVD events?** CVD nurse, Physician
- B. How should TOD/CVD event assessment be done?** A yes or No responses are usually needed from patients upon asking the following questions;
- i. Have you had prior history of heart failure
  - ii. Have you had prior history of heart attack
  - iii. Have you had prior history of a stroke or Transient Ischemic Attack (Mini stroke)
  - iv. Have you had prior history of kidney failure or disease

#### 4.6 Assessment of Family History

- A. Who should conduct assessment of family history?** CVD nurse, Physician
- B. How should family history assessment be done?** Enquire from patient about history of any CVD event (stroke, heart attack) in parents and siblings; especially at age of less than 50.

#### 4.7 Assessment of ongoing CVD symptoms

- A. Who should conduct assessment of prevailing CVD symptoms?** CVD nurse, Physician
- B. How should ongoing CVD symptoms be assessed?** Enquire from patient to obtain a Yes or No answer using set of questions below;
- i. Ask about exertional dyspnea or at rest
  - ii. Ask about sleep disturbance by shortness of breath
  - iii. Ask about sleeping with more pillows of preference to sleep in a chair
  - iv. Ask about cough or wheezing during sleep.
  - v. Ask about excessive tiredness.
  - vi. Ask about central severe chest pain that disables the patient.
  - vii. Ask about feeling weak or wanting to faint
  - viii. Ask about palpitations
  - ix. Ask about loss of consciousness, vision, or speech.
  - x. Ask about weakness or numbness of one side of the body.
  - xi. Ask about swelling of feet and legs.

#### 4.8 Anthropometric assessment

- A. Who should conduct anthropometric measurements?** CVD nurse, Physician
- B. What anthropometric measurements should be assessed?** Weight, Height, Waist Girth. Calculate BMI
- C. When should measurements be taken?** Obtain accurate measurements during enrollment, thereafter every three months.
- D. How should anthropometric measurements be conducted?** Follow recommended techniques below for each assessment;

##### 4.81 Weight

This should be measured using a weighing scale. Follow the following steps;

- I. Before each measurement, make sure the scale is zero
- II. Ask the patient to remove heavy outer clothing (e.g. coats, jackets, shoes etc.)
- III. Ask the patient to stand motionless in the middle of the scale platform with the feet slightly apart and the body weight distributed equally on both feet.
- IV. Record body mass to nearest 0.1 Kg
- V. Ask patient to step off scale

- 1
- 2
- 3 VI. Repeat steps
- 4 VII. If the 2 measurements differ by more than 0.4 kg then repeat steps one more
- 5 VIII. If two measurement record the average value. If three measurements record the median
- 6 value.
- 7
- 8 IX. Refer to Weight measurement guide
- 9

#### 10 4.82 Height

11 This should be measured using a Stadiometer. Follow the following steps;

- 12
- 13 • Ask the subject to stand on the centre of the base with their back to the stadiometer
- 14 • Ask them to put their feet together and move back until their heels touch the bottom of
- 15 the stadiometer upright.
- 16 • Their buttocks and upper part of their back should also be touching the stadiometer
- 17 upright. Their head does not have to touch the stadiometer.
- 18 • The respondent's head should be in the Frankfort plane.
- 19 • This is achieved when the lower edge of the eye socket (the Orbitale) is horizontal with the
- 20 Trasion [see appendix 5.5].
- 21 • The vertex will be the highest point on their head. If their head is not aligned properly,
- 22 (and for most respondents it probably won't be), ask them to raise or lower their chin until
- 23 it is in the Frankfort Plane.
- 24 • When you are happy that the respondent is in the correct position, ask them to take a
- 25 deep breath and hold it.
- 26 • Lower the headboard until it is in contact with the head. Compress the hair if needed.
- 27 Make sure you don't bend the headboard from the horizontal, nor move the respondent's
- 28 head.
- 29 • Hold the headboard firmly at its final position and take the reading to the nearest 0.1 cm.
- 30 • When you have completed the reading, ask the respondent to step away from the
- 31 stadiometer.
- 32 • Record measurements immediately.
- 33 • Refer to height measurement guide for more details
- 34
- 35
- 36
- 37
- 38

#### 39 4.83 Waist Circumference

40 This should be measured using a tape measure. Follow the following steps;

- 41
- 42 • Ask the patient to place himself in the following manner: Clear the abdominal region, Feet
- 43 shoulder-width apart, Arms crossed over the chest
- 44 • It is suggested to kneel down to the right of the patient in order to measure waist girth;
- 45 palpate the patient's hips to locate the top of the iliac crest and Draw a horizontal line
- 46 halfway between the patient's back and abdomen.
- 47 • Place the measuring tape horizontally around the patient's abdomen. To work
- 48 comfortably, it is suggested to wrap the tape around the patient's legs and then move it
- 49 up.
- 50 • Align the bottom edge of the tape with your marked point. Gently tighten the tape around
- 51 the patient's abdomen without depressing the skin.
- 52 • It is suggested to request the patient to relax and breathe normally (abdominal muscles
- 53 should not be contracted). Ask the patient to take 2 or 3 normal breaths. Measure from
- 54 the zero line of the tape (to the nearest millimetre) at the end of a normal expiration
- 55
- 56
- 57
- 58
- 59
- 60

#### 4.9 Assessment for signs of CVD

**A. Who should conduct assessment for signs of CVD?** CVD nurse, Physician

**B. How should assessment for signs of CVD be conducted?**

- i. Note a significant difference (>15mmHg) systolic BP in the arms (Nurse & Physician)
- ii. Listen to the neck for bruits (Physician)
- iii. Feel for irregularity of the radial pulse; also for rates greater than 100bpm. (Nurse & Physician)
- iv. Check for displacement of the apex beat. (Physician)
- v. Listen to the heart for normal and abnormal sounds (Physician)
- vi. Listen to the back of the chest for Crepitation (Physician)
- vii. Look and feel for swelling of the legs and feet (Nurse & Physician)

#### 4.10 Risk stratification

**A. Who should conduct overall risk assessment/stratification?** CVD nurse, Physician

**B. What are the general considerations to grade overall risk?** Make consideration of the following in grading overall patient risk.

- i. Consider the severity of the hypertension (Refer to table 3 below)
- ii. Consider the other CVD risk factors of the patient
- iii. Consider any target organ damage\*

Table 3: Grading of blood pressure values

| BP ranges | Pre-Hypertension                   |                                         | Grade 1                  | Grade 2                    | Grade 3              |
|-----------|------------------------------------|-----------------------------------------|--------------------------|----------------------------|----------------------|
|           | Normal<br>SPB 120–129<br>DBP 80–84 | High normal<br>SPB 130–139<br>DPB 85–89 | SPB 140–159<br>DPB 90–99 | SPB 160–179<br>DBP 100–109 | SBP ≥180<br>DBP ≥110 |

#### ⊗ Risk Factors

The following risk factors are included in the risk stratification.

- Men aged >55 years
- Women aged >65 years
- Smoking
- Dyslipidemia
- Family history of premature cardiovascular disease (men aged <55 years, women aged <65 years)
- Abdominal obesity (abdominal circumference ≥102 cm for men, ≥88 cm for women)

#### ⊗ Comorbidities

The following conditions are included where possible in the overall risk assessment;

- Cerebrovascular disease (TIA, stroke) (Nurse & Physician)
- Heart disease (angina, myocardial infarction, heart failure) (Nurse & Physician)
- Chronic renal disease (Nurse & Physician)
- Peripheral vascular disease (Physician)
- Diabetes (Nurse, Physician)



Table 4: CVD Risk stratification for patients

|                      |                                                                                                                                                                                     |
|----------------------|-------------------------------------------------------------------------------------------------------------------------------------------------------------------------------------|
| <b>High Risk</b>     | <ul style="list-style-type: none"> <li>• Grade 3 BP, with or without TOD, risk factors and Comorbidities</li> <li>• Grade 2 BP with TOD and/or +2 risk factors</li> </ul>           |
| <b>Moderate risk</b> | <ul style="list-style-type: none"> <li>• Grade 2 BP without TOD, &gt;2 risk factor or comorbidities</li> <li>• Grade 1 with TOD and/or &gt;2 risk factors, comorbidities</li> </ul> |
| <b>Low risk</b>      | <ul style="list-style-type: none"> <li>• Grade1 BP with no TOD, risk factors or co-morbidities</li> </ul>                                                                           |

**\*TOD** is used to refer to damage occurring in major organs fed by the circulatory system (heart, kidneys, brain, eyes) which can sustain damage due to uncontrolled hypertension. TOD will be assessed by history, physical examination and laboratory investigation. However, TOD will mainly be clinically determined as this will be the usual or expected level of care in the study area. Specific TODs will be assessed as below;

**a) Heart Failure criteria for assessment;**

- paroxysmal nocturnal dyspnea
- orthopnea
- nocturnal cough or wheezing
- sinus tachycardia
- leg and pedal edema
- Objective tests : ECG evidence of left ventricular hypertrophy (LVH)

**b) Kidney damage:**

- To be assessed with tests- proteinuria and serum creatinine or prior diagnosis of same. Subjective symptoms: Polyuria, nocturia, haematuria

**c) Brain damage:**

- To be clinically assessed- symptoms of stroke or prior documentation of a stroke.

**d) Eye damage**

- Examine the fundi for the presence of hypertensive retinopathy. Subjective signs: impaired vision

#### 4.11 Laboratory Investigations

**A. Who can order for laboratory investigation?** CVD nurse, Physician

**B. What laboratory investigations are recommended?**

- Physician should prioritize the following investigations;
  - I. Complete blood count
  - II. Fasting sugar, HbA1c, and lipids
  - III. Urinalysis
  - IV. Renal profile.
  - V. Electrocardiogram (ECG)
- CVD nurse should prioritize the following investigations;
  - I. ECG
  - II. Fasting blood sugar

**C. Laboratory prioritization for different risk profiles**

- Low Risk: ECG (Nurse)
- Moderate risk: Glucometer FBS, ECG (Nurse)
- High risk: Full range (Physician)

## 5.0 MANAGEMENT, MONITORING AND FOLLOW UP

### 5.1 BP Treatment Goal

- A. **Who should outline BP treatment goal?** CVD nurse, Physician
- B. **What BP treatment goal should be set for a patient?** The goal of treatment is to bring all patients to below 140/90mmHg

### 5.2 Recommendations for Non-drug Treatment

- A. **Who should make recommendations for non-drug treatment?** CVD nurse and Physicians should make recommendations, LCS should reinforce such recommendations
- B. **Who are the candidates for non-drug treatment?** Non-drug measures should be recommended for all clients diagnosed as pre-hypertensive and hypertensive.
- C. **What non-drug approaches should be recommended?** Prioritize the following;
  - i. Maintenance of Ideal body Weight
  - ii. Healthy low salt and Low fat diet
  - iii. Increased fruit and vegetable consumption
  - iv. No more than two drinks a day
  - v. No smoking
  - vi. Regular aerobic exercise; simple daily brisk walk for thirty minutes
  - vii. Adequate management of stress and anxiety levels

### 5.3 Recommendation for drug treatment

- A. **Who should make recommendations for drug treatment?** CVD nurse, Physician
- B. **Which clients are candidates for drug therapy?** All enrolled clients (BP  $\geq$ 140/90mmHg) are candidates for drug therapy supplemented with lifestyle modification irrespective of risk level.
- C. **Should treatment be initiated with monotherapy or multiple drugs?** The decision to begin with a single or dual drugs rests principally on the level at which the clients BP is above goal and on patients overall risk profile. Typically;
  - i. Begin with a SINGLE drug if BP <20/10mmHg above goal and in low risk patients.
  - ii. Begin with TWO drugs if BP >20/10mmHg above goal and in moderate and high risk patients.

### 5.4 Types of Antihypertensive drugs

- A. **What are the main drugs that can be prescribed?** Four (4) drugs are recommended to CVD nurses for starting treatment in eligible patients in the ComHIP study. Physicians will have wider options to address complex patients' needs. The recommended drugs are;
  - I. Diuretic: Bendroflumethiazide. -initial dose, 2.5mg daily. Maximum dose of 5mg daily.
  - II. Beta-blocker: Atenolol-initial dose of 50mg daily. Maximum dose of 100mg daily provided the heart rate is greater than 60/min on the lower dose.
  - III. Calcium channel blocker: Nifedipine retarde or XL -initial dose 30mg daily. Maximum dose of 60 to 90 mg daily.
  - IV. ACE Inhibitor: Lisinopril-initial dose of 20mg daily. Maximum dose of 30mg daily.

### 5.5 Titration of antihypertensive medications (CVD Nurses): Low and Moderate risk patients

- ⊗ The following steps should guide CVD nurses in the dose titration of hypertensive medications;

#### A. Patients with a difference between enrollment and goal BP that is less than 20/10mmHg

- Start with only bendrofluomethiazide. (See Appendix 7.2)
  - Add atenolol or nifedipine or Lisinopril if BP is greater than goal of 140/90 after three months of bendrofluomethiazide.
  - Wait for three more months and if BP is still greater than 140/90, increase the dosage of the atenolol or nifedipine or Lisinopril.
  - Wait for another three months and refer patient to a physician if BP is still greater than 140/90
- ⊗ Key point: For clients with BP < 20/10 above goal, typically they will undergo 9 months of therapy after which failure to attain BP goal will call for referral to a physician at hospital. However, referral may be made anytime if any complication or serious adverse effects occur within this 9-month period. Patient monitoring should be done every 6 weeks irrespective of whether change in therapy or not.

#### B. Patients with a difference between enrollment and goal BP that is greater than 20/10

- Start with bendro AND atenolol or nifedipine or Lisinopril
  - After three months if BP is greater than 140/90, increase the dosage of the atenolol or nifedipine or Lisinopril.
  - If BP remains greater than 140/90 three months later, then refer to physician.
- ⊗ Key point: For clients with BP ≥ 20/10 above goal, typically they will undergo 6 months of therapy after which failure to attain BP goal will call for referral to a physician at hospital. However, referral may be made anytime if any complication or serious adverse effects occur within this 9-month period. Patient monitoring should be done every 6 weeks irrespective of whether change in therapy or not.

### 5.6 Titration of antihypertensive medications (Physicians): High risk patients

- ⊗ The following steps should guide physicians in the selection and dose titration of hypertensive medications.

#### A. What drugs are available to physicians? All the classes of antihypertensive below;

- a) Diuretic: bendroflumethiazide.-2.5mg daily
- b) Calcium Channel Blocker (CCB): Amlodipine 5-10mg or Nifedipine (SR) 20-60mg daily
- c) Beta Blocker: Atenolol 50-100mg daily
- d) Angiotensin Converting Enzyme (ACE) Inhibitor: Lisinopril 10-30mg daily
- e) ARB: Losartan 50-100mg daily

- ⊗ Additional options like centrally acting agents, alpha blockers, aldosterone antagonist may be available to physicians

#### B. What are the acceptable and possible combinations? The possible combinations are

a+b; a+c; a+d; a+e; b+d; b+c; b+e

- The choice may be influenced by the presence of the patient's other medical conditions
- Titrate dose or add additional drug to lower the BP to goal.

### C. Recommendations for compelling indications

There is evidence to support the use or avoidance of certain antihypertensive when other conditions are present. These include the following;

Table 5: Compelling indications for individual drug classes

| compelling indications      | initial therapy options        |
|-----------------------------|--------------------------------|
| Heart Failure               | THIAZ, BB, ACEI, ARB, ALDO ANT |
| Post Myocardial Infarction  | BB, ACEI, ALDO ANT             |
| High CVD risk               | THIAZ, BB, ACEI, CCB           |
| Diabetes                    | THIAZ, BB, ACEI, ARB, CCB      |
| Chronic Kidney Disease      | ACEI, ARB                      |
| Recurrent Stroke Prevention | THIAZ,ACEI                     |

Keys: THIAZ=thiazide diuretic, ACEI=angiotensin converting enzyme inhibitors, ARB=angiotensin receptor blocker, BB=Beta-blocker, CCB=calcium channel blocker, ALDO ANT=aldosterone antagonist

#### 5.7 General Prescribing Guideline

- A. Who should prescribe antihypertensive medicines?** CVD Nurse, Physician
- B.** Before prescribing medicines confirm that patient agrees to be on medications
- C. How should prescriptions be written?** Follow the steps below;
  - i. written legibly in ink or otherwise so as to be indelible
  - ii. written by the prescriber (CVD Nurse, Physician) and not left for someone to complete
  - iii. should be dated
  - iv. The full name and address of the patient should be stated
  - v. Dosage form, generic name of medication, strength, dose and dosage schedule
  - vi. Exact quantity of medication to be supplied
  - vii. the signature of the prescriber(CVD nurse, Physician) (which should be in ink)

#### 5.8 Side Effect Monitoring

- A. Who should monitor side effects in patients?** CVD nurse, LCS, Physician
- B. What are the possible side effects of various medicines?** See below;
  - i. ACE Inhibitors: swelling of lips, tongue and throat; the patient must be advised to seek immediate medical help. They can cause irritating dry cough.
  - ii. Beta blockers: worsening or precipitation of asthma; bradycardia; worsening of HF
  - iii. Calcium channel blockers: edema of the feet
  - iv. Diuretic: low potassium leading to generalized weakness.

#### 5.9 monitoring of response to treatment

- A. Who should monitor clients' response to treatment?** CVD nurse, Physician, LCS
- B. What should be the monitoring priorities?** see key focus below
  - i. Aim for goal BP reading
  - ii. Monitor for side effects
  - iii. Check for adherence to the non-drug measures for BP control
  - iv. For resistant hypertension consider evaluation for interfering substances
  - v. Also consider specialty consultation for patients with resistant hypertension.

### 5.10 General dispensing Guideline (For LCS only)

#### A. Who should dispense medication? LCS

#### B. What checks should be done before dispensing medicines? LCS should ensure that;

- i. the prescription is legally valid, genuine and has not been altered after issuing
- ii. Each medicine on the prescription contain the dosage form, generic name, strength, dose, dosage schedule and quantity of medication to be supplied
- iii. The prescription is assessed for validity, safety and clinical appropriateness.

#### C. How should medicines be labelled? Each dispensed medication should be appropriately packaged and adequately labelled with the following minimum information:

- i. Name of the patient and the generic name of the medicine
- ii. Strength of the active ingredient and special instructions
- iii. Quantity of dispensed product
- iv. Complete dose regimen in written and/or graphic form
- v. Duration of use
- vi. Name and address of the LCS facility and dispenser
- vii. Date of dispensing

- ☒ Dispenser should always ensure that patient fully understands how the medication should be taken before leaving premises.

### 5.11 Hypertensive Emergencies

- ☒ Severe hypertension, usually BP > 180/110 mmHg in adults may be associated with acute neurological, cardiovascular or renal compromise, and could be fatal.

- If an LCS or CHO records BP reading for a client in this range, arrangements must be made immediately to see a CVD nurse must immediately administer oral hydralazine 10mg and refer to a physician. Arrange with the physician for the patient's visit
- Physician to administer hydralazine IV 5-10 mg slowly over 20 minutes. This dose may be repeated after 20-30minutes, until the patient is conscious and can take oral medications.

### 5.12 Referral SOP for CVD nurse

#### A. Mild/Moderate risk Patients

- All confirmed hypertensive clients' 18-30years should be referred to a physician for further investigation.
- All clients with suspected secondary causes should be referred to a Physician
- All mild and moderate hypertensive clients with no change in BP levels within the first 90 days (resistant hypertension) of treatment should be referred to a physician.
- Clients who have developed intolerable side effects should be referred
- All clients who develop hypertension-related complication should be referred to a physician
- All clients who show signs of target organ damage while under treatment should be referred to a physician.
- Any client who experiences a cardiovascular event while under treatment should be referred to a physician

#### B. High risk Patients

- All severe/high risk patients should be referred to a physician
- All clients with history of unstable stroke or cardiovascular event should be referred to a physician

### 5.13 Proposed activities for patients' visit

The following is aimed at helping CVD nurses determine what needs to be done at a patients visit.

Table 6: Patient Visits and proposed activities

| Visit Number          | When                                                                                                                                                                                                                                                                                         | Activity                                                                                                                                                                                                                                                                                                                                                                                                                                  |
|-----------------------|----------------------------------------------------------------------------------------------------------------------------------------------------------------------------------------------------------------------------------------------------------------------------------------------|-------------------------------------------------------------------------------------------------------------------------------------------------------------------------------------------------------------------------------------------------------------------------------------------------------------------------------------------------------------------------------------------------------------------------------------------|
| 1                     | After patient has been screened and referred by LCS, CHO                                                                                                                                                                                                                                     | CVD Nurse to recheck BP                                                                                                                                                                                                                                                                                                                                                                                                                   |
| 2                     | Two weeks after visit 1                                                                                                                                                                                                                                                                      | <ol style="list-style-type: none"> <li>1. CVD Nurse to recheck BP and confirm diagnosis</li> <li>2. Enroll patient, perform risk assessment, perform anthropometric measurements</li> <li>3. Refer to <b>Referral SOP for CVD nurse</b> for all patients that should be referred to Physician.</li> <li>4. Initiate treatment</li> <li>5. Order laboratory investigation as needed</li> <li>6. Perform Hypertension counseling</li> </ol> |
| 3                     | 6 weeks after visit 2                                                                                                                                                                                                                                                                        | <ol style="list-style-type: none"> <li>1. Re-check BP</li> <li>2. Assess treatment, perform counseling</li> </ol>                                                                                                                                                                                                                                                                                                                         |
| 4                     | 6 weeks after visit 3                                                                                                                                                                                                                                                                        | <ol style="list-style-type: none"> <li>1. Review treatment plan until goal is reached</li> <li>2. Perform anthropometric measurements every 3 months after enrollment</li> </ol>                                                                                                                                                                                                                                                          |
| 5 & subsequent visits | <ul style="list-style-type: none"> <li>• Every 3 months for patients with Mild Hypertension (treated by CVD nurse)</li> <li>• Every 2 months for patient with Moderate Hypertension (treated by CVD nurse)</li> <li>• Monthly for Patients with High (treated by Physicians only)</li> </ul> | <ol style="list-style-type: none"> <li>1. Re-check BP, review treatment, assess for risk factors, perform Hypertension counseling</li> <li>2. Conduct follow up assessment every 6 months after enrollment</li> </ol>                                                                                                                                                                                                                     |

view only

## 6.0 SCREENING AND DIAGNOSIS ALGORITHM

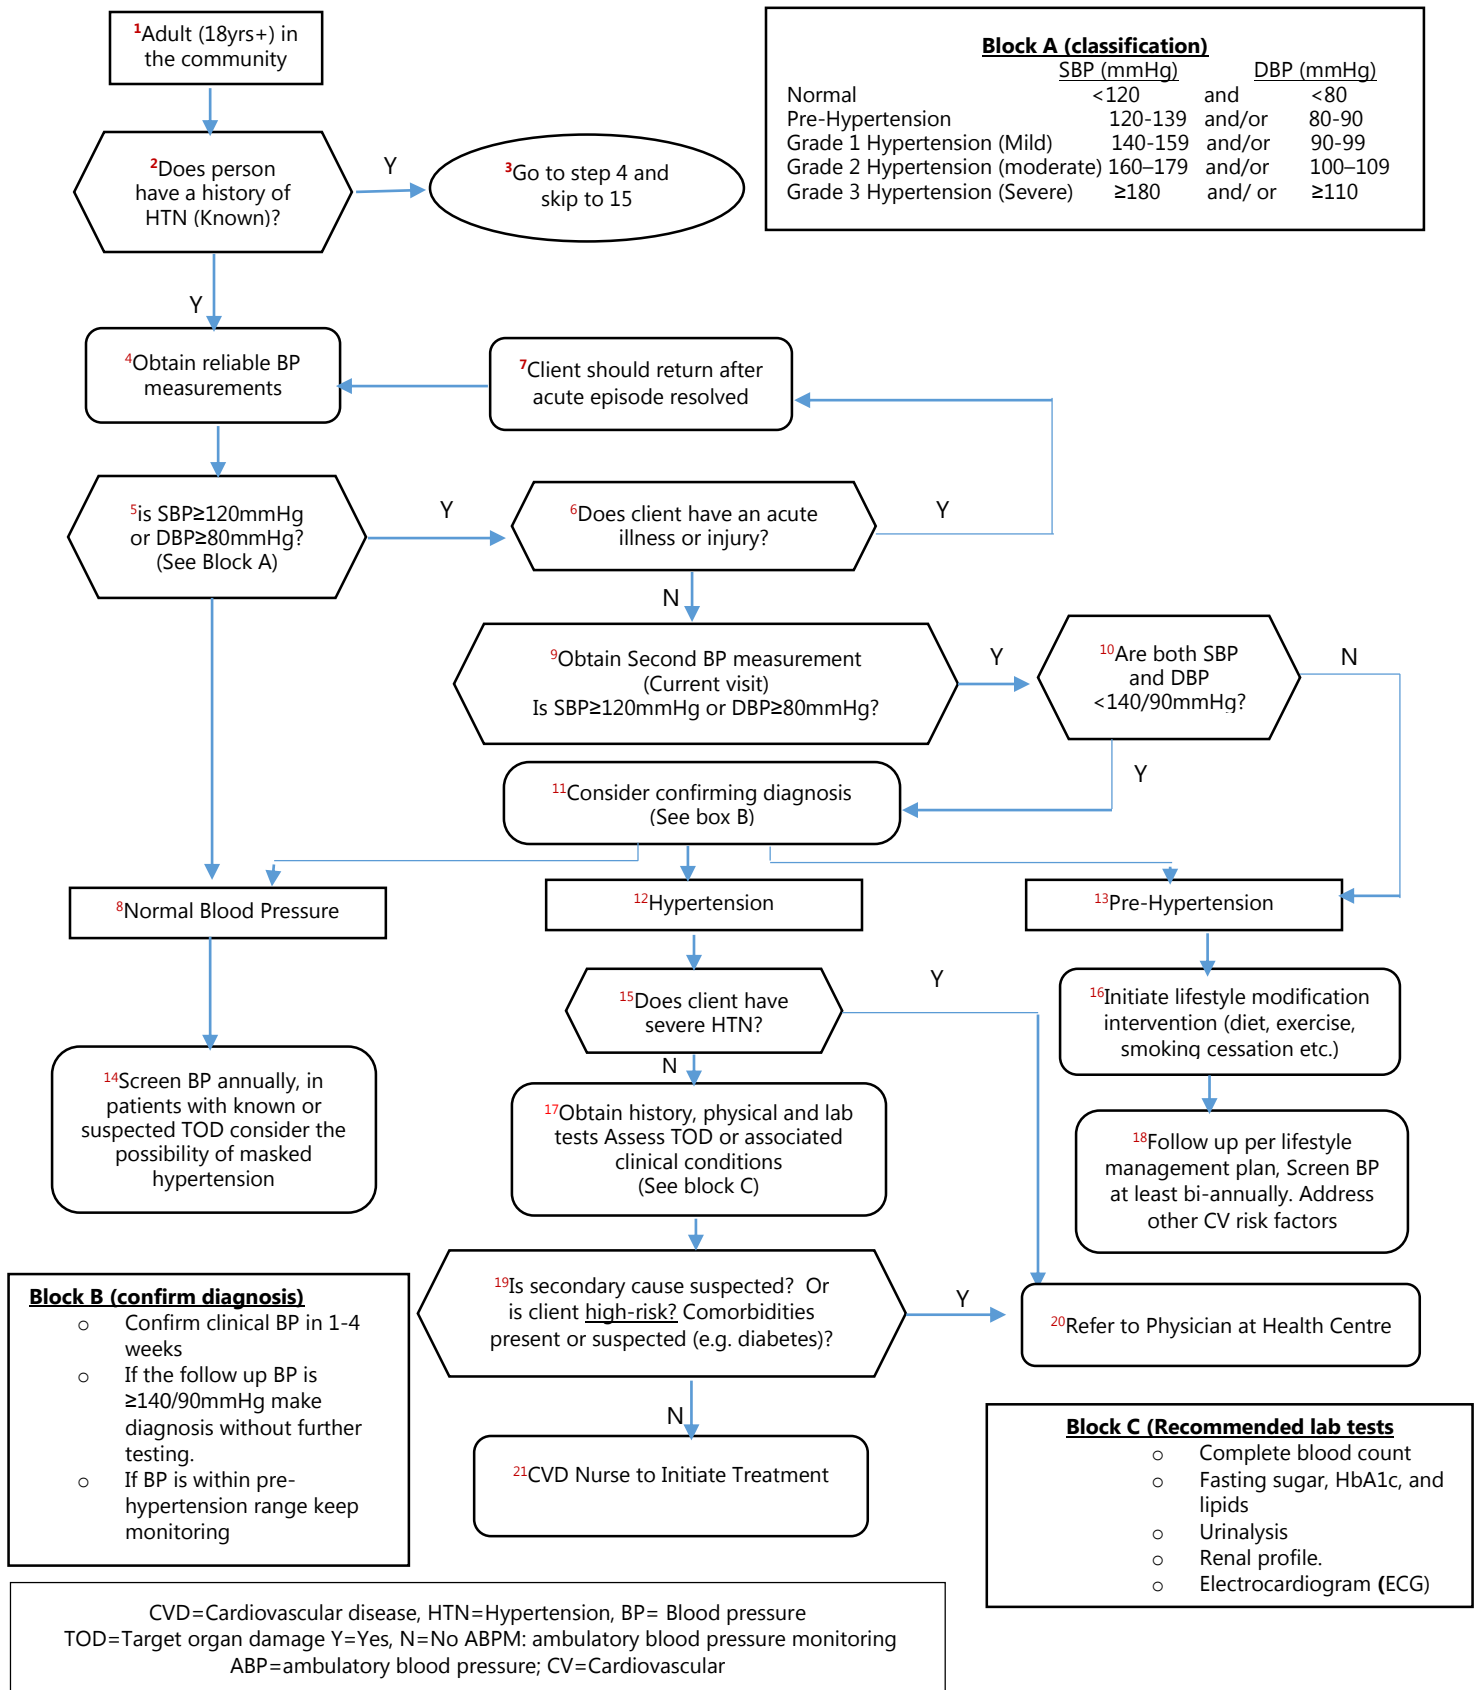

## 7.0 MANAGEMENT FLOW ALGORITHM

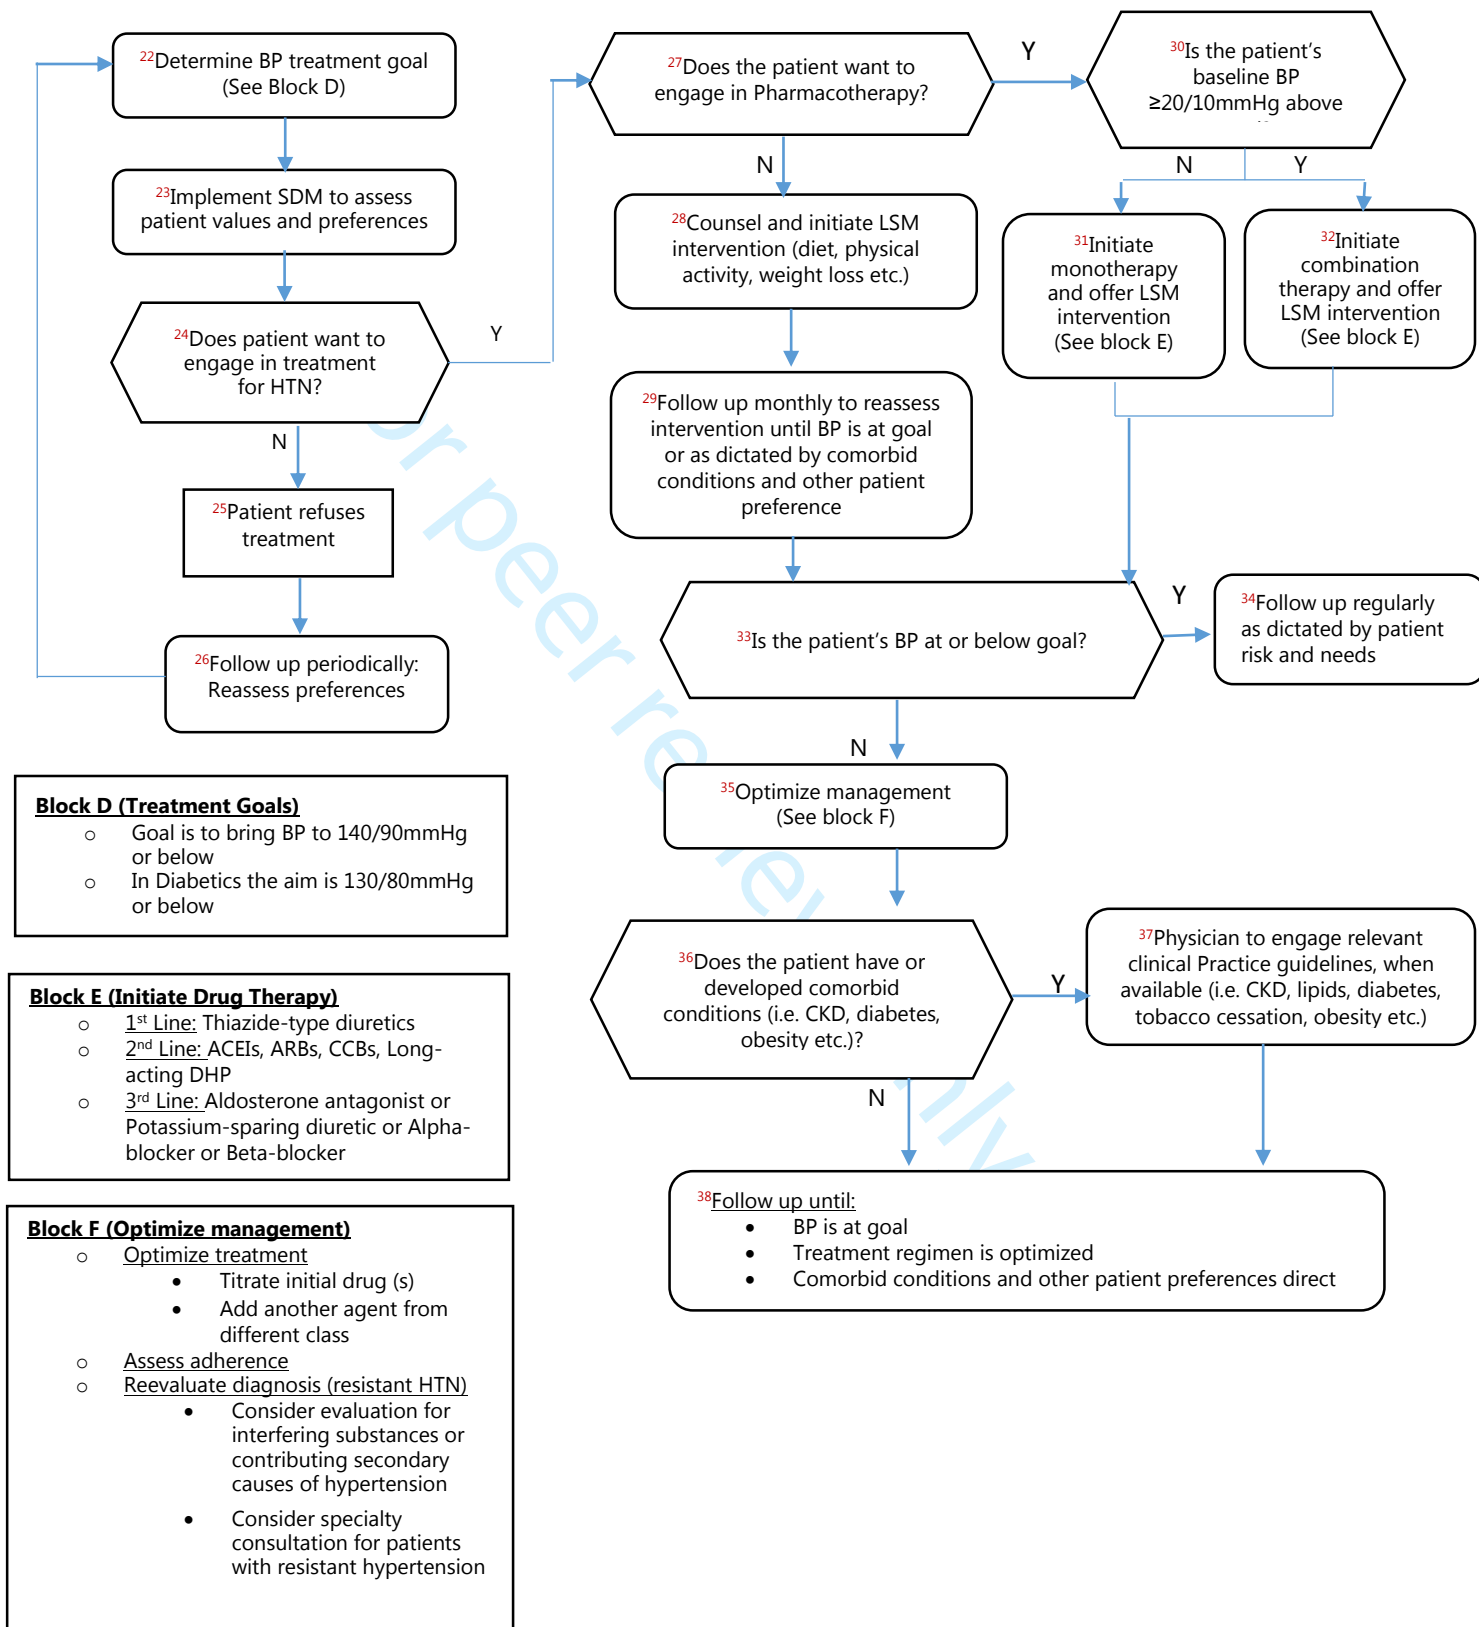



## 7.0 APPENDIX

### 7.1 Summary of GHS and NHIA approved drugs

| Class                    | Medicine                                       | Recommended in GHS treatment guideline | Available on NHIS Medicines List | Reimbursement NHIA cost (GHC) |
|--------------------------|------------------------------------------------|----------------------------------------|----------------------------------|-------------------------------|
| Diuretics                | Bendroflumethiazide 2.5mg                      | Yes                                    | Yes                              | 0.06/tab                      |
|                          | Bendroflumethiazide 5mg                        | No                                     | Yes                              | 0.06/tab                      |
|                          | Spironolactone 25mg                            | No                                     | Yes                              | 0.40/tab                      |
|                          | Spironolactone 50mg                            | No                                     | Yes                              | 0.70/tab                      |
| Beta-Blockers            | Atenolol 25mg                                  | Yes                                    | Yes                              | 0.10/tab                      |
|                          | Atenolol 50mg                                  | Yes                                    | Yes                              | 0.10/tab                      |
|                          | Atenolol 100mg                                 | Yes                                    | Yes                              | 0.13/tab                      |
|                          | Bisoprolol                                     | Yes                                    | No                               | n.a                           |
| ACE inhibitors           | Carvedilol                                     | Yes                                    | No                               | n.a                           |
|                          | Lisinopril 2.5mg                               | Yes                                    | Yes                              | 0.18/tab                      |
|                          | Lisinopril 5mg                                 | Yes                                    | Yes                              | 0.20/tab                      |
|                          | Lisinopril 10mg                                | Yes                                    | Yes                              | 0.25/tab                      |
|                          | Lisinopril 20mg                                | Yes                                    | Yes                              | 0.30/tab                      |
|                          | Ramipril 2.5mg<br>Ramipril 5mg                 | Yes<br>Yes                             | Yes<br>Yes                       | 0.22/tab<br>0.40/tab          |
| ARBs                     | Losartan 25mg                                  | Yes                                    | Yes                              | 0.36/tab                      |
|                          | Losartan 50mg                                  | Yes                                    | Yes                              | 0.50/tab                      |
|                          | Losartan 100mg                                 | Yes                                    | Yes                              | 1.0/tab                       |
|                          | Candesartan                                    | Yes                                    | No                               | n.a                           |
|                          | Valsartan                                      | Yes                                    | No                               | n.a                           |
| Calcium Channel Blockers | Nifedipine 10mg (capsule)                      | No                                     | Yes                              | 0.35/cap                      |
|                          | Nifedipine 10mg (SR)                           | Yes                                    | Yes                              | 0.21/tab                      |
|                          | Nifedipine 20mg (SR)                           | Yes                                    | Yes                              | 0.17/tab                      |
|                          | Nifedipine 30mg XL (GITS)                      | Yes                                    | Yes                              | 0.47/tab                      |
|                          | Amlodipine 5mg<br>Amlodipine 10mg              | Yes<br>Yes                             | Yes<br>Yes                       | 0.20/tab<br>0.30/tab          |
| Alpha Blockers           | Prazosin 500mcg                                | Yes                                    | Yes                              | 0.60/tab                      |
| Centrally acting agents  | Methyl dopa 250mg                              | Yes                                    | Yes                              | 0.25/tab                      |
| Vasodilators             | Hydralazine 25mg                               | Yes                                    | Yes                              | 0.70/tab                      |
| Combination therapies    | Atenolol + Hydrochlorothiazide (50+25mg)       | No                                     | Yes                              | 1.00/tab                      |
|                          | Atenolol + Hydrochlorothiazide (100mg +25mg)   | No                                     | Yes                              | 2.10/tab                      |
|                          | Lisinopril + Hydrochlorothiazide (10mg+12.5mg) | No                                     | Yes                              | 1.00/tab                      |
|                          | Lisinopril + Hydrochlorothiazide (20mg+12.5mg) | No                                     | Yes                              | 2.05/tab                      |
|                          |                                                |                                        |                                  |                               |

7.2 Drug Management Flow diagram for CVD nurses

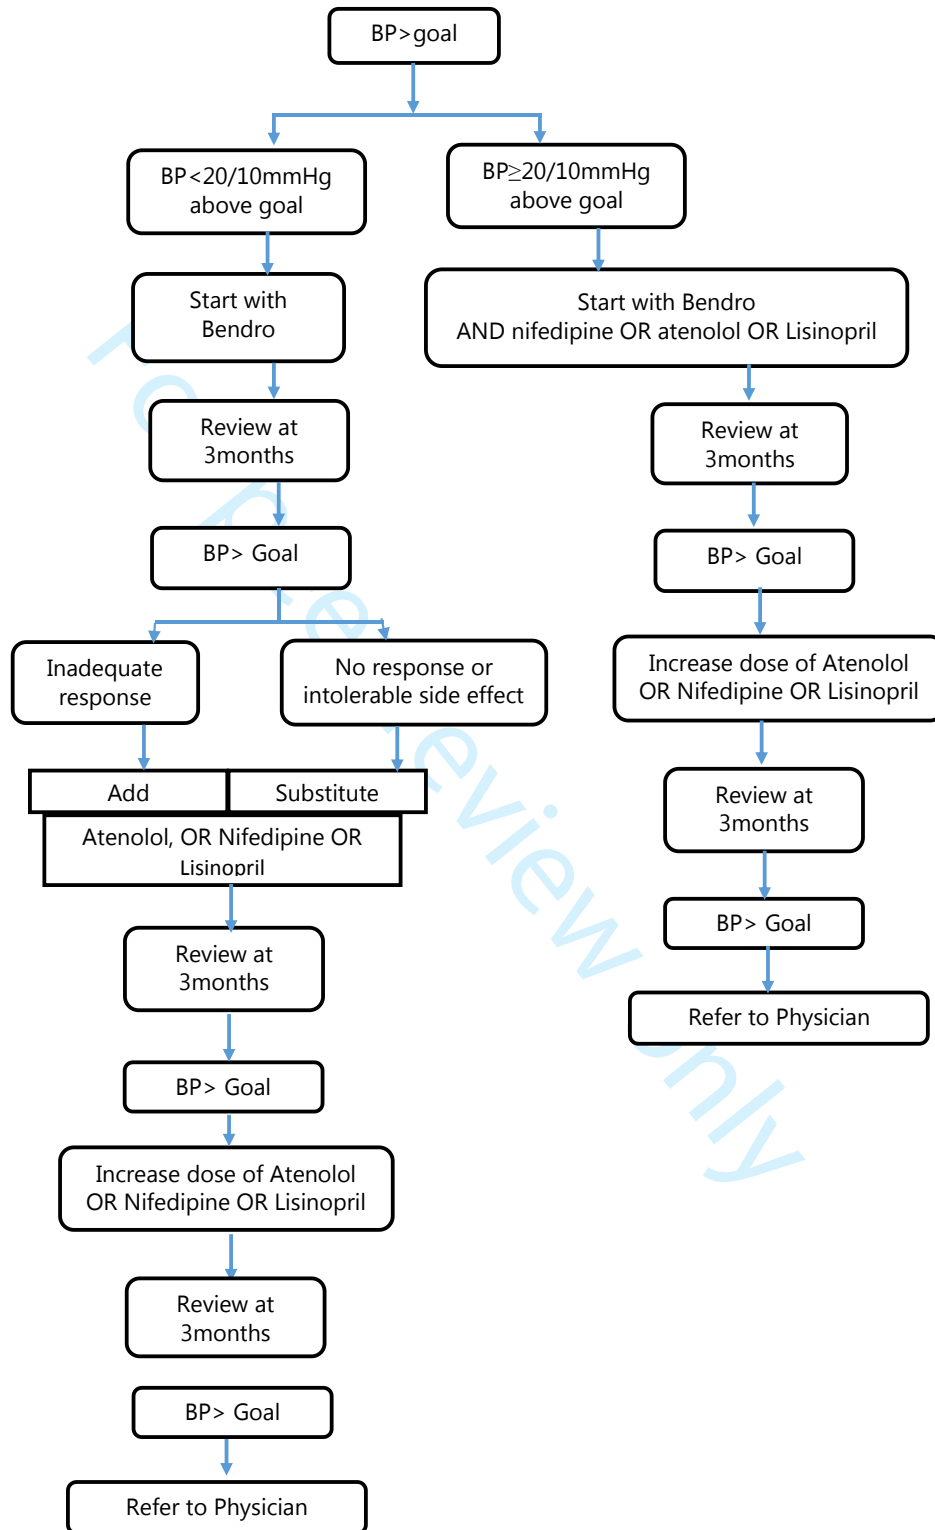

STROBE Statement—checklist of items that should be included in reports of observational studies

|                              | Item No. | Recommendation                                                                                                                                                                             | Page No. |
|------------------------------|----------|--------------------------------------------------------------------------------------------------------------------------------------------------------------------------------------------|----------|
| <b>Title and abstract</b>    | 1        | (a) Indicate the study’s design with a commonly used term in the title or the abstract                                                                                                     | 1        |
|                              |          | (b) Provide in the abstract an informative and balanced summary of what was done and what was found                                                                                        | 2        |
| <b>Introduction</b>          |          |                                                                                                                                                                                            |          |
| Background/rationale         | 2        | Explain the scientific background and rationale for the investigation being reported                                                                                                       | 3-4      |
| Objectives                   | 3        | State specific objectives, including any prespecified hypotheses                                                                                                                           | 4        |
| <b>Methods</b>               |          |                                                                                                                                                                                            |          |
| Study design                 | 4        | Present key elements of study design early in the paper                                                                                                                                    | 5        |
| Setting                      | 5        | Describe the setting, locations, and relevant dates, including periods of recruitment, exposure, follow-up, and data collection                                                            | 5        |
| Participants                 | 6        | (a) <i>Cohort study</i> —Give the eligibility criteria, and the sources and methods of selection of participants. Describe methods of follow-up                                            | 5-6      |
|                              |          | <i>Case-control study</i> —Give the eligibility criteria, and the sources and methods of case ascertainment and control selection. Give the rationale for the choice of cases and controls |          |
|                              |          | <i>Cross-sectional study</i> —Give the eligibility criteria, and the sources and methods of selection of participants                                                                      |          |
|                              |          | (b) <i>Cohort study</i> —For matched studies, give matching criteria and number of exposed and unexposed                                                                                   |          |
|                              |          | <i>Case-control study</i> —For matched studies, give matching criteria and the number of controls per case                                                                                 |          |
| Variables                    | 7        | Clearly define all outcomes, exposures, predictors, potential confounders, and effect modifiers. Give diagnostic criteria, if applicable                                                   | 6        |
| Data sources/<br>measurement | 8*       | For each variable of interest, give sources of data and details of methods of assessment (measurement). Describe comparability of assessment methods if there is more than one group       | 6        |
| Bias                         | 9        | Describe any efforts to address potential sources of bias                                                                                                                                  | 6-7      |
| Study size                   | 10       | Explain how the study size was arrived at                                                                                                                                                  | 6-7      |

Continued on next page

|                        |     |                                                                                                                                                                                                                    |       |
|------------------------|-----|--------------------------------------------------------------------------------------------------------------------------------------------------------------------------------------------------------------------|-------|
| Quantitative variables | 11  | Explain how quantitative variables were handled in the analyses. If applicable, describe which groupings were chosen and why                                                                                       | 7     |
| Statistical methods    | 12  | (a) Describe all statistical methods, including those used to control for confounding                                                                                                                              | 7     |
|                        |     | (b) Describe any methods used to examine subgroups and interactions                                                                                                                                                | 7     |
|                        |     | (c) Explain how missing data were addressed                                                                                                                                                                        | 7     |
|                        |     | (d) <i>Cohort study</i> —If applicable, explain how loss to follow-up was addressed                                                                                                                                | 7     |
|                        |     | <i>Case-control study</i> —If applicable, explain how matching of cases and controls was addressed<br><i>Cross-sectional study</i> —If applicable, describe analytical methods taking account of sampling strategy |       |
|                        |     | (e) Describe any sensitivity analyses                                                                                                                                                                              |       |
| <b>Results</b>         |     |                                                                                                                                                                                                                    |       |
| Participants           | 13* | (a) Report numbers of individuals at each stage of study—eg numbers potentially eligible, examined for eligibility, confirmed eligible, included in the study, completing follow-up, and analysed                  | 7-8   |
|                        |     | (b) Give reasons for non-participation at each stage                                                                                                                                                               | 7-8   |
|                        |     | (c) Consider use of a flow diagram                                                                                                                                                                                 |       |
| Descriptive data       | 14* | (a) Give characteristics of study participants (eg demographic, clinical, social) and information on exposures and potential confounders                                                                           | 7-9   |
|                        |     | (b) Indicate number of participants with missing data for each variable of interest                                                                                                                                | 7-9   |
|                        |     | (c) <i>Cohort study</i> —Summarise follow-up time (eg, average and total amount)                                                                                                                                   | 7-9   |
| Outcome data           | 15* | <i>Cohort study</i> —Report numbers of outcome events or summary measures over time                                                                                                                                | 10-13 |
|                        |     | <i>Case-control study</i> —Report numbers in each exposure category, or summary measures of exposure                                                                                                               |       |
|                        |     | <i>Cross-sectional study</i> —Report numbers of outcome events or summary measures                                                                                                                                 |       |
| Main results           | 16  | (a) Give unadjusted estimates and, if applicable, confounder-adjusted estimates and their precision (eg, 95% confidence interval). Make clear which confounders were adjusted for and why they were included       | 8-14  |
|                        |     | (b) Report category boundaries when continuous variables were categorized                                                                                                                                          |       |
|                        |     | (c) If relevant, consider translating estimates of relative risk into absolute risk for a meaningful time period                                                                                                   |       |

Continued on next page

|                          |    |                                                                                                                                                                            |       |
|--------------------------|----|----------------------------------------------------------------------------------------------------------------------------------------------------------------------------|-------|
| Other analyses           | 17 | Report other analyses done—eg analyses of subgroups and interactions, and sensitivity analyses                                                                             | 10-14 |
| <b>Discussion</b>        |    |                                                                                                                                                                            |       |
| Key results              | 18 | Summarise key results with reference to study objectives                                                                                                                   | 14    |
| Limitations              | 19 | Discuss limitations of the study, taking into account sources of potential bias or imprecision. Discuss both direction and magnitude of any potential bias                 | 15    |
| Interpretation           | 20 | Give a cautious overall interpretation of results considering objectives, limitations, multiplicity of analyses, results from similar studies, and other relevant evidence | 16    |
| Generalisability         | 21 | Discuss the generalisability (external validity) of the study results                                                                                                      | 15    |
| <b>Other information</b> |    |                                                                                                                                                                            |       |
| Funding                  | 22 | Give the source of funding and the role of the funders for the present study and, if applicable, for the original study on which the present article is based              | 17    |

\*Give information separately for cases and controls in case-control studies and, if applicable, for exposed and unexposed groups in cohort and cross-sectional studies.

**Note:** An Explanation and Elaboration article discusses each checklist item and gives methodological background and published examples of transparent reporting. The STROBE checklist is best used in conjunction with this article (freely available on the Web sites of PLoS Medicine at <http://www.plosmedicine.org/>, Annals of Internal Medicine at <http://www.annals.org/>, and Epidemiology at <http://www.epidem.com/>). Information on the STROBE Initiative is available at [www.strobe-statement.org](http://www.strobe-statement.org).

1  
2  
3  
4  
5  
6  
7  
8  
9  
10  
11  
12  
13  
14  
15  
16  
17  
18  
19  
20  
21  
22  
23  
24  
25  
26  
27  
28  
29  
30  
31  
32  
33  
34  
35  
36  
37  
38  
39  
40  
41  
42  
43  
44  
45  
46  
47

# BMJ Open

## Can a nurse-led community based model of hypertension care improve hypertension control in Ghana? Results from the ComHIP cohort study.

|                                 |                                                                                                                                                                                                                                                                                                                                                                                                                                                                                                                                                                                                                                                                                                                                                                                |
|---------------------------------|--------------------------------------------------------------------------------------------------------------------------------------------------------------------------------------------------------------------------------------------------------------------------------------------------------------------------------------------------------------------------------------------------------------------------------------------------------------------------------------------------------------------------------------------------------------------------------------------------------------------------------------------------------------------------------------------------------------------------------------------------------------------------------|
| Journal:                        | <i>BMJ Open</i>                                                                                                                                                                                                                                                                                                                                                                                                                                                                                                                                                                                                                                                                                                                                                                |
| Manuscript ID                   | bmjopen-2018-026799.R2                                                                                                                                                                                                                                                                                                                                                                                                                                                                                                                                                                                                                                                                                                                                                         |
| Article Type:                   | Research                                                                                                                                                                                                                                                                                                                                                                                                                                                                                                                                                                                                                                                                                                                                                                       |
| Date Submitted by the Author:   | 06-Feb-2019                                                                                                                                                                                                                                                                                                                                                                                                                                                                                                                                                                                                                                                                                                                                                                    |
| Complete List of Authors:       | Adler, Alma; London School of Hygiene & Tropical Medicine, Department of Non-communicable Disease Epidemiology; Harvard Medical School<br>Laar, Amos; School of Public Health, University of Ghana, Department of Population, Family & Reproductive Health<br>Prieto-Merino, David; London School of Hygiene and Tropical Medicine, Department of Non-communicable Disease Epidemiology<br>Der, Reina; Family Health International<br>Mangortey, Debbie ; Family Health International<br>Dirks, Rebecca; Family Health International<br>Lamptey, Peter; London School of Hygiene & Tropical Medicine, Department of Non-communicable Disease Epidemiology<br>Perel, Pablo; London School of Hygiene and Tropical Medicine, Department of Non-Communicable Disease Epidemiology |
| <b>Primary Subject Heading</b>: | Global health                                                                                                                                                                                                                                                                                                                                                                                                                                                                                                                                                                                                                                                                                                                                                                  |
| Secondary Subject Heading:      | Epidemiology, Public health                                                                                                                                                                                                                                                                                                                                                                                                                                                                                                                                                                                                                                                                                                                                                    |
| Keywords:                       | Hypertension < CARDIOLOGY, cohort, EPIDEMIOLOGY                                                                                                                                                                                                                                                                                                                                                                                                                                                                                                                                                                                                                                                                                                                                |
|                                 |                                                                                                                                                                                                                                                                                                                                                                                                                                                                                                                                                                                                                                                                                                                                                                                |

SCHOLARONE™  
Manuscripts

1  
2  
3 **Can a nurse-led community based model of hypertension care improve hypertension control in**  
4 **Ghana? Results from the ComHIP cohort study.**  
5  
6  
7

8 **Alma J Adler<sup>12\*</sup>, Amos K Laar<sup>3\*</sup>, David Prieto-Merino<sup>1</sup>, Reina M. M. Der<sup>4</sup>, Debbie Mangortey<sup>4</sup>,**  
9 **Rebecca Dirks<sup>5</sup>, Peter Lamptey<sup>1</sup>, Pablo Perel<sup>1</sup>**  
10

11 **\*Co-first authors**  
12  
13

14  
15 **Correspondence:**

16 **Dr. Alma J Adler**

17 [alma.adler@lshtm.ac.uk](mailto:alma.adler@lshtm.ac.uk)  
18

19 <sup>1</sup>Department of Non-communicable Disease Epidemiology. London School of Hygiene &  
20 Tropical Medicine. Keppel St, London. WC1E 7HT  
21

22 <sup>2</sup>Department of Global Health and Social Medicine, Harvard Medical School. Boston, MA,  
23 United States  
24

25  
26 <sup>3</sup> Department of Population, Family, & Reproductive Health, School of Public Health,  
27 University of Ghana, LG 13, Legon, Accra, Ghana.  
28

29  
30 <sup>4</sup>FHI 360, Accra, Ghana  
31

32 <sup>5</sup>FHI360, Washington DC, United States.  
33  
34

35  
36 Alma J Adler [alma.adler@lshtm.ac.uk](mailto:alma.adler@lshtm.ac.uk)

37 Amos K Laar [alaar@ug.edu.gh](mailto:alaar@ug.edu.gh)

38 David Prieto -Merino [david.prieto@lshtm.ac.uk](mailto:david.prieto@lshtm.ac.uk)

39 Reina M. M. Der [RDer@fhi360.org](mailto:RDer@fhi360.org)

40 Debbie Mangortey [DMangortey@fhi360.org](mailto:DMangortey@fhi360.org)

41 Rebecca Dirks [rdirks@fhi360.org](mailto:rdirks@fhi360.org)

42 Peter Lamptey [plamptey@fhi360.org](mailto:plamptey@fhi360.org)

43 Pablo Perel [pablo.perel@lshtm.ac.uk](mailto:pablo.perel@lshtm.ac.uk)  
44  
45

46  
47 **Word count: 4435**  
48  
49  
50  
51  
52  
53  
54  
55  
56  
57  
58  
59  
60

**Abstract:**

**Objectives:** to evaluate the effectiveness of the Community-Based Hypertension Improvement Project (ComHIP) in increasing hypertension control.

**Setting:** Lower Manya Krobo, Eastern Region, Ghana.

**Participants:** All adult hypertensive community members, except pregnant women, were eligible for inclusion in the study. We enrolled 1339 participants, 69% of which were female. 552 had a six-month visit, and 338 had a 12-month visit.

**Interventions:** We report on a package of interventions where community based CVD nurses were trained by Family Health International (FHI360). CVD nurses confirmed diagnoses of known hypertensives and newly screened individuals. Participants were treated according to clinical guidelines established through the project's Technical Steering Committee. Patients received three types of reminder and adherence messages. We used CommCare, a cloud based system, as a case management and referral tool.

**Primary outcome:** Hypertension control defined as blood pressure under 140/90 mm Hg. Secondary outcomes: Changes in blood pressure and knowledge of risk factors for hypertension.

**Results:** After one year of intervention 72% (95% CI 67%, 77%) of participants had their hypertension under control. Systolic BP was reduced by -12.2 mmHg (95%CI 14.4, -10.1) and diastolic BP by -7.5 mmHg (95%CI 9.9, 6.1). Due to low retention, we were unable to look at knowledge of risk factors. Factors associated with remaining in the programme for 12-months included education, older age, hypertension under control at enrollment, and enrollment date. The majority of patients who remained in the programme were on treatment, with two-thirds taking at least two medications.

**Conclusions:** Patients retained in ComHIP had increased BP control. However, high loss to follow-up limits potential public health impact of these types of programmes. To minimize impact of externalities, programmes should include standard procedures and back-up systems to maximize the possibility that patients stay in the programme.

**Keywords:**

Hypertension, Ghana, Community based cohort study.

**STRENGTHS AND LIMITATIONS OF THIS STUDY**

- ComHIP is a large cohort study testing a community based model of hypertension care
- Trained community based cardiovascular nurses conducted screening, diagnosis and management of hypertension patients
- Patients were sent three types of SMS, daily reminders to take their medications, appointment reminders, and weekly health education messages
- Protocol stated that blood pressure would be checked with a minimum of three serial readings at regular intervals, but at a minimum of 6-monthly intervals



- a limitation of the study was that it did not include a control group

## INTRODUCTION:

Globally, raised systolic blood pressure (SBP) is one of the greatest risk factors for disability [1]. Hypertension is generally considered to be the level of raised blood pressure (BP) where medications show a reduction in clinical events in randomized trials. This is generally accepted as  $\geq 140$  SBP mmHg or  $\geq 90$  diastolic mmHg (DBP)[2].

Evidence shows that lowering hypertensive individual's blood pressure with anti-hypertensive drugs reduces the risk of further cardiovascular events; with a reduction in stroke by an estimated 35–40% and a myocardial infarction and heart failure reduced by 20–25% reduction [3-5]. Whilst average age-standardised BP is decreasing in most high-income countries, it is increasing in most low and middle income countries (LMICs) [6] with 32% to 50% of adults estimated to be hypertensive in sub-Saharan Africa [7].

The Prospective Urban Rural Epidemiology (PURE) study showed that despite high levels of hypertension worldwide, only 34% of Africans are aware of their hypertension status, only 31.3% receive any treatment and only 6.5% have their blood pressure under control [8]. Our recent study of hypertension prevalence in the Lower Manya Krobo, Ghana, showed that only 2.1% of hypertensives had their blood pressure under control [9].

Because of the great burden of hypertension in Sub-Saharan Africa and the poor rate of hypertension control, innovative methods for hypertension management are needed. Launched in 2015, the Community-Based Hypertension Improvement Project (ComHIP) introduced an innovative model for hypertension control at the community level. ComHIP is a public-private partnership between the Ghana Health Service, FHI 360 and the Novartis Foundation.

The aim of ComHIP is to improve hypertension management and control in the Lower Manya Krobo district in the Eastern Region of Ghana. The programme includes a package of interventions composed of six components (Supplementary Figure 1), aimed at increasing access to hypertension services at the community level. Screening in the community is provided by Cardiovascular Disease (CVD) nurses and Community Health Officers (CHOs), as well as through local private sector drug shops called licensed chemical sellers (LCS). Ongoing hypertension management is provided by CVD nurses or, for those with co-morbidities or severe conditions, at district hospitals. Patients are encouraged to routinely monitor their blood pressure by having their BP measured at a LCS. The various service providers are linked through a cloud-based system which revolve around bringing hypertension care into the community. Physicians, Community based CVD nurses, CHOs, and LCS staff were trained by FHI 360 to provide specific services.

For instance, CVD nurses conduct hypertension screening, and confirmation of hypertension diagnosis, staging of degree of hypertension, assessment of other CVD risk factors, counselling, monitoring and follow up and trained LCS conduct community BP screening and awareness raising. Further information is found in the supplementary material.

The ComHIP Programme is being independently evaluated by the University of Ghana School of Public Health and the London School of Hygiene & Tropical Medicine with a mixed method approach through a series of quantitative and qualitative studies. These studies include repeat cross-sectional surveys within the intervention and comparison districts to track overall awareness and prevalence of hypertension; a cohort of hypertensive persons included in ComHIP to assess hypertension control; a

1  
2  
3 cost-effectiveness evaluation; a study to assess the level of patient-centeredness within the  
4 programme; and a qualitative assessment of ComHIP stakeholders. In this paper we report the results  
5 of the cohort study.  
6  
7  
8

## 9 **Objectives**

10  
11 The objective of this study was to evaluate the effectiveness of ComHIP for controlling hypertension  
12 in patients with hypertension enrolled into the ComHIP programme.  
13  
14

## 15 **METHODS:**

### 16 **Study design**

17  
18 The study was a prospective cohort study which included all patients recruited into the ComHIP  
19 Programme.  
20  
21

### 22 **Setting**

23  
24 The study was conducted in Lower Manya Krobo, a municipality in the Eastern region of Ghana. This  
25 is a peri-urban setting approximately two hours from the national capital, Accra with a population of  
26 approximately 89,246, of whom 84% live in urban areas.[10] Recruitment began October 2015 and  
27 ended in December 2016.  
28  
29

### 30 **Training**

31  
32 FHI360 and the MoH conducted training. Training duration ranged from three days for LCS, and  
33 physicians to 6 days for CVD nurses. Aside from the general training package (BP screening including  
34 the recommended standard operating procedures for BP checking, Lifestyle modification counselling,  
35 interviewing/counselling techniques, treatment adherence counselling) offered to all personnel, CVD  
36 nurses and physicians received additional training on hypertension diagnosis, assessing the risk of  
37 patients. Assessing for TODs, drugs for the management of hypertension and their side effects and  
38 contraindications.  
39  
40

41  
42 Participants were issued certificate of participation signed by the cardiologist specialist who  
43 conducted the training and the director general of the GHS. Also, as is done by the GHS the continuous  
44 learning log books of the GHS personnel were endorsed by the project to document the training  
45 received.  
46  
47  
48  
49

### 50 **Participants**

51  
52 Patients were enrolled into the programme if 1) they were known hypertensives or 2) had an elevated  
53 blood pressure reading at any ComHIP screening. Any individual living in Lower Manya Krobo 18 years  
54 or older was eligible, except pregnant women. Patients had to have access to a mobile phone to be  
55 enrolled in the programme. However, in order to negate loss of patients, patients without phones  
56 were not necessarily excluded based on this, rather, they were encouraged to provide phone numbers  
57 of a willing third party who lived nearby.  
58  
59  
60

## Intervention

Community members were screened by CHOs, LCS, or CVD nurses, using Omron M6 BP monitors that came with a cuff size of 42 cm which is about the 2nd largest cuff size in the market for those machines. Though the project requested for nurses to report cases of patient with bigger upper arms that required bigger cuff sizes, throughout the implementation, no such reports was received. The average of three serial readings was used to confirm hypertension diagnosis. Patients who were at risk of hypertension (SBP  $\geq 120$ , but  $< 140$ ) were given health education. All patients with SBP  $\geq 140$  or DBP  $\geq 90$  were referred to a CVD nurse for diagnosis. Patients with SBP  $\geq 180$  or DBP  $\geq 110$  were enrolled and referred to the physician for urgent care. Patients that were considered to have severe hypertension, (SBP  $\geq 180$  or DBP  $\geq 110$  or SBP between 160 – 179 or DBP 100 – 109 with one or more risk factors, or any evidence of organ damage see Appendix A) were referred for management by a physician at one of the district hospitals, until their blood pressure was stable, and then they were returned to CVD nurses for care. All other patients were managed by CVD nurses.

Patients with hypertension were enrolled and followed for at least one year. All patient interactions (with LCS, CHOs, CVD nurses, community and hospital pharmacist and doctors) were recorded and uploaded through the CommCare platform. Patients were requested to present for appointments at the following intervals; monthly BP monitoring appointments, monthly, bi-monthly or quarterly review visits (depending on risk factors and personal factors); and six-monthly follow up assessments. Participants were recruited from October 2015 until December 2016, and followed through December 2017. Guidelines for patient visits can be found in the supplementary materials (Supplementary Table 1 and Supplementary Figure 2, Appendix A).

All enrolled participants were treated based on the same clinical guidelines established through the project's Technical Steering Committee, which included senior members of the GHS. The treatment goal was to improve blood pressure of all patients to below 140/90 mmHg. Participants were initiated onto drug therapy and supplemented with non-drug therapy (lifestyle modification including low salt diets, increased fruit and vegetable diet, reduction in alcohol consumption, smoking cessation and regular aerobic exercise) irrespective of their risk level. The decision to initiate a monotherapy or multiple drug therapy depended largely on the level at which the participants BP was above goal and the overall risk level of patients. Recommended drugs and dosages are found in supplementary Table 2. Patient's response to antihypertensive were reviewed every three months if possible and modified based on recommended guidelines if required. In Ghana, there is a system of National Health Insurance, and every Ghanaian is required to enrol in. The Scheme provides select medications at no cost for anyone who has a valid National Health Insurance card. Although the NHIS does not attempt to treat all diseases suffered by insured members, over 95% of disease conditions that afflict us are covered by the NHIS. Services can be accessed at accredited health facilities.

CommCare is a vital component of ComHIP. It serves as a case management system, referral tool, and job aid for providers. The CommCare database is linked with a SMS platform to automatically send daily adherence reminders, weekly healthy living tips, and consultation and prescription refill reminders to enrolled patients. These messages are sent via text or voice SMS with four language choices. The programme is described in more detail elsewhere [9]. Briefly, through CommCare patients diagnosed with severe hypertension or co-existing conditions are automatically referred to a physician. All patients enrolled in ComHIP receive SMS daily for medication reminders, weekly for

1  
2  
3 health education, and upon need for appointment and screening reminders. CommCare also provides  
4 a cloud based health records system that links patients' records with the SMS system. The SMS  
5 component of the project was implemented by a third party Viamo, to facilitate the link between the  
6 two systems a bridge was built to automatically relay relevant information from the projects cloud-  
7 based health records to the Viamo messaging platform. To ensure confidentiality, only information  
8 relevant to schedule appoints is relayed to the Viamo platform (i.e. patient code, date of visit, type of  
9 visit, next review or refill appoint, patient's phone number, preferred, language, time of receipt of  
10 message and format of message, referral details and BP). When a visit is missed, the system,  
11 automatically relays back to the CVD nurse who enrolled the Patient or is managing the Patient via  
12 text message for the nurse to trace the patient. Due to operational problems, there was a break in  
13 service in CommCare that began on 12 May 2016 for a period of at least three months.  
14  
15  
16

## 17 **Variables**

18  
19 Main outcomes:

20  
21 The main outcomes of interest were hypertension control (<140/90 mmHg), and changes in systolic  
22 and diastolic blood pressure. Because of the low follow up rate, we also used appointment around six  
23 months, and appointment around 12 months as outcomes of interest.  
24

25  
26 Other variables:

27  
28 Other variables included knowledge of risk factors for hypertension, demographic factors including  
29 age, gender and marital status; risk factors such as body-mass index (BMI), awareness of hypertension  
30 (defined as having knowledge of a previous diagnosis of hypertension), having hypertension under  
31 control prior to enrolment, and having previous diagnoses of other heart diseases, and socioeconomic  
32 factors. A full list of variables is found in Table 1.  
33

## 34 **Data collection**

35  
36 Data were collected on blood pressure using standardised protocols. At six and 12 months forms were  
37 administered by health care providers to collect information on patient knowledge of risk factors for  
38 hypertension and health behaviours.  
39

40  
41 All data were collected and downloaded from the CommCare platform. Initially data was intended to  
42 be analysed from the patient knowledge/behaviour forms used at six-month and 12-month follow up  
43 appointments. Due to poor levels of follow up, any appointment between five and seven months after  
44 enrolment was used for the six-month appointment analysis, and any appointment between 11 and  
45 13 months after enrolment was used for the 12-month appointment analysis.  
46  
47  
48

## 49 **Sample size**

50  
51 This cohort study included all the patients recruited in the ComHIP programme and a specific sample  
52 size was not calculated. However, in the protocol we assumed that the total district population is  
53 about 90,000; about 30,000, of whom are adults, and about 36% [12000] are estimated to be  
54 hypertensive. Assuming that about 10% of the adults with hypertension in the district will be included  
55 in the ComHIP Programme we would have a cohort of 1,200 patients with hypertension.  
56

57  
58 We estimated that a cohort study of 1200 patients with hypertension would provide a power greater  
59 than 90% (with an alpha error of 0.05) to detect a two-fold increase of control of hypertension (from  
60 4% to 8%).

## Patient and Public Involvement

Community members, including community leaders, were first involved through a stakeholder workshop. In this workshop, community members shared their thoughts, knowledge, and concerns about health in general, NCD-related conditions, and access to healthcare. Furthermore, community members were made aware of the hypertension project planned to be initiated in their community. This information was considered in finalizing the design of the service delivery model and the development of prevention, education, and behaviour change messages.

Patients were recruited into the project through free screening offered at 1) local drug shops, names Licensed Chemical Sellers; 2) Community Health Planning Service (CHPS) sites; or 3) Community pharmacies. There were community screening activities and radio programs through which community members were educated on the project and hypertension in general. In addition, ComHIP staff conducted annual stakeholder meetings to provide updates to community members on the project progress.

## Statistical methods

We recoded exposures to reduce the number of levels and of missing values: For all the previous diagnosis / awareness: We have coded "missing" or "not known" or "no answer" as 0, so that value 1 always means "Patient knows of a previous diagnosis" while value 0 means anything else (patient does not know or answer is missing). Because there were few previous diagnoses of each specific event (MI, stroke, diabetes...) we created a variable with value 1 if any diagnosis was present and 0 if none was present.

For education, we assumed that those that did not know (48) or did not respond (26) did not have previous formal education (the largest group). We then grouped education in 4 levels: 1) no formal education, 2) primary (completed or not) 3) secondary (completed or not) and 4) higher (university)

For marital status, we made 4 categories: 1) Never married 2) married or cohabiting 3) separated or divorced 4) widowed.

We described the distribution of each variable at baseline, six-months and 12-months follow up, although comparisons cannot be done directly due to the large number of individuals that did not have follow up. To study what variables might affect the patient staying for 12-months in the programme we ran a logistics regression for the binary outcome variable: "patient had 12-month visit (Y/N)". To consider the loss to follow up (patterns of visits), we separated the individuals into four different groups: (A) those individuals that did not come to any follow up visit, (B) those that came only to the 6-month visit, (C) those that came only to the 12-month visit, and (D) those that came to both follow up visits.

We described the absolute values of blood pressure (SBP and DBP), the proportion of patients with blood pressure under control and the distribution of hypertension stages for each of these groups in each of the visits. We estimated the average changes of blood pressure for each group at each follow up visit and we compared the changes between groups with Student's t-tests. We compared the mean of SBP and DBP between the groups with ANOVA models. To compare the proportion of patients with HT control or the distribution of hypertension stages between groups we used chi-square tests. To test the changes of variables within groups we used paired t-tests for continuous variables and marginal homogeneity tests for categorical variables.

## Ethical Approval

Ethical approval was granted by the Institutional Review Boards (IRBs) of LSHTM (LSHTM Ethics Ref: 10,152), the Ghana Health Service (ID NO. GHS-ERC 04/01/15), and the University of Ghana at Noguchi Memorial Institute for Medical Research (Ethics clearance # IRB00001276). Written informed consent was obtained from all participants.

## RESULTS:

### Participants:

A total of 18,339 individuals 18 years and over were screened, 4118 referred to CVD nurses to confirm diagnosis, and of those 1339 were enrolled (76 (5.7%) low risk Grade 1 BP which is SBP 140 – 159 or DBP 90 – 99 without any target organ damages (TODs), co-morbidities or  $\geq 2$  risk factors), 559 (41.7%) (Moderate risk (SBP 160-179 or DBP 100 – 109 without any TODs, co-morbidities or  $\geq 2$  risk factors or Grade 1 BP with TODs, co-morbidities or  $\geq 2$  risk factors), and 704 (52.6%) High risk (Grade 3 which is SBP  $\geq 180$  or DBP  $\geq 101$  without any TODs, co-morbidities or  $\geq 2$  risk factors or Grade 2 BP with TODs, co-morbidities or  $\geq 2$  risk factors).

### General characteristics of the cohort

The average age of the cohort was 58 years. Everyone was enrolled into the cohort by CVD nurses. Of the 1,339 people enrolled in the cohort, 24% were referred to ComHIP by LCS, 45% were referred by CHO, 23% were referred by CVD nurses, 3% were through physicians, and 5% were referred through other channels. 69% of the cohort was female, 31% male. Other characteristics of people enrolled in the cohort are found in Table 1.

Table 1. Characteristics of participants in the study at baseline.

| Characteristic            | % all | % 6 months | %12 months |
|---------------------------|-------|------------|------------|
| <b>Number</b>             | 1339  | 552        | 338        |
| <b>Referred by</b>        |       |            |            |
| LCS                       | 23.9  | 23.4       | 24.3       |
| CHO                       | 45.0  | 40.8       | 38.5       |
| CVD Nurse                 | 23.3  | 25.4       | 26.9       |
| Other                     | 7.8   | 10.5       | 10.4       |
| <b>Sex</b>                |       |            |            |
| Male                      | 30.8  | 32.3       | 30.7       |
| Female                    | 69.2  | 67.8       | 69.3       |
| <b>Age class</b>          |       |            |            |
| 30-44                     | 17.9  | 14.7       | 13.6       |
| 45-54                     | 23.5  | 21.7       | 24.3       |
| 55-64                     | 27.3  | 31.9       | 32.0       |
| 65+                       | 31.4  | 31.7       | 30.2       |
| <b>Hypertension stage</b> |       |            |            |
| Normal                    | 26.4  | 38.6       | 41.7       |
| Stage I                   | 39    | 39.9       | 39.4       |

|    |                                     |       |       |       |
|----|-------------------------------------|-------|-------|-------|
| 1  |                                     |       |       |       |
| 2  |                                     |       |       |       |
| 3  | Stage II                            | 19.6  | 14.5  | 13.0  |
| 4  | Stage III                           | 14.9  | 7.1   | 5.9   |
| 5  |                                     |       |       |       |
| 6  | <b>Mean BP</b>                      |       |       |       |
| 7  | DBP                                 | 90.8  | 87.6  | 86.9  |
| 8  | SBP                                 | 149.0 | 143.3 | 141.2 |
| 9  |                                     |       |       |       |
| 10 | <b>Education</b>                    |       |       |       |
| 11 | No formal education                 | 37.0  | 32.3  | 31.4  |
| 12 | Primary                             | 41.7  | 43.1  | 45.6  |
| 13 | Secondary                           | 16.1  | 18.5  | 14.8  |
| 14 | Higher                              | 5.2   | 6.2   | 8.3   |
| 15 |                                     |       |       |       |
| 16 | <b>Ethnicity</b>                    |       |       |       |
| 17 | Akan                                | 4.2   | 28.6  | 21.4  |
| 18 | Dangme                              | 69.5  | 42.2  | 26    |
| 19 | Ewe                                 | 22    | 39.3  | 22.4  |
| 20 | Other or don't know                 | 4.3   |       |       |
| 21 |                                     |       |       |       |
| 22 | <b>Religion</b>                     |       |       |       |
| 23 | Christian                           | 96    | 97.6  | 97.9  |
| 24 | Muslim                              | 3.2   | 1.5   | 1.2   |
| 25 | Traditional                         | 0.5   | 0.4   | 0.3   |
| 26 | None                                | 0.3   | 0.5   | 0.6   |
| 27 |                                     |       |       |       |
| 28 | <b>Marital status</b>               |       |       |       |
| 29 | Never married                       | 5.7   | 5.1   | 3.6   |
| 30 | Married/Cohabiting                  | 54.4  | 54.7  | 57.7  |
| 31 | Separated/Divorced                  | 5.5   | 14.1  | 15.4  |
| 32 | Widowed                             | 26.1  | 25.9  | 23.1  |
| 33 | No response                         | 0.2   | 0.2   | 0.3   |
| 34 |                                     |       |       |       |
| 35 | <b>Household income</b>             |       |       |       |
| 36 | Less than 728 GHC                   | 18.7  | 17.0  | 17.2  |
| 37 | 728-1020 GHC                        | 17.4  | 20.8  | 19.8  |
| 38 | 1021-1098                           | 6.4   | 5.3   | 6.5   |
| 39 | 1099-1263                           | 5.0   | 4.9   | 4.7   |
| 40 | More than 1263 GHC                  | 12.3  | 11.1  | 11.8  |
| 41 | Don't know/no response              | 40.2  | 40.9  | 39.9  |
| 42 |                                     |       |       |       |
| 43 | <b>Aware of hypertension status</b> |       |       |       |
| 44 | Never had BP measured               | 18.7  | 17.6  | 16.3  |
| 45 | Was not aware                       | 12.9  | 11.4  | 10.7  |
| 46 | Aware                               | 68.5  | 70.8  | 73.1  |
| 47 |                                     |       |       |       |
| 48 | <b>Taking treatment</b>             |       |       |       |
| 49 | Never diagnosed                     | 31.5  | 29.2  | 26.9  |
| 50 | Diagnosed and no treatment          | 18    | 15.0  | 16.0  |
| 51 | Treatment                           | 50.3  | 55.6  | 56.8  |
| 52 | Don't know                          | 0.2   | 0.2   | 0.3   |
| 53 |                                     |       |       |       |
| 54 | <b>BMI</b>                          |       |       |       |
| 55 | Underweight (BMI <18.5)             | 5.4   | 4.9   | 5.0   |
| 56 | Normal weight (BMI 18.5-24.9)       | 43.7  | 44.8  | 43.2  |
| 57 | Overweight (BMI 25-29.9)            | 29.2  | 30.1  | 32.5  |
| 58 |                                     |       |       |       |
| 59 |                                     |       |       |       |
| 60 |                                     |       |       |       |

|                 |      |      |      |
|-----------------|------|------|------|
| Obese (BMI 30+) | 21.7 | 20.3 | 19.2 |
|-----------------|------|------|------|

\*All patients with hypertension enrolled in cohort

\*\*Patients with hypertension with six-month appointment/follow up

\*\*Patients with hypertension with a twelve-month appointment/follow up

#### Other risk factors:

5.4% of the sample was underweight, 43.7% was normal, 29.2% was overweight and 21.7% was obese. The mean BMI at enrolment in the cohort was 26.1 (95% CI 25.82, 26.4).

We did not analyse smoking, cholesterol or diabetes as only 1% of the sample were smokers, 3.5% reported having had a previous cholesterol test, and only 28% had a previous diabetes test.

#### Blood Pressure at enrolment

The average SBP was 147.2 (SD 22.1) mmHg, and average DBP was 89.9 (SD 13.3) mmHg. At enrolment 917 (68.5%) had a previous diagnosis of hypertension, of which 654 (71.3%) were already taking some anti-hypertensives, and 297 (32.4%) had their blood pressure under control.

#### Blood pressure management

Of the 1339 enrolled in the study, 712 (53.2%) did not come for a follow up (group A), 289 (21.6%) had only a six-month visit (group B), 75 (5.6%) had only the 12-month visit (group C) and 263 (19.6%) had both visits (group D). In total only 552 (41%) had a six month follow up appointment, and only 338 (25%) had a 12 month follow up appointment.

#### Loss to follow up and Characteristics of those who stayed in the study

Patients with their hypertension already under control were more likely to present for care. The variable that showed the greatest association with likelihood of having a six or twelve-month appointment was enrolment month. Participants who enrolled earlier were much more likely to stay in the programme than those who enrolled later (Table 1)

Multivariate analysis suggested that recruitment before 12 May 2016 (one year before the break in service), age, education and hypertension under control in the first visit showed significant associations with having a twelve-month appointment. Recruitment after 12 May 2016 reduced the chances of coming to further visits, the older the patient and the higher the education level, the higher the chances that the patient would come to the follow up visits. Patients with controlled HT at enrolment were nearly twice as likely to come to follow up visits. None of the other variables showed significant associations (Table 2).



Table 2) multivariate analysis of baseline characteristics associated with staying in the programme 12 months

|                                              | OR   | 95% CI       | P value          |
|----------------------------------------------|------|--------------|------------------|
| Enrolled year prior to break                 | 0.46 | (0.35, 0.60) | <b>0.00</b>      |
| Sex                                          | 0.88 | (0.63, 1.24) | 0.48             |
| Age (one year increments)                    | 1.01 | (1.00, 1.02) | <b>0.03</b>      |
| BMI                                          | 1.00 | (0.97, 1.02) | 0.90             |
| Edu. reference category: no formal education |      |              |                  |
| Primary education                            | 1.41 | (1.03, 1.93) | <b>0.03</b>      |
| Secondary Education                          | 1.13 | (0.73, 1.73) | 0.59             |
| Higher education                             | 2.42 | (1.33, 4.43) | <b>0.004</b>     |
| Reference cat: Never married                 |      |              |                  |
| Married/cohabitating                         | 1.77 | (0.90, 3.48) | 0.10             |
| Separated/Divorced                           | 1.86 | (0.90, 3.87) | 0.10             |
| Widowed                                      | 1.27 | (0.61, 2.64) | 0.52             |
| Household size                               | 1.01 | (0.95, 1.07) | 0.69             |
| Hypertension control                         | 1.93 | (1.47, 2.54) | <b>&lt;0.001</b> |
| Awareness of hypertension                    | 1.00 | (1.00, 1.00) | 0.97             |
| Hypertension treatment                       | 1.00 | (0.99, 1.00) | 0.33             |
| Any other previous diagnosis                 | 0.86 | (0.69, 1.07) | 0.18             |
| Confidence in management of hypertension     | 1.00 | (1.00, 1.01) | 0.63             |

### Changes in Blood Pressure

Because 12 month follow up was below 30%, we did not look at overall changes in blood pressure, but we did look at overall changes in blood pressure in those that remained in the study at six and twelve months.

On average, patients who enrolled and presented for a follow-up appointment at around six months had a 10.3 mmHg reduction in SBP (95% CI -12.0,-8.6) and a 6.3mmHg reduction in DBP (95% CI -7.2, -5.2) (Table 3). There was a greater reduction in those patients who had a follow up appointment at one year, when there was a 12.2 mmHg reduction (95% CI -14.4, -10.1) in SBP and a 7.5 mmHg (95% CI 9.9, 6.1) reduction in DBP after one year in the programme. Not all patients who had a 12 month appointment also had a six month appointment, 263 had both, and they had an 11.9 mmHg reduction (95% CI -14.3, -9.5) in SBP and 7.1 reduction (95% CI -8.6, -5.5) in DBP (Table 3).

### Knowledge of risk factors

Because of the poor retention, we were unable to comment on knowledge or risk factors.

Table-3) Changes in BP means and hypertension control by patterns of visits.

| Groups        | N    | Vis. | SBP          |                       | DBP         |                     | HT Control       |
|---------------|------|------|--------------|-----------------------|-------------|---------------------|------------------|
|               |      |      | Mean (SE)    | Mean dif. (95%CI)     | Mean (SE)   | Mean dif. (95%CI)   | % (95% CI)       |
| All patients  | 1339 | E    | 147.2 (0.60) |                       | 89.9 (0.36) |                     | 31% [29% , 34%]  |
|               | 552  | 6m   | 132.9 (0.80) | -10.3 [-12.0 , -8.6]  | 81.3 (0.47) | -6.3 [-7.3 , -5.2]  | 69% [65% , 73%]  |
|               | 338  | 12m  | 128.9 (1.05) | -12.2 [-14.4 , -10.1] | 79.4 (0.61) | -7.5 [-8.9 , -6.1]  | 72% [67% , 77%]  |
| (A) No visits | 712  | E    | 150.4 (0.85) |                       | 91.7 (0.49) |                     | 25% [21% , 28%]  |
| (B) Only 6m   | 289  | E    | 146.4 (1.28) |                       | 89.0 (0.77) |                     | 34% [29% , 40%]  |
|               |      | 6m   | 135.7 (1.15) | -10.1 [-13.2 , -8.1]  | 82.7 (0.68) | -6.3 [-7.8 , -4.8]  | 61% [55% , 67%]* |
| (C) Only 12m  | 75   | E    | 145.9 (2.62) |                       | 90.2 (1.63) |                     | 36% [25% , 48%]  |
|               |      | 12m  | 132.5 (2.56) | -13.5 [-18.5 , -8.6]  | 81.0 (1.38) | -9.2 [-12.4 , -6.0] | 71% [59% , 81%]* |
| (D) 6 & 12m   | 263  | E    | 139.8 (1.18) |                       | 86.1 (0.80) |                     | 43% [37% , 50%]  |
|               |      | 6m   | 129.8 (1.08) | -10.0 [-12.2 , -7.7]  | 79.8 (0.63) | -6.3 [-7.8 , -4.8]  | 77% [72% , 82%]* |
|               |      | 12m  | 127.9 (1.13) | -11.9 [-14.3 , -9.5]  | 79.0 (0.67) | -7.1 [-8.6 , -5.5]  | 72% [66% , 78%]* |

\* The comparison of these intervals with enrolment visit of the same group produce all p-values <0.0001

E= enrolment

There was also a significant reduction in hypertension stage, with a lower percentage of patients with hypertension having stage III hypertension over time (Table 4).

Table 4) Distribution of Hypertension Stage in each group in each visit.

The P-values are extracted from: (1) Chi-square tests to compare that row with group A of no follow-up. (2) from marginal homogeneity tests comparing the distribution of the same group in enrolment visit.

| Groups by patterns of visits | N     | Visit | No HT | Stage I | Stage II | Stage III | P-value     |
|------------------------------|-------|-------|-------|---------|----------|-----------|-------------|
| All patients                 | 1,339 | 1m    | 31.0% | 39.0%   | 18.4%    | 11.6%     |             |
|                              | 552   | 6m    | 68.7% | 19.7%   | 9.4%     | 2.2%      | < 0.001 (2) |
|                              | 338   | 12m   | 71.9% | 19.5%   | 6.5%     | 2.1%      | < 0.001 (2) |
| (A) No follow-up             | 712   | 1m    | 24.6% | 38.7%   | 21.5%    | 15.2%     |             |
| (B) Only 6m visit            | 289   | 1m    | 34.3% | 39.4%   | 17.0%    | 9.3%      | 0.002 (1)   |
|                              | 289   | 6m    | 60.9% | 24.2%   | 12.1%    | 2.8%      | <0.001 (2)  |
| (C) Only 12m visit           | 75    | 1m    | 36.0% | 36.0%   | 17.3%    | 10.7%     | 0.167 (1)   |
|                              | 75    | 12m   | 70.7% | 14.7%   | 10.7%    | 4.0%      | < 0.001 (2) |
| (D) 6 & 12m visit            | 263   | 1m    | 43.4% | 40.3%   | 11.8%    | 4.5%      | <0.001 (1)  |

|  |     |     |       |       |      |      |             |
|--|-----|-----|-------|-------|------|------|-------------|
|  | 263 | 6m  | 77.2% | 14.8% | 6.5% | 2.2% | < 0.001 (2) |
|  | 263 | 12m | 72.3% | 20.9% | 5.3% | 1.5% | < 0.001 (2) |
|  |     |     |       |       |      |      |             |

### Awareness

Overall awareness of hypertension status in the overall cohort was 68.5% at enrolment. Individuals who stayed in the programme longer, were more likely to be aware of their hypertension status. 70.8% of individuals who stayed in the programme for six months were aware of their hypertension status, and 73.1% of those who stayed in the programme for 12 months were aware of their hypertension status (Table 1).

### Treatment

Treatment increased between enrolment and six and twelve-month appointments. Although only 44.2% of patients were receiving any medication at enrolment, the majority were being treated at six months (90.4%) and at 12 months (92.2%). At enrolment, the majority of patients who were on treatment were taking a calcium channel blocker (CCB) (36% of all patients), but at six months the majority were on diuretics (75.9%) followed by a CCB (69.5%). The same pattern was found at 12 months with 79.8% taking diuretics, and 71.5% taking a CCB (Table 5)

In patients who had a six-month appointment, 24.1% were taking only one medication, 32% were taking two medications, and over 30% were taking more than two medications. In patients who had a 12-month appointment, 23 % were taking one medication, 32.6% were taking two medications, and over 32% were taking more than two medications.

Table 5) treatment pattern in the cohort at enrolment, six months and 12 months with p-values for differences.

| Treat         | Enrolment | 6 month | P change | 12 months | P change |
|---------------|-----------|---------|----------|-----------|----------|
| Diuretic      | 21.66%    | 75.89%  | 0.00000  | 79.83%    | <0.00001 |
| Calcium CB    | 36.07%    | 69.46%  | 0.00000  | 71.47%    | <0.00001 |
| Beta-blocker  | 3.14%     | 8.93%   | 0.00000  | 9.51%     | 0.00001  |
| ACE inhibitor | 6.72%     | 22.5%   | 0.00000  | 21.61%    | <0.00001 |
| ARB           | 2.54%     | 12.5%   | 0.00000  | 13.54%    | <0.00001 |
| Other         | 3.66%     | 15.89%  | 0.00000  | 17.87%    | <0.00001 |
| Any           | 44.29%    | 90.36%  | 0.00000  | 92.22%    | <0.00001 |

|               |        |        |         |        |          |
|---------------|--------|--------|---------|--------|----------|
| 0 medications | 55.71% | 9.64%  | 0.00000 | 7.78%  | <0.00001 |
| 1 medications | 19.42% | 24.11% | 0.21013 | 23.05% | 0.62722  |
| 2 medications | 20.46% | 31.96% | 0.00040 | 32.56% | 0.00811  |
| 3 medications | 4.18%  | 23.93% | 0.00000 | 24.78% | <0.00001 |
| 4 medications | 0.22%  | 6.96%  | 0.00000 | 8.07%  | <0.00001 |
| Mean          | 0.74   | 2.05   | 0.00000 | 2.14   | <0.00001 |

### *Control*

There was an increase in blood pressure control in patients who remained in the programme (Table 3), however patients who stayed in the programme were more likely to have their BP under control upon enrolment. In the group of patients that did not have a second appointment (group A) the baseline BP control was 25% while in the other groups (B, C, D) was 34%, 36% and 43% respectively. These differences were statistically significant (Table 4). The BP control increased to 69% (95% CI 65%-73%) in the individuals that visited at six months. In the patients that had the 12 month visit the control increased to 72% (95% CI 67%, 77%). Of patients who had both a six and 12-month follow-up appointment, the control increased to 77% (95% CI 72%-82%) at six months, but slightly decreased to 72% at 12 months (95% CI 66%-78%) (Table 3, Table 4).

## **DISCUSSION**

### **Summary of results**

Of the 1339 patients enrolled in ComHIP, only 552 (41%) had a follow up appointment at six months, and only 338 (25.2%) had a follow up appointment at twelve months, and 263 (20%) had both six and 12 month appointments. Participants who had more education, were older, had their hypertension under control at enrolment, or who had the opportunity to spend at least a year in the programme before the break in service were more likely to attend appointments at six and/or twelve months.

Among the group of patients who continued in the programme for six or twelve months, we found strong evidence of a reduction in DBP and SBP, and an increase (from under half to more than two thirds) of hypertension control. We also found strong evidence of an increase of the patients under treatment, of the number of medications received per patient, and a decrease in the number of individuals with severe hypertension.

### **Comparison with other studies**

Other studies evaluating task sharing for hypertension management have shown modest levels of success. For example, one randomised controlled study conducted in Ghana using task sharing (but with supplying free medications) showed greater reductions in SBP in patients randomised to the arm that included trained nurses, as compared to the one that just provided free medications and health insurance [11].

1  
2  
3 The poor follow-up reported in our study is not unexpected. Many studies have shown poor levels of  
4 follow up or adherence to clinic appointments. In one study conducted in three primary care clinics in  
5 Kibera, Kenya between 2010 and 2012, 1465 hypertensive or diabetic patients were identified. Of  
6 these 31% of patients were lost to follow up. Of these 55% of non-diabetic patients had their BP under  
7 control by 24 months, but only 28% of diabetic patients [12].  
8  
9

10 In another study conducted in Kibera, Kenya between 2015 and 2016, 3861 patients with hypertension  
11 were identified in health centres or clinics. of those 3069 patients did not complete six months of  
12 follow up (79%). Of those patients who remained in the programme over 6 months, they found 63%  
13 adherence to appointments [13].  
14

15 In a study conducted in the slums of Nairobi only 3.4% of participants showed completed compliance  
16 with the programme. 30% only showed up for one appointment, and 5% only had two visits. Similar  
17 to our study they found that patients who remained in the programme showed significant reductions  
18 in SBP and DBP [14].  
19  
20

21 In a study done in two sites (one rural and one urban) in Malawi, of 4075 patients referred for clinical  
22 care, only 61% attended their referral appointments. Of those 47% of patients with hypertension  
23 were still in contact after 24 months. Similar to our findings, they found uptake in care to be higher  
24 in older patients, being on anti-hypertensives prior to enrolment, and not being in employment.  
25 Unlike our study, they found that females were more likely to be retained in care .[15]  
26  
27

28 Similarly, a study of hypertensive and diabetic patients in rural Cameroon found that only 18.1% of  
29 participants were still in care after one year. However similar to our study they found significant  
30 decreases in SBP and DBP in patients with hypertension with at least two documented visits.  
31  
32  
33

### 34 **Strengths and Limitations**

35 A major strength of this study is unlike most other hypertension programmes ComHIP uses existing  
36 GHS protocols and medications and does not require outside funds or intervention for medications.  
37 This means that there is a much greater chance of long term sustainability of the programme as it  
38 does not rely on outside sources for medications.  
39  
40

41 Limitations of the study include that data were only available for encounters with service providers  
42 within the ComHIP network. Any appointments with doctors, pharmacists (licensed or un-licensed)  
43 that were not part of ComHIP would not have been registered, so it is possible that patients were  
44 obtaining anti-hypertensives from non-licensed sellers, which would not be captured in the ComHIP  
45 database. Another limitation of ComHIP was that the cohort did not have a control.  
46  
47

48 Due to the extremely poor follow-up, it is not possible to generalise our findings regarding the impact  
49 on blood pressure control to other studies, other than to emphasize the importance of effective  
50 strategies to promote follow-up. Finally, it is important to remember that nearly 70% of the initial  
51 cohort was aware of their hypertension status and about half were taking medications, which is a  
52 much higher proportion than in the general population. While this was done in ComHIP to ensure  
53 access to hypertension management to community members who otherwise would not have been  
54 able to access services, it is an important consideration when considering generalisability to the overall  
55 population.  
56  
57

### 58 **Interpretation**

59  
60

1  
2  
3 In the 25% of people who had a 12-month appointment, there was strong evidence of an increase of  
4 the patients receiving medications, the average number of medications received per patient, and the  
5 level of hypertension control, we also found a reduction in both BP and hypertension status. However,  
6 like most other studies in the region, the high loss to follow up highlights that innovative hypertension  
7 programmes such as ComHIP need to develop better ways to retain patients within the programme.  
8  
9

10 Community based hypertension programmes in resource poor setting often are complex to carry out,  
11 and are prone to poor follow-up. There are many possible reasons that follow up in our study was  
12 low.  
13

14 The factor most associated with retention in the programme was enrolment date. This is significant  
15 as due to operational issues, there was gap of CommCare utilization for three months. Anecdotally  
16 FHI 360 ComHIP staff learned that this gap in CommCare service had caused both service providers  
17 and staff to believe that the intervention had stopped, which may have resulted in a low rate of  
18 completion of follow-up appointments. Considering difficulties associated with community based  
19 studies in low resource settings, it is imperative to ensure continuity of service. Other factors that  
20 could cause this association may be health care professional fatigue; engaging patients to present for  
21 appointments may require considerable effort, such as multiple phone calls and personal interaction,  
22 for which the CVD nurses did not receive additional monetary compensation. It is possible that over  
23 time, the enthusiasm of the CVD nurses for the intervention may have waned. Also, as in any low –  
24 resource settings, there is a great deal of workforce turnover, FHI 360 recognised this early in the  
25 implementation and trained extra staff to bridge the gaps, however it is still possible that new health  
26 care providers who replaced them may not have had the same level of training. A complementary  
27 component of the evaluation which includes qualitative research with different ComHIP stakeholders  
28 is underway to analyse in depth the possible reasons that may have caused people to not adhere to  
29 the programme. (see Adler et al Barriers and facilitators to the implementation of a community-based  
30 hypertension improvement project in Ghana: A qualitative study and Laar et al Health system  
31 challenges to hypertension and related non-communicable diseases prevention and treatment:  
32 perspectives from Ghanaian stakeholders)  
33  
34  
35  
36  
37

38 Lastly, our study found that older individuals were more likely to continue in care, this was found in at  
39 least one other study[15] but was not reported on in most studies. This could be because older  
40 patients may have more time to attend clinics. Patients with their hypertension under control were  
41 about twice as likely to stay in the programme. This is not surprising as they had already exhibited  
42 better health seeking behaviours.  
43  
44

#### 45 **Recommendations:**

46 For patients enrolled and who continued in the programme we found an important impact on the  
47 management of hypertension and in blood pressure control. However, the high loss to follow-up of  
48 patients recruited limits the potential public health impact of these types of programmes. In order to  
49 minimize the impact of externalities (such as the CommCare service gap in ComHIP) programmes  
50 should have standard procedures and back-up systems to maximize the possibility that patients stay  
51 in the programme, particularly younger and less educated individuals. Also, appropriate incentives  
52 should be put in place to keep programme staff fully engaged and avoid programme fatigue. Future  
53 studies should further identify causes of loss to follow-up and find effective ways to adapt  
54 programmes accordingly (e.g. access to treatment within the community, targeted behaviour change  
55 messaging) to ensure that most of patients recruited stay long term in the programme. Future  
56 research may also want to focus on more difficult to reach patients who have lower levels of  
57 awareness and treatment on enrolment.  
58  
59  
60

### Acknowledgements

Funding for ComHIP was generously provided by the Novartis Foundation, Basel, Switzerland. We are grateful to all of cohort clients. We are also grateful to the leadership and political support of the Ghana Health Service (both from the national and district levels) for their support.

### Competing interests

Co-authors PL, AKL, PP, AJA, and DP-M worked on the ComHIP Programme for which their institutions (LSHTM and UGSPH) have received grants from the Novartis Foundation. Co-authors RD, RD, and DM are staff of the FHI360, which provided technical direction to ComHIP implementation.

### Authors' contributions

PL conceived of the project, PL and RD designed the interventions. PL, PP, AKL and AJA designed the research component of the project. DM, and RMMD supervised the implementation of the programme. RMMD is the programme data manager. AJA and DP-M performed the statistical analyses. AJA drafted the manuscript, with inputs from all authors. All authors read and approved the final version of the manuscript.

### Consent to publish

Participants' consent was obtained for the purposes of publishing the results from the study. All the authors consented to the study results to be published in the form presented in the final version of this manuscript.

### Data sharing

Summary statistics related to the dataset used in the project are available by request

### Funding

Funds for the project was made available by Novartis Foundation, Basel, Switzerland. They did not have any input or control over this manuscript.

### Figures

See attached supplementary file

### REFERENCES

1. Collaborators, G., *Global, regional, and national disability-adjusted life-years (DALYs) for 333 diseases and injuries and healthy life expectancy (HALE) for 195 countries and territories, 1990-2016: a systematic analysis for the Global Burden of Disease Study 2016*. *Lancet*, 2017. **390**(10100): p. 1260-1344.
2. WHO, *World Health Organization-International Society of Hypertension Guidelines for the Management of Hypertension. Guidelines Subcommittee*. *Am J Hypertens*, 1999. **17**(2): p. 151-83.
3. Collaboration, B.P.L.T.T., *Effects of blood pressure lowering on cardiovascular risk according to baseline body-mass index: a meta-analysis of randomised trials*. *The Lancet*, 2015. **385**(9971): p. 867-874.

- 1
- 2
- 3
- 4 4. Collins, R., et al., *Blood pressure and coronary heart disease*. Lancet, 1990. **336**(8711): p. 370-1.
- 5
- 6 5. Law, M.R., J.K. Morris, and N.J. Wald, *Use of blood pressure lowering drugs in the prevention of cardiovascular disease: meta-analysis of 147 randomised trials in the context of expectations from prospective epidemiological studies*. Bmj, 2009. **338**: p. b1665.
- 7
- 8 6. Olsen, M.H., et al., *A call to action and a lifecourse strategy to address the global burden of raised blood pressure on current and future generations: the Lancet Commission on hypertension*. Lancet, 2016. **388**(10060): p. 2665-2712.
- 9
- 10 7. Addo, J., L. Smeeth, and D.A. Leon, *Hypertension in sub-saharan Africa: a systematic review*. Hypertension, 2007. **50**(6): p. 1012-8.
- 11
- 12 8. Chow, C.K., et al., *Prevalence, awareness, treatment, and control of hypertension in rural and urban communities in high-, middle-, and low-income countries*. Jama, 2013. **310**(9): p. 959-68.
- 13
- 14 9. Lamptey, P., et al., *Evaluation of a community-based hypertension improvement program (ComHIP) in Ghana: data from a baseline survey*. BMC Public Health, 2017. **17**(1): p. 368.
- 15
- 16 10. GSS, *Population by Region, District, Locality of Residence, Age Groups and Sex, 2010*. Accra, Ghana: Ghana Statistical Service. [http://www.statsghana.gov.gh/docfiles/population\\_by\\_region\\_district\\_locality\\_of\\_residence\\_age\\_groups\\_and\\_sex\\_2010.pdf](http://www.statsghana.gov.gh/docfiles/population_by_region_district_locality_of_residence_age_groups_and_sex_2010.pdf). Accessed November 22, 2016 2012.
- 17
- 18 11. Ogedegbe, G., et al., *Health insurance coverage with or without a nurse-led task shifting strategy for hypertension control: A pragmatic cluster randomized trial in Ghana*. PLoS Med, 2018. **15**(5): p. e1002561.
- 19
- 20 12. Sobry, A., et al., *Caseload, management and treatment outcomes of patients with hypertension and/or diabetes mellitus in a primary health care programme in an informal setting*. Trop Med Int Health, 2014. **19**(1): p. 47-57.
- 21
- 22 13. Kuria, N., et al., *Compliance to follow up and adherence to medication in hypertensive patients in an urban informal settlement in Kenya: comparison of three models of care*. Trop Med Int Health, 2018.
- 23
- 24 14. Werner, M.E., et al., *Results of a hypertension and diabetes treatment program in the slums of Nairobi: a retrospective cohort study*. BMC Health Services Research, 2015. **15**: p. 512.
- 25
- 26 15. Musicha, C., et al., *Assessing clinical services and retention in care following screening for hypertension and diabetes among Malawian adults: an urban/rural comparison*. J Hypertens, 2016. **34**(11): p. 2172-9.
- 27
- 28
- 29
- 30
- 31
- 32
- 33
- 34
- 35
- 36
- 37
- 38
- 39
- 40
- 41
- 42
- 43
- 44
- 45
- 46
- 47
- 48
- 49
- 50
- 51
- 52
- 53
- 54
- 55
- 56
- 57
- 58
- 59
- 60



# Community-based Hypertension Improvement Project (COMHIP)

## Clinical Guidelines



09.2015

## SUMMARY

- ⊗ This clinical guideline on the management of Hypertension is intended to promote evidence-based management of hypertension in the community and thereby improve patient's clinical outcomes.
- ⊗ The guideline is intended to assist Licensed Chemical Sellers (LCS), Community Health Officers (CHOs), Cardiovascular Disease (CVD) Nurses and Physicians in the screening and diagnosis of HTN, determination of appropriate treatment, and delivery of individualized pharmacological and non-drug interventions.
- ⊗ This guideline is general for the ComHIP project and individualized guidelines have been developed for the various service delivery personnel matching their responsibilities.

## Table of Contents

|                                                                                                  |    |
|--------------------------------------------------------------------------------------------------|----|
| SUMMARY .....                                                                                    | 2  |
| 1.0 PROJECT DESCRIPTION .....                                                                    | 4  |
| 2.0 SUMMARY OF PERSONNEL ROLE .....                                                              | 5  |
| 3.0 SCREENING .....                                                                              | 6  |
| 3.1 Hypertension Definition and Classification .....                                             | 6  |
| 3.2 BP Screening Protocol .....                                                                  | 6  |
| 4.0 DIAGNOSIS AND EVALUATION .....                                                               | 7  |
| 4.1 Objectives of diagnostic evaluation .....                                                    | 7  |
| 4.2 Confirmation of hypertension diagnosis .....                                                 | 7  |
| 4.3 Grading of the Severity of Hypertension .....                                                | 7  |
| 4.4 Assessment for other CVD risk factors .....                                                  | 7  |
| 4.5 Assessment for Target Organ Damage or CVD Event .....                                        | 8  |
| 4.6 Assessment of Family History .....                                                           | 8  |
| 4.7 Assessment of ongoing CVD symptoms .....                                                     | 8  |
| 4.8 Anthropometric assessment .....                                                              | 8  |
| 4.81 Weight .....                                                                                | 8  |
| 4.82 Height .....                                                                                | 9  |
| 4.83 Waist Circumference .....                                                                   | 9  |
| 4.9 Assessment for signs of CVD .....                                                            | 10 |
| 4.10 Risk stratification .....                                                                   | 10 |
| 4.11 Laboratory Investigations .....                                                             | 11 |
| 5.0 MANAGEMENT, MONITORING AND FOLLOW UP .....                                                   | 12 |
| 5.1 BP Treatment Goal .....                                                                      | 12 |
| 5.2 Recommendations for Non-drug Treatment .....                                                 | 12 |
| 5.3 Recommendation for drug treatment .....                                                      | 12 |
| 5.4 Types of Antihypertensive drugs .....                                                        | 12 |
| 5.5 Titration of antihypertensive medications (CVD Nurses): Low and Moderate risk patients ..... | 13 |
| 5.6 Titration of antihypertensive medications (Physicians): High risk patients .....             | 13 |
| 5.7 General Prescribing Guideline .....                                                          | 14 |
| 5.8 Side Effect Monitoring .....                                                                 | 14 |
| 5.9 monitoring of response to treatment .....                                                    | 14 |
| 5.10 General dispensing Guideline (For LCS only) .....                                           | 15 |
| 5.11 Hypertensive Emergencies .....                                                              | 15 |
| 5.12 Referral SOP for CVD nurse .....                                                            | 15 |
| 5.13 Proposed activities for patients' visit .....                                               | 16 |
| 6.0 SCREENING AND DIAGNOSIS ALGORITHM .....                                                      | 17 |
| 7.0 MANAGEMENT FLOW ALGORITHM .....                                                              | 18 |
| 7.0 APPENDIX .....                                                                               | 19 |
| 7.1 Summary of GHS and NHIA approved drugs .....                                                 | 19 |
| 7.2 Drug Management Flow diagram for CVD nurses .....                                            | 20 |

## 1.0 PROJECT DESCRIPTION

☒ The community-based Hypertension Improvement Project (ComHIP), aims to improve hypertension management and control in Ghana. The project will test a community-based model that engages the private sector and utilizes information and communication technologies (ICTs) to enhance the capacity of the Ghana Health Service and individuals to control hypertension. There are four (4) categories of personnel (Figure 1) involved in service delivery in ComHIP. These are;

- Community Health Officers
- Licensed Chemical Sellers
- Cardiovascular disease nurses
- Physicians

☒ Community Health Officers (CHOs) will screen community members; Licensed Chemical Sellers (LCS) will screen clients and contribute to management and follow up of hypersensitive clients; cardiovascular nurses (CVD nurses) will be responsible for confirming hypertension diagnosis, grading and management of clients with mild and forms of hypertension; Physicians will be responsible mainly for managing severe hypertensive clients.

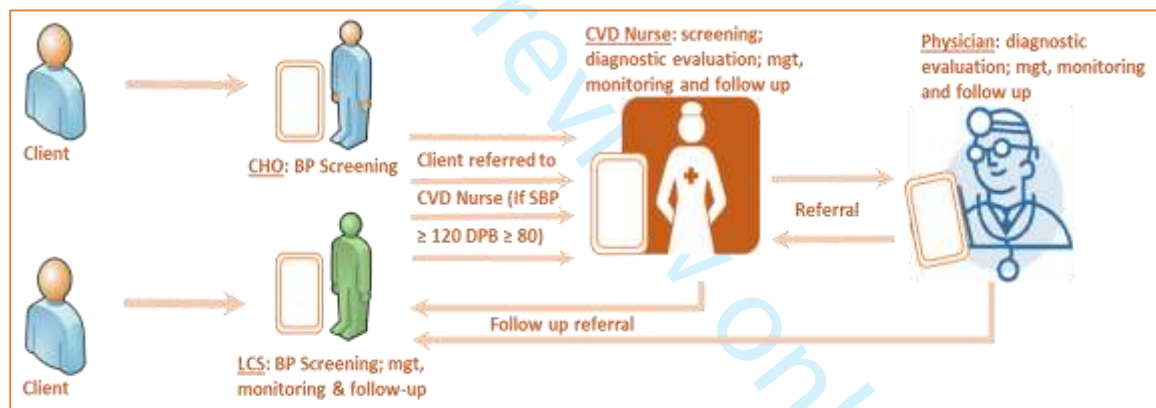

Figure 1: ComHIP Service delivery flow

☒ ComHIP involves the Ghana Health Service, FHI 360, London School of Hygiene and Tropical Medicine, University of Ghana School of Public Health, VOTO Mobile and with funding support from the Novartis Foundation. The project is for a period of 36 months.

## 2.0 SUMMARY OF PERSONNEL ROLE

☒ Table 1 summarizes the various functions of licensed chemical sellers (LCS), community health officers (CHOs), cardiovascular disease nurses and Physicians working in ComHIP.

Table 1: Summary of roles of various service delivery personnel

| Phase                                       | Activity                                | Community Health Officer | Licensed Chemical Seller | CVD Nurse | Physician |
|---------------------------------------------|-----------------------------------------|--------------------------|--------------------------|-----------|-----------|
| Phase 1: Screening                          | Community BP screening                  | Yes                      | Yes                      | No        | No        |
|                                             | Screening referral                      | Yes                      | Yes                      | No        | No        |
| Phase 2: Diagnostic Evaluation              | Confirmation of BP (HTN) diagnosis      | No                       | No                       | Yes       | Yes       |
|                                             | Staging of degree of HTN                | No                       | No                       | Yes       | Yes       |
|                                             | Assessment of other CVD risk factors    | No                       | No                       | Yes       | Yes       |
|                                             | Assessment of prevailing CVD symptoms   | No                       | No                       | Yes       | Yes       |
|                                             | Overall risk assessment/ Stratification | No                       | No                       | Yes       | Yes       |
|                                             | Assessment of family history of CVD     | No                       | No                       | Yes       | Yes       |
|                                             | Laboratory investigation                | No                       | No                       | Yes       | Yes       |
|                                             | Assessment of target organ complication | No                       | No                       | Yes       | Yes       |
|                                             | Assessment of Lifestyle Issues          | No                       | No                       | Yes       | Yes       |
|                                             | Diagnostic referral                     | No                       | No                       | Yes       | No        |
| Phase 3: Management, Monitoring & Follow Up | Baseline Anthropometry                  | No                       | No                       | Yes       | Yes       |
|                                             | Recommendation for drug treatment       | No                       | No                       | Yes       | Yes       |
|                                             | Medication Dispensing                   | No                       | Yes                      | No        | No        |
|                                             | Recommendation for Non-drug treatment   | Yes                      | Yes                      | Yes       | Yes       |
|                                             | Evaluation of drug side effects         | No                       | Yes                      | Yes       | Yes       |
|                                             | Monitoring of BP response to treatment  | No                       | Yes                      | Yes       | Yes       |
|                                             | Adherence Counselling                   | No                       | Yes                      | Yes       | Yes       |
|                                             | Anthropometric monitoring               | No                       | No                       | Yes       | Yes       |
| Regular follow up and interaction           | No                                      | No                       | Yes                      | No        |           |
| Management referral                         | No                                      | No                       | Yes                      | Yes*      |           |

\*In rare instances, certain patients may be referred by the Physician to a hypertension specialist

## 3.0 SCREENING

### 3.1 Hypertension Definition and Classification

Hypertension is used to refer to the level of blood pressure (BP) above which treatment does more good than harm. Numerically, hypertension is defined as a systolic blood pressure (SBP)  $\geq 140$  mmHg or a diastolic blood pressure (DBP) of  $\geq 90$  mmHg. The following BP classification has been adopted;

Table 2: Classification of blood pressure for adults aged  $\geq 18$  years

| BP Classification               | Systolic BP (mmHg) |     | Diastolic BP (mmHg) |
|---------------------------------|--------------------|-----|---------------------|
| Normal                          | <120               | and | <80                 |
| Pre-Hypertension*               | 120-139            | or  | 80-89               |
| Grade 1 Hypertension (Mild)     | 140-159            | or  | 90-99               |
| Grade 2 Hypertension (Moderate) | 160-179            | or  | 100-109             |
| Grade 3 Hypertension (Severe)   | $\geq 180$         | or  | $\geq 110$          |

\*Pre-hypertension: This refers to patients with very real risk of developing chronic high blood pressure

### 3.2 BP Screening Protocol

- A. Who should conduct screening?** LCS, Community Health Officer (CHO)
- B. Who is Eligible to be screened?** Any adult in the community 18 years and older excluding pregnant women.
- C. Where can Screening be done?** LCS will conduct screening at their shops. CHOs will conduct screening at CHPS compounds and during outreach/home visits.
- D. How should BP be measured?** All personnel involved in ComHIP should adopt simple techniques that minimize BP measurement errors: The following are recommended;
  - i. Ensure a quiet environment
  - ii. Patient must be rested for at least 5 minutes, quiet and comfortable.
  - iii. Patient must be seated with arm at heart level and feet flat on the floor
  - iv. Ensure that sleeves are rolled up or any tight clothing removed.
  - v. Ensure that the individual has not exercised, smoked or consumed foods, alcohol or drinks containing caffeine (such as tea or coffee) at least 30 minutes before measurements
  - vi. Ensure that client is not acutely ill or injured
  - vii. Use appropriate size cuff (E.g. too small a cuff can raise BP)
  - viii. Measure BP in both arms at first; then subsequently only measure in the arm which gave the higher reading.
  - ix. Each time BP is to be measured, 3 readings must be taken at least 3 minutes apart.
  - x. Refer to BP measurement guide whenever unsure.
- E. What to do with BP reading?**
  - I. All clients with BP  $\geq 140/90$  mmHg must be referred to CVD nurse. Clients with BP in the Pre-hypertension range must be counselled on lifestyle and encourage to check BP regularly.
  - II. For clients with BP  $\geq 180/110$  stress the need for urgent/immediate visit to a CVD nurse and arrange this visit with the CVD nurse.

⊗ Remember to explain to client that Screening is not diagnosis. Further investigation would be needed even if you suspect that the high BP may be hypertension.

## 4.0 DIAGNOSIS AND EVALUATION

### 4.1 Objectives of diagnostic evaluation

There are four key objectives in the assessment of a person with suspected hypertension are;

- 1) To confirm whether or not blood pressure is elevated
- 2) To document the presence or absence of blood pressure related target organ damage (e.g. left ventricular hypertrophy, hypertensive retinopathy, increased albumin: creatinine ratio);
- 3) To evaluate the person's cardiovascular risk either due to established cardiovascular disease or high cardiovascular disease risk states (e.g. diabetes or CKD), or by calculation of their 10 year CVD risk estimate
- 4) To consider whether there may be secondary causes for the hypertension.

### 4.2 Confirmation of hypertension diagnosis

**A. Who should confirm HTN diagnosis?** For most cases CVD nurse would confirm hypertension status and grade severity. In few instances, Physicians would do this for referred clients.

**B. How should BP (HTN) be confirmed?** The Following steps are recommended Use two measurements obtained two weeks apart.

- i. At each visit, take 3 BP readings and record the mean
- ii. Systolic equal or greater than 140 and or diastolic equal or greater than 90 (use mean of the readings obtained at the three separate visits)
- iii. For clients with initial BP in grade 3, CVD nurse must provide immediate starting dose and refer to physician

### 4.3 Grading of the Severity of Hypertension

**A. Who should grade severity of hypertension? Usually** CVD nurse will be responsible for grading patients, Physicians will confirm severe hypertension grade.

**B. How should HTN severity be graded?** Use [Table 2 \(page 6\)](#) to grade level of severity.

**C. Are there any referrals needed?**

- I. YES, CVD nurse must refer all patients with severe hypertension to a Physician.
- ☒ All confirmed patients 18-30yrs must be referred for further investigation by a physician to rule out possible secondary causes.

### 4.4 Assessment for other CVD risk factors

**A. Who should conduct assessment of CVD risk factors?** CVD nurse, Physician

**B. How should CVD risk factors be assessed?** A set of questions are useful in assessing CVD risk factors. Usually a Yes or No response is required from clients by asking the following;

- i. Have you had prior history of diabetes or hypertension?
- ii. Have you had prior history of elevated serum lipids
- iii. Do you currently smoke tobacco on a daily basis, less than daily, or not at all?
- iv. In a typical week, how many minutes do you spend engaging in vigorous/high intensity physical work, activities or exercises?
- v. Do you drink alcohol?
- vi. Have you had prior history of high cholesterol

#### 4.5 Assessment for Target Organ Damage or CVD Event

- A. Who should conduct assessment for TOD/CVD events?** CVD nurse, Physician
- B. How should TOD/CVD event assessment be done?** A yes or No responses are usually needed from patients upon asking the following questions;
- i. Have you had prior history of heart failure
  - ii. Have you had prior history of heart attack
  - iii. Have you had prior history of a stroke or Transient Ischemic Attack (Mini stroke)
  - iv. Have you had prior history of kidney failure or disease

#### 4.6 Assessment of Family History

- A. Who should conduct assessment of family history?** CVD nurse, Physician
- B. How should family history assessment be done?** Enquire from patient about history of any CVD event (stroke, heart attack) in parents and siblings; especially at age of less than 50.

#### 4.7 Assessment of ongoing CVD symptoms

- A. Who should conduct assessment of prevailing CVD symptoms?** CVD nurse, Physician
- B. How should ongoing CVD symptoms be assessed?** Enquire from patient to obtain a Yes or No answer using set of questions below;
- i. Ask about exertional dyspnea or at rest
  - ii. Ask about sleep disturbance by shortness of breath
  - iii. Ask about sleeping with more pillows of preference to sleep in a chair
  - iv. Ask about cough or wheezing during sleep.
  - v. Ask about excessive tiredness.
  - vi. Ask about central severe chest pain that disables the patient.
  - vii. Ask about feeling weak or wanting to faint
  - viii. Ask about palpitations
  - ix. Ask about loss of consciousness, vision, or speech.
  - x. Ask about weakness or numbness of one side of the body.
  - xi. Ask about swelling of feet and legs.

#### 4.8 Anthropometric assessment

- A. Who should conduct anthropometric measurements?** CVD nurse, Physician
- B. What anthropometric measurements should be assessed?** Weight, Height, Waist Girth. Calculate BMI
- C. When should measurements be taken?** Obtain accurate measurements during enrollment, thereafter every three months.
- D. How should anthropometric measurements be conducted?** Follow recommended techniques below for each assessment;

##### 4.81 Weight

This should be measured using a weighing scale. Follow the following steps;

- I. Before each measurement, make sure the scale is zero
- II. Ask the patient to remove heavy outer clothing (e.g. coats, jackets, shoes etc.)
- III. Ask the patient to stand motionless in the middle of the scale platform with the feet slightly apart and the body weight distributed equally on both feet.
- IV. Record body mass to nearest 0.1 Kg
- V. Ask patient to step off scale



- 1
- 2
- 3 VI. Repeat steps
- 4 VII. If the 2 measurements differ by more than 0.4 kg then repeat steps one more
- 5 VIII. If two measurement record the average value. If three measurements record the median
- 6 value.
- 7
- 8 IX. Refer to Weight measurement guide
- 9

#### 10 4.82 Height

11 This should be measured using a Stadiometer. Follow the following steps;

- 12
- 13 • Ask the subject to stand on the centre of the base with their back to the stadiometer
- 14 • Ask them to put their feet together and move back until their heels touch the bottom of
- 15 the stadiometer upright.
- 16 • Their buttocks and upper part of their back should also be touching the stadiometer
- 17 upright. Their head does not have to touch the stadiometer.
- 18 • The respondent's head should be in the Frankfort plane.
- 19 • This is achieved when the lower edge of the eye socket (the Orbitale) is horizontal with the
- 20 Trasion [see appendix 5.5].
- 21 • The vertex will be the highest point on their head. If their head is not aligned properly,
- 22 (and for most respondents it probably won't be), ask them to raise or lower their chin until
- 23 it is in the Frankfort Plane.
- 24 • When you are happy that the respondent is in the correct position, ask them to take a
- 25 deep breath and hold it.
- 26 • Lower the headboard until it is in contact with the head. Compress the hair if needed.
- 27 Make sure you don't bend the headboard from the horizontal, nor move the respondent's
- 28 head.
- 29 • Hold the headboard firmly at its final position and take the reading to the nearest 0.1 cm.
- 30 • When you have completed the reading, ask the respondent to step away from the
- 31 stadiometer.
- 32 • Record measurements immediately.
- 33 • Refer to height measurement guide for more details
- 34
- 35
- 36
- 37
- 38

#### 39 4.83 Waist Circumference

40 This should be measured using a tape measure. Follow the following steps;

- 41
- 42 • Ask the patient to place himself in the following manner: Clear the abdominal region, Feet
- 43 shoulder-width apart, Arms crossed over the chest
- 44 • It is suggested to kneel down to the right of the patient in order to measure waist girth;
- 45 palpate the patient's hips to locate the top of the iliac crest and Draw a horizontal line
- 46 halfway between the patient's back and abdomen.
- 47 • Place the measuring tape horizontally around the patient's abdomen. To work
- 48 comfortably, it is suggested to wrap the tape around the patient's legs and then move it
- 49 up.
- 50 • Align the bottom edge of the tape with your marked point. Gently tighten the tape around
- 51 the patient's abdomen without depressing the skin.
- 52 • It is suggested to request the patient to relax and breathe normally (abdominal muscles
- 53 should not be contracted). Ask the patient to take 2 or 3 normal breaths. Measure from
- 54 the zero line of the tape (to the nearest millimetre) at the end of a normal expiration
- 55
- 56
- 57
- 58
- 59
- 60

#### 4.9 Assessment for signs of CVD

**A. Who should conduct assessment for signs of CVD?** CVD nurse, Physician

**B. How should assessment for signs of CVD be conducted?**

- i. Note a significant difference ( $>15\text{mmHg}$ ) systolic BP in the arms (Nurse & Physician)
- ii. Listen to the neck for bruits (Physician)
- iii. Feel for irregularity of the radial pulse; also for rates greater than 100bpm. (Nurse & Physician)
- iv. Check for displacement of the apex beat. (Physician)
- v. Listen to the heart for normal and abnormal sounds (Physician)
- vi. Listen to the back of the chest for Crepitation (Physician)
- vii. Look and feel for swelling of the legs and feet (Nurse & Physician)

#### 4.10 Risk stratification

**A. Who should conduct overall risk assessment/stratification?** CVD nurse, Physician

**B. What are the general considerations to grade overall risk?** Make consideration of the following in grading overall patient risk.

- i. Consider the severity of the hypertension (Refer to table 3 below)
- ii. Consider the other CVD risk factors of the patient
- iii. Consider any target organ damage\*

Table 3: Grading of blood pressure values

| BP ranges   | Pre-Hypertension |             | Grade 1     | Grade 2        | Grade 3        |
|-------------|------------------|-------------|-------------|----------------|----------------|
|             | Normal           | High normal | SPB 140–159 | SPB 160–179    | SBP $\geq 180$ |
| SPB 120–129 | SPB 130–139      | DPB 90–99   | DBP 100–109 | DBP $\geq 110$ |                |
| DBP 80–84   | DPB 85–89        |             |             |                |                |

#### ⊗ Risk Factors

The following risk factors are included in the risk stratification.

- Men aged  $>55$  years
- Women aged  $>65$  years
- Smoking
- Dyslipidemia
- Family history of premature cardiovascular disease (men aged  $<55$  years, women aged  $<65$  years)
- Abdominal obesity (abdominal circumference  $\geq 102$  cm for men,  $\geq 88$  cm for women)

#### ⊗ Comorbidities

The following conditions are included where possible in the overall risk assessment;

- Cerebrovascular disease (TIA, stroke) (Nurse & Physician)
- Heart disease (angina, myocardial infarction, heart failure) (Nurse & Physician)
- Chronic renal disease (Nurse & Physician)
- Peripheral vascular disease (Physician)
- Diabetes (Nurse, Physician)

Table 4: CVD Risk stratification for patients

|                      |                                                                                                                                                                                     |
|----------------------|-------------------------------------------------------------------------------------------------------------------------------------------------------------------------------------|
| <b>High Risk</b>     | <ul style="list-style-type: none"> <li>• Grade 3 BP, with or without TOD, risk factors and Comorbidities</li> <li>• Grade 2 BP with TOD and/or +2 risk factors</li> </ul>           |
| <b>Moderate risk</b> | <ul style="list-style-type: none"> <li>• Grade 2 BP without TOD, &gt;2 risk factor or comorbidities</li> <li>• Grade 1 with TOD and/or &gt;2 risk factors, comorbidities</li> </ul> |
| <b>Low risk</b>      | <ul style="list-style-type: none"> <li>• Grade1 BP with no TOD, risk factors or co-morbidities</li> </ul>                                                                           |

**\*TOD** is used to refer to damage occurring in major organs fed by the circulatory system (heart, kidneys, brain, eyes) which can sustain damage due to uncontrolled hypertension. TOD will be assessed by history, physical examination and laboratory investigation. However, TOD will mainly be clinically determined as this will be the usual or expected level of care in the study area. Specific TODs will be assessed as below;

**a) Heart Failure criteria for assessment;**

- paroxysmal nocturnal dyspnea
- orthopnea
- nocturnal cough or wheezing
- sinus tachycardia
- leg and pedal edema
- Objective tests : ECG evidence of left ventricular hypertrophy (LVH)

**b) Kidney damage:**

- To be assessed with tests- proteinuria and serum creatinine or prior diagnosis of same. Subjective symptoms: Polyuria, nocturia, haematuria

**c) Brain damage:**

- To be clinically assessed- symptoms of stroke or prior documentation of a stroke.

**d) Eye damage**

- Examine the fundi for the presence of hypertensive retinopathy. Subjective signs: impaired vision

#### 4.11 Laboratory Investigations

**A. Who can order for laboratory investigation?** CVD nurse, Physician

**B. What laboratory investigations are recommended?**

- Physician should prioritize the following investigations;
  - I. Complete blood count
  - II. Fasting sugar, HbA1c, and lipids
  - III. Urinalysis
  - IV. Renal profile.
  - V. Electrocardiogram (ECG)
- CVD nurse should prioritize the following investigations;
  - I. ECG
  - II. Fasting blood sugar

**C. Laboratory prioritization for different risk profiles**

- Low Risk: ECG (Nurse)
- Moderate risk: Glucometer FBS, ECG (Nurse)
- High risk: Full range (Physician)

## 5.0 MANAGEMENT, MONITORING AND FOLLOW UP

### 5.1 BP Treatment Goal

- A. **Who should outline BP treatment goal?** CVD nurse, Physician
- B. **What BP treatment goal should be set for a patient?** The goal of treatment is to bring all patients to below 140/90mmHg

### 5.2 Recommendations for Non-drug Treatment

- A. **Who should make recommendations for non-drug treatment?** CVD nurse and Physicians should make recommendations, LCS should reinforce such recommendations
- B. **Who are the candidates for non-drug treatment?** Non-drug measures should be recommended for all clients diagnosed as pre-hypertensive and hypertensive.
- C. **What non-drug approaches should be recommended?** Prioritize the following;
  - i. Maintenance of Ideal body Weight
  - ii. Healthy low salt and Low fat diet
  - iii. Increased fruit and vegetable consumption
  - iv. No more than two drinks a day
  - v. No smoking
  - vi. Regular aerobic exercise; simple daily brisk walk for thirty minutes
  - vii. Adequate management of stress and anxiety levels

### 5.3 Recommendation for drug treatment

- A. **Who should make recommendations for drug treatment?** CVD nurse, Physician
- B. **Which clients are candidates for drug therapy?** All enrolled clients (BP  $\geq$ 140/90mmHg) are candidates for drug therapy supplemented with lifestyle modification irrespective of risk level.
- C. **Should treatment be initiated with monotherapy or multiple drugs?** The decision to begin with a single or dual drugs rests principally on the level at which the clients BP is above goal and on patients overall risk profile. Typically;
  - i. Begin with a SINGLE drug if BP <20/10mmHg above goal and in low risk patients.
  - ii. Begin with TWO drugs if BP >20/10mmHg above goal and in moderate and high risk patients.

### 5.4 Types of Antihypertensive drugs

- A. **What are the main drugs that can be prescribed?** Four (4) drugs are recommended to CVD nurses for starting treatment in eligible patients in the ComHIP study. Physicians will have wider options to address complex patients' needs. The recommended drugs are;
  - I. Diuretic: Bendroflumethiazide. -initial dose, 2.5mg daily. Maximum dose of 5mg daily.
  - II. Beta-blocker: Atenolol-initial dose of 50mg daily. Maximum dose of 100mg daily provided the heart rate is greater than 60/min on the lower dose.
  - III. Calcium channel blocker: Nifedipine retarde or XL -initial dose 30mg daily. Maximum dose of 60 to 90 mg daily.
  - IV. ACE Inhibitor: Lisinopril-initial dose of 20mg daily. Maximum dose of 30mg daily.

### 5.5 Titration of antihypertensive medications (CVD Nurses): Low and Moderate risk patients

- ⊗ The following steps should guide CVD nurses in the dose titration of hypertensive medications;

#### A. Patients with a difference between enrollment and goal BP that is less than 20/10mmHg

- Start with only bendrofluomethiazide. (See Appendix 7.2)
  - Add atenolol or nifedipine or Lisinopril if BP is greater than goal of 140/90 after three months of bendrofluomethiazide.
  - Wait for three more months and if BP is still greater than 140/90, increase the dosage of the atenolol or nifedipine or Lisinopril.
  - Wait for another three months and refer patient to a physician if BP is still greater than 140/90
- ⊗ Key point: For clients with BP < 20/10 above goal, typically they will undergo 9 months of therapy after which failure to attain BP goal will call for referral to a physician at hospital. However, referral may be made anytime if any complication or serious adverse effects occur within this 9-month period. Patient monitoring should be done every 6 weeks irrespective of whether change in therapy or not.

#### B. Patients with a difference between enrollment and goal BP that is greater than 20/10

- Start with bendro AND atenolol or nifedipine or Lisinopril
  - After three months if BP is greater than 140/90, increase the dosage of the atenolol or nifedipine or Lisinopril.
  - If BP remains greater than 140/90 three months later, then refer to physician.
- ⊗ Key point: For clients with BP ≥ 20/10 above goal, typically they will undergo 6 months of therapy after which failure to attain BP goal will call for referral to a physician at hospital. However, referral may be made anytime if any complication or serious adverse effects occur within this 9-month period. Patient monitoring should be done every 6 weeks irrespective of whether change in therapy or not.

### 5.6 Titration of antihypertensive medications (Physicians): High risk patients

- ⊗ The following steps should guide physicians in the selection and dose titration of hypertensive medications.

#### A. What drugs are available to physicians? All the classes of antihypertensive below;

- a) Diuretic: bendroflumethiazide.-2.5mg daily
- b) Calcium Channel Blocker (CCB): Amlodipine 5-10mg or Nifedipine (SR) 20-60mg daily
- c) Beta Blocker: Atenolol 50-100mg daily
- d) Angiotensin Converting Enzyme (ACE) Inhibitor: Lisinopril 10-30mg daily
- e) ARB: Losartan 50-100mg daily

- ⊗ Additional options like centrally acting agents, alpha blockers, aldosterone antagonist may be available to physicians

#### B. What are the acceptable and possible combinations? The possible combinations are

a+b; a+c; a+d; a+e; b+d; b+c; b+e

- The choice may be influenced by the presence of the patient's other medical conditions
- Titrate dose or add additional drug to lower the BP to goal.

### C. Recommendations for compelling indications

There is evidence to support the use or avoidance of certain antihypertensive when other conditions are present. These include the following;

Table 5: Compelling indications for individual drug classes

| compelling indications      | initial therapy options        |
|-----------------------------|--------------------------------|
| Heart Failure               | THIAZ, BB, ACEI, ARB, ALDO ANT |
| Post Myocardial Infarction  | BB, ACEI, ALDO ANT             |
| High CVD risk               | THIAZ, BB, ACEI, CCB           |
| Diabetes                    | THIAZ, BB, ACEI, ARB, CCB      |
| Chronic Kidney Disease      | ACEI, ARB                      |
| Recurrent Stroke Prevention | THIAZ,ACEI                     |

Keys: THIAZ=thiazide diuretic, ACEI=angiotensin converting enzyme inhibitors, ARB=angiotensin receptor blocker, BB=Beta-blocker, CCB=calcium channel blocker, ALDO ANT=aldosterone antagonist

#### 5.7 General Prescribing Guideline

- A. Who should prescribe antihypertensive medicines?** CVD Nurse, Physician
- B.** Before prescribing medicines confirm that patient agrees to be on medications
- C. How should prescriptions be written?** Follow the steps below;
  - i. written legibly in ink or otherwise so as to be indelible
  - ii. written by the prescriber (CVD Nurse, Physician) and not left for someone to complete
  - iii. should be dated
  - iv. The full name and address of the patient should be stated
  - v. Dosage form, generic name of medication, strength, dose and dosage schedule
  - vi. Exact quantity of medication to be supplied
  - vii. the signature of the prescriber(CVD nurse, Physician) (which should be in ink)

#### 5.8 Side Effect Monitoring

- A. Who should monitor side effects in patients?** CVD nurse, LCS, Physician
- B. What are the possible side effects of various medicines?** See below;
  - i. ACE Inhibitors: swelling of lips, tongue and throat; the patient must be advised to seek immediate medical help. They can cause irritating dry cough.
  - ii. Beta blockers: worsening or precipitation of asthma; bradycardia; worsening of HF
  - iii. Calcium channel blockers: edema of the feet
  - iv. Diuretic: low potassium leading to generalized weakness.

#### 5.9 monitoring of response to treatment

- A. Who should monitor clients' response to treatment?** CVD nurse, Physician, LCS
- B. What should be the monitoring priorities?** see key focus below
  - i. Aim for goal BP reading
  - ii. Monitor for side effects
  - iii. Check for adherence to the non-drug measures for BP control
  - iv. For resistant hypertension consider evaluation for interfering substances
  - v. Also consider specialty consultation for patients with resistant hypertension.

### 5.10 General dispensing Guideline (For LCS only)

#### A. Who should dispense medication? LCS

#### B. What checks should be done before dispensing medicines? LCS should ensure that;

- i. the prescription is legally valid, genuine and has not been altered after issuing
- ii. Each medicine on the prescription contain the dosage form, generic name, strength, dose, dosage schedule and quantity of medication to be supplied
- iii. The prescription is assessed for validity, safety and clinical appropriateness.

#### C. How should medicines be labelled? Each dispensed medication should be appropriately packaged and adequately labelled with the following minimum information:

- i. Name of the patient and the generic name of the medicine
- ii. Strength of the active ingredient and special instructions
- iii. Quantity of dispensed product
- iv. Complete dose regimen in written and/or graphic form
- v. Duration of use
- vi. Name and address of the LCS facility and dispenser
- vii. Date of dispensing

- ☒ Dispenser should always ensure that patient fully understands how the medication should be taken before leaving premises.

### 5.11 Hypertensive Emergencies

- ☒ Severe hypertension, usually BP > 180/110 mmHg in adults may be associated with acute neurological, cardiovascular or renal compromise, and could be fatal.

- If an LCS or CHO records BP reading for a client in this range, arrangements must be made immediately to see a CVD nurse must immediately administer oral hydralazine 10mg and refer to a physician. Arrange with the physician for the patient's visit
- Physician to administer hydralazine IV 5-10 mg slowly over 20 minutes. This dose may be repeated after 20-30minutes, until the patient is conscious and can take oral medications.

### 5.12 Referral SOP for CVD nurse

#### A. Mild/Moderate risk Patients

- All confirmed hypertensive clients' 18-30years should be referred to a physician for further investigation.
- All clients with suspected secondary causes should be referred to a Physician
- All mild and moderate hypertensive clients with no change in BP levels within the first 90 days (resistant hypertension) of treatment should be referred to a physician.
- Clients who have developed intolerable side effects should be referred
- All clients who develop hypertension-related complication should be referred to a physician
- All clients who show signs of target organ damage while under treatment should be referred to a physician.
- Any client who experiences a cardiovascular event while under treatment should be referred to a physician

#### B. High risk Patients

- All severe/high risk patients should be referred to a physician
- All clients with history of unstable stroke or cardiovascular event should be referred to a physician

### 5.13 Proposed activities for patients' visit

The following is aimed at helping CVD nurses determine what needs to be done at a patients visit.

Table 6: Patient Visits and proposed activities

| Visit Number          | When                                                                                                                                                                                                                                                                                         | Activity                                                                                                                                                                                                                                                                                                                                                                                                                                  |
|-----------------------|----------------------------------------------------------------------------------------------------------------------------------------------------------------------------------------------------------------------------------------------------------------------------------------------|-------------------------------------------------------------------------------------------------------------------------------------------------------------------------------------------------------------------------------------------------------------------------------------------------------------------------------------------------------------------------------------------------------------------------------------------|
| 1                     | After patient has been screened and referred by LCS, CHO                                                                                                                                                                                                                                     | CVD Nurse to recheck BP                                                                                                                                                                                                                                                                                                                                                                                                                   |
| 2                     | Two weeks after visit 1                                                                                                                                                                                                                                                                      | <ol style="list-style-type: none"> <li>1. CVD Nurse to recheck BP and confirm diagnosis</li> <li>2. Enroll patient, perform risk assessment, perform anthropometric measurements</li> <li>3. Refer to <b>Referral SOP for CVD nurse</b> for all patients that should be referred to Physician.</li> <li>4. Initiate treatment</li> <li>5. Order laboratory investigation as needed</li> <li>6. Perform Hypertension counseling</li> </ol> |
| 3                     | 6 weeks after visit 2                                                                                                                                                                                                                                                                        | <ol style="list-style-type: none"> <li>1. Re-check BP</li> <li>2. Assess treatment, perform counseling</li> </ol>                                                                                                                                                                                                                                                                                                                         |
| 4                     | 6 weeks after visit 3                                                                                                                                                                                                                                                                        | <ol style="list-style-type: none"> <li>1. Review treatment plan until goal is reached</li> <li>2. Perform anthropometric measurements every 3 months after enrollment</li> </ol>                                                                                                                                                                                                                                                          |
| 5 & subsequent visits | <ul style="list-style-type: none"> <li>• Every 3 months for patients with Mild Hypertension (treated by CVD nurse)</li> <li>• Every 2 months for patient with Moderate Hypertension (treated by CVD nurse)</li> <li>• Monthly for Patients with High (treated by Physicians only)</li> </ul> | <ol style="list-style-type: none"> <li>1. Re-check BP, review treatment, assess for risk factors, perform Hypertension counseling</li> <li>2. Conduct follow up assessment every 6 months after enrollment</li> </ol>                                                                                                                                                                                                                     |

view only



## 6.0 SCREENING AND DIAGNOSIS ALGORITHM



## 7.0 MANAGEMENT FLOW ALGORITHM



## 7.0 APPENDIX

### 7.1 Summary of GHS and NHIA approved drugs

| Class                    | Medicine                                       | Recommended in GHS treatment guideline | Available on NHIS Medicines List | Reimbursement NHIA cost (GHC) |
|--------------------------|------------------------------------------------|----------------------------------------|----------------------------------|-------------------------------|
| Diuretics                | Bendroflumethiazide 2.5mg                      | Yes                                    | Yes                              | 0.06/tab                      |
|                          | Bendroflumethiazide 5mg                        | No                                     | Yes                              | 0.06/tab                      |
|                          | Spironolactone 25mg                            | No                                     | Yes                              | 0.40/tab                      |
|                          | Spironolactone 50mg                            | No                                     | Yes                              | 0.70/tab                      |
| Beta-Blockers            | Atenolol 25mg                                  | Yes                                    | Yes                              | 0.10/tab                      |
|                          | Atenolol 50mg                                  | Yes                                    | Yes                              | 0.10/tab                      |
|                          | Atenolol 100mg                                 | Yes                                    | Yes                              | 0.13/tab                      |
|                          | Bisoprolol                                     | Yes                                    | No                               | n.a                           |
| ACE inhibitors           | Carvedilol                                     | Yes                                    | No                               | n.a                           |
|                          | Lisinopril 2.5mg                               | Yes                                    | Yes                              | 0.18/tab                      |
|                          | Lisinopril 5mg                                 | Yes                                    | Yes                              | 0.20/tab                      |
|                          | Lisinopril 10mg                                | Yes                                    | Yes                              | 0.25/tab                      |
|                          | Lisinopril 20mg                                | Yes                                    | Yes                              | 0.30/tab                      |
|                          | Ramipril 2.5mg<br>Ramipril 5mg                 | Yes<br>Yes                             | Yes<br>Yes                       | 0.22/tab<br>0.40/tab          |
| ARBs                     | Losartan 25mg                                  | Yes                                    | Yes                              | 0.36/tab                      |
|                          | Losartan 50mg                                  | Yes                                    | Yes                              | 0.50/tab                      |
|                          | Losartan 100mg                                 | Yes                                    | Yes                              | 1.0/tab                       |
|                          | Candesartan                                    | Yes                                    | No                               | n.a                           |
|                          | Valsartan                                      | Yes                                    | No                               | n.a                           |
| Calcium Channel Blockers | Nifedipine 10mg (capsule)                      | No                                     | Yes                              | 0.35/cap                      |
|                          | Nifedipine 10mg (SR)                           | Yes                                    | Yes                              | 0.21/tab                      |
|                          | Nifedipine 20mg (SR)                           | Yes                                    | Yes                              | 0.17/tab                      |
|                          | Nifedipine 30mg XL (GITS)                      | Yes                                    | Yes                              | 0.47/tab                      |
|                          | Amlodipine 5mg<br>Amlodipine 10mg              | Yes<br>Yes                             | Yes<br>Yes                       | 0.20/tab<br>0.30/tab          |
| Alpha Blockers           | Prazosin 500mcg                                | Yes                                    | Yes                              | 0.60/tab                      |
| Centrally acting agents  | Methyl dopa 250mg                              | Yes                                    | Yes                              | 0.25/tab                      |
| Vasodilators             | Hydralazine 25mg                               | Yes                                    | Yes                              | 0.70/tab                      |
| Combination therapies    | Atenolol + Hydrochlorothiazide (50+25mg)       | No                                     | Yes                              | 1.00/tab                      |
|                          | Atenolol + Hydrochlorothiazide (100mg +25mg)   | No                                     | Yes                              | 2.10/tab                      |
|                          | Lisinopril + Hydrochlorothiazide (10mg+12.5mg) | No                                     | Yes                              | 1.00/tab                      |
|                          | Lisinopril + Hydrochlorothiazide (20mg+12.5mg) | No                                     | Yes                              | 2.05/tab                      |
|                          |                                                |                                        |                                  |                               |

7.2 Drug Management Flow diagram for CVD nurses



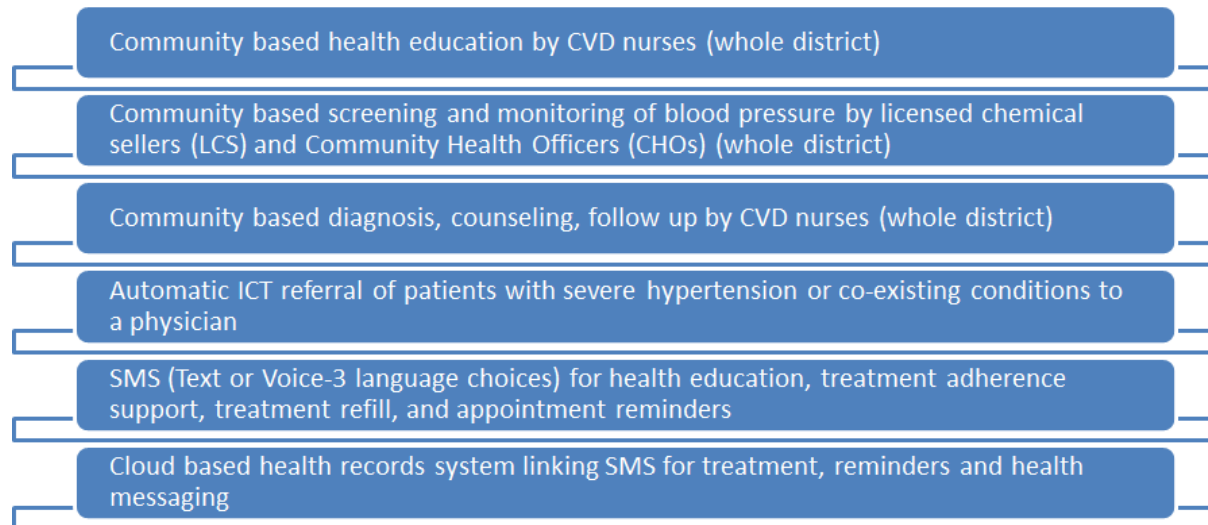

Supplementary figure 1) components of the ComHIP Programme

| Visit Number                     | When?                                                                                                                                                                                                                                                                                        | Activity                                                                                                                                                                                                                                                                                                                                                                                                                                  |
|----------------------------------|----------------------------------------------------------------------------------------------------------------------------------------------------------------------------------------------------------------------------------------------------------------------------------------------|-------------------------------------------------------------------------------------------------------------------------------------------------------------------------------------------------------------------------------------------------------------------------------------------------------------------------------------------------------------------------------------------------------------------------------------------|
| <b>1</b>                         | After patient has been screened and referred by LCS, CHO                                                                                                                                                                                                                                     | CVD Nurse to recheck BP                                                                                                                                                                                                                                                                                                                                                                                                                   |
| <b>2</b>                         | Two weeks after visit 1                                                                                                                                                                                                                                                                      | <ol style="list-style-type: none"> <li>1. CVD Nurse to recheck BP and confirm diagnosis</li> <li>2. Enroll patient, perform risk assessment, perform anthropometric measurements</li> <li>3. Refer to <i>Referral SOP for CVD nurse</i> for all patients that should be referred to Physician.</li> <li>4. Initiate treatment</li> <li>5. Order laboratory investigation as needed</li> <li>6. Perform Hypertension counseling</li> </ol> |
| <b>3</b>                         | 6 weeks after visit 2                                                                                                                                                                                                                                                                        | <ol style="list-style-type: none"> <li>1. Re-check BP</li> <li>2. Assess treatment, perform counseling</li> </ol>                                                                                                                                                                                                                                                                                                                         |
| <b>4</b>                         | 6 weeks after visit 3                                                                                                                                                                                                                                                                        | <ol style="list-style-type: none"> <li>1. Review treatment plan until goal is reached</li> <li>2. Perform anthropometric measurements every 3 months after enrollment</li> </ol>                                                                                                                                                                                                                                                          |
| <b>5 &amp; subsequent visits</b> | <ul style="list-style-type: none"> <li>• Every 3 months for patients with Mild Hypertension (treated by CVD nurse)</li> <li>• Every 2 months for patient with Moderate Hypertension (treated by CVD nurse)</li> <li>• Monthly for Patients with High (treated by Physicians only)</li> </ul> | <ol style="list-style-type: none"> <li>1. Re-check BP, review treatment, assess for risk factors, perform Hypertension counseling</li> <li>2. Conduct follow up assessment every 6 months after enrollment</li> </ol>                                                                                                                                                                                                                     |

Supplementary Figure 2. guidelines for patient visits

| Phase                                       | Activity                                | Community Health Officer | Licensed Chemical Seller | CVD Nurse | Physician |
|---------------------------------------------|-----------------------------------------|--------------------------|--------------------------|-----------|-----------|
| Phase 1: Screening                          | Community BP screening                  | Yes                      | Yes                      | No        | No        |
|                                             | Screening referral                      | Yes                      | Yes                      | No        | No        |
| Phase 2: Diagnostic Evaluation              | Confirmation of BP (HTN) diagnosis      | No                       | No                       | Yes       | Yes       |
|                                             | Staging of degree of HTN                | No                       | No                       | Yes       | Yes       |
|                                             | Assessment of other CVD risk factors    | No                       | No                       | Yes       | Yes       |
|                                             | Assessment of prevailing CVD symptoms   | No                       | No                       | Yes       | Yes       |
|                                             | Overall risk assessment/ Stratification | No                       | No                       | Yes       | Yes       |
|                                             | Assessment of family history of CVD     | No                       | No                       | Yes       | Yes       |
|                                             | Laboratory investigation                | No                       | No                       | Yes       | Yes       |
|                                             | Assessment of target organ complication | No                       | No                       | Yes       | Yes       |
|                                             | Assessment of Lifestyle Issues          | No                       | No                       | Yes       | Yes       |
|                                             | Diagnostic referral                     | No                       | No                       | Yes       | No        |
| Phase 3: Management, Monitoring & Follow Up | Baseline Anthropometry                  | No                       | No                       | Yes       | Yes       |
|                                             | Recommendation for drug treatment       | No                       | No                       | Yes       | Yes       |
|                                             | Medication Dispensing                   | No                       | Yes                      | No        | No        |
|                                             | Recommendation for Non-drug treatment   | Yes                      | Yes                      | Yes       | Yes       |
|                                             | Evaluation of drug side effects         | No                       | Yes                      | Yes       | Yes       |
|                                             | Monitoring of BP response to treatment  | No                       | Yes                      | Yes       | Yes       |
|                                             | Adherence Counselling                   | No                       | Yes                      | Yes       | Yes       |
|                                             | Anthropometric monitoring               | No                       | No                       | Yes       | Yes       |
|                                             | Regular follow up and interaction       | No                       | No                       | Yes       | No        |
| Management referral                         | No                                      | No                       | Yes                      | Yes*      |           |

Supplementary Table 1) Summary of roles of various service delivery personnel

\*In rare instances, certain patients may be referred by the Physician to a hypertension specialist

- I. Diuretic: Bendroflumethiazide. –initial dose, 2.5mg daily. Maximum dose of 5mg daily.
- II. Beta-blocker: Atenolol-initial dose of 50mg daily. Maximum dose of 100mg daily provided the heart rate is greater than 60/min on the lower dose.
- III. Calcium channel blocker: Nifedipine retarde or XL -initial dose 30mg daily. Maximum dose of 60 to 90 mg daily.

Supplementary Table 2) Recommended medications and dosages

STROBE Statement—checklist of items that should be included in reports of observational studies

|                              | Item No. | Recommendation                                                                                                                                                                             | Page No. |
|------------------------------|----------|--------------------------------------------------------------------------------------------------------------------------------------------------------------------------------------------|----------|
| <b>Title and abstract</b>    | 1        | (a) Indicate the study’s design with a commonly used term in the title or the abstract                                                                                                     | 1        |
|                              |          | (b) Provide in the abstract an informative and balanced summary of what was done and what was found                                                                                        | 2        |
| <b>Introduction</b>          |          |                                                                                                                                                                                            |          |
| Background/rationale         | 2        | Explain the scientific background and rationale for the investigation being reported                                                                                                       | 3-4      |
| Objectives                   | 3        | State specific objectives, including any prespecified hypotheses                                                                                                                           | 4        |
| <b>Methods</b>               |          |                                                                                                                                                                                            |          |
| Study design                 | 4        | Present key elements of study design early in the paper                                                                                                                                    | 5        |
| Setting                      | 5        | Describe the setting, locations, and relevant dates, including periods of recruitment, exposure, follow-up, and data collection                                                            | 5        |
| Participants                 | 6        | (a) <i>Cohort study</i> —Give the eligibility criteria, and the sources and methods of selection of participants. Describe methods of follow-up                                            | 5-6      |
|                              |          | <i>Case-control study</i> —Give the eligibility criteria, and the sources and methods of case ascertainment and control selection. Give the rationale for the choice of cases and controls |          |
|                              |          | <i>Cross-sectional study</i> —Give the eligibility criteria, and the sources and methods of selection of participants                                                                      |          |
|                              |          | (b) <i>Cohort study</i> —For matched studies, give matching criteria and number of exposed and unexposed                                                                                   |          |
|                              |          | <i>Case-control study</i> —For matched studies, give matching criteria and the number of controls per case                                                                                 |          |
| Variables                    | 7        | Clearly define all outcomes, exposures, predictors, potential confounders, and effect modifiers. Give diagnostic criteria, if applicable                                                   | 6        |
| Data sources/<br>measurement | 8*       | For each variable of interest, give sources of data and details of methods of assessment (measurement). Describe comparability of assessment methods if there is more than one group       | 6        |
| Bias                         | 9        | Describe any efforts to address potential sources of bias                                                                                                                                  | 6-7      |
| Study size                   | 10       | Explain how the study size was arrived at                                                                                                                                                  | 6-7      |

Continued on next page

|                        |     |                                                                                                                                                                                                                    |       |
|------------------------|-----|--------------------------------------------------------------------------------------------------------------------------------------------------------------------------------------------------------------------|-------|
| Quantitative variables | 11  | Explain how quantitative variables were handled in the analyses. If applicable, describe which groupings were chosen and why                                                                                       | 7     |
| Statistical methods    | 12  | (a) Describe all statistical methods, including those used to control for confounding                                                                                                                              | 7     |
|                        |     | (b) Describe any methods used to examine subgroups and interactions                                                                                                                                                | 7     |
|                        |     | (c) Explain how missing data were addressed                                                                                                                                                                        | 7     |
|                        |     | (d) <i>Cohort study</i> —If applicable, explain how loss to follow-up was addressed                                                                                                                                | 7     |
|                        |     | <i>Case-control study</i> —If applicable, explain how matching of cases and controls was addressed<br><i>Cross-sectional study</i> —If applicable, describe analytical methods taking account of sampling strategy |       |
|                        |     | (e) Describe any sensitivity analyses                                                                                                                                                                              |       |
| <b>Results</b>         |     |                                                                                                                                                                                                                    |       |
| Participants           | 13* | (a) Report numbers of individuals at each stage of study—eg numbers potentially eligible, examined for eligibility, confirmed eligible, included in the study, completing follow-up, and analysed                  | 7-8   |
|                        |     | (b) Give reasons for non-participation at each stage                                                                                                                                                               | 7-8   |
|                        |     | (c) Consider use of a flow diagram                                                                                                                                                                                 |       |
| Descriptive data       | 14* | (a) Give characteristics of study participants (eg demographic, clinical, social) and information on exposures and potential confounders                                                                           | 7-9   |
|                        |     | (b) Indicate number of participants with missing data for each variable of interest                                                                                                                                | 7-9   |
|                        |     | (c) <i>Cohort study</i> —Summarise follow-up time (eg, average and total amount)                                                                                                                                   | 7-9   |
| Outcome data           | 15* | <i>Cohort study</i> —Report numbers of outcome events or summary measures over time                                                                                                                                | 10-13 |
|                        |     | <i>Case-control study</i> —Report numbers in each exposure category, or summary measures of exposure                                                                                                               |       |
|                        |     | <i>Cross-sectional study</i> —Report numbers of outcome events or summary measures                                                                                                                                 |       |
| Main results           | 16  | (a) Give unadjusted estimates and, if applicable, confounder-adjusted estimates and their precision (eg, 95% confidence interval). Make clear which confounders were adjusted for and why they were included       | 8-14  |
|                        |     | (b) Report category boundaries when continuous variables were categorized                                                                                                                                          |       |
|                        |     | (c) If relevant, consider translating estimates of relative risk into absolute risk for a meaningful time period                                                                                                   |       |

Continued on next page



|                          |    |                                                                                                                                                                            |       |
|--------------------------|----|----------------------------------------------------------------------------------------------------------------------------------------------------------------------------|-------|
| Other analyses           | 17 | Report other analyses done—eg analyses of subgroups and interactions, and sensitivity analyses                                                                             | 10-14 |
| <b>Discussion</b>        |    |                                                                                                                                                                            |       |
| Key results              | 18 | Summarise key results with reference to study objectives                                                                                                                   | 14    |
| Limitations              | 19 | Discuss limitations of the study, taking into account sources of potential bias or imprecision. Discuss both direction and magnitude of any potential bias                 | 15    |
| Interpretation           | 20 | Give a cautious overall interpretation of results considering objectives, limitations, multiplicity of analyses, results from similar studies, and other relevant evidence | 16    |
| Generalisability         | 21 | Discuss the generalisability (external validity) of the study results                                                                                                      | 15    |
| <b>Other information</b> |    |                                                                                                                                                                            |       |
| Funding                  | 22 | Give the source of funding and the role of the funders for the present study and, if applicable, for the original study on which the present article is based              | 17    |

\*Give information separately for cases and controls in case-control studies and, if applicable, for exposed and unexposed groups in cohort and cross-sectional studies.

**Note:** An Explanation and Elaboration article discusses each checklist item and gives methodological background and published examples of transparent reporting. The STROBE checklist is best used in conjunction with this article (freely available on the Web sites of PLoS Medicine at <http://www.plosmedicine.org/>, Annals of Internal Medicine at <http://www.annals.org/>, and Epidemiology at <http://www.epidem.com/>). Information on the STROBE Initiative is available at [www.strobe-statement.org](http://www.strobe-statement.org).

1  
2  
3  
4  
5  
6  
7  
8  
9  
10  
11  
12  
13  
14  
15  
16  
17  
18  
19  
20  
21  
22  
23  
24  
25  
26  
27  
28  
29  
30  
31  
32  
33  
34  
35  
36  
37  
38  
39  
40  
41  
42  
43  
44  
45  
46  
47
