# Supplementary material for: Can a nurse-led community-based model of hypertension care improve hypertension control in Ghana? Results from the ComHIP cohort study
Source: PubMed Central journal article supplement — BMJ Open. 2019 Apr 2;9(4):e026799. doi: 10.1136/bmjopen-2018-026799 (PMC6500340; doi:10.1136/bmjopen-2018-026799), 2019-04-02
Supplement: bmjopen-2018-026799supp002.pdf [file bmjopen-2018-026799supp002.pdf]

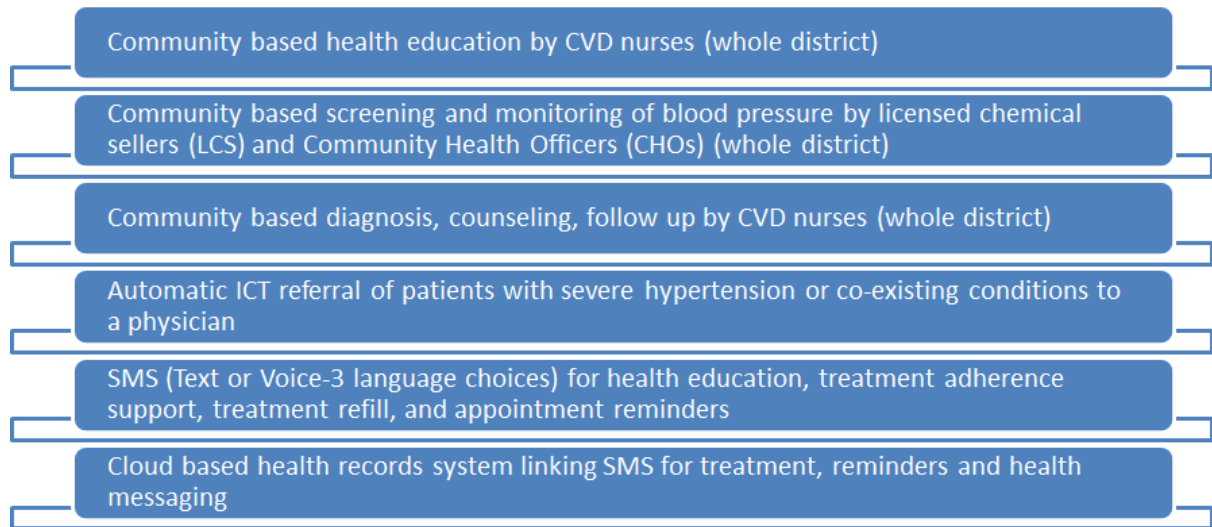

Supplementary figure 1) components of the ComHIP Programme

| Visit Number                     | When?                                                                                                                                                                                                                                                                                        | Activity                                                                                                                                                                                                                                                                                                                                                                                                                                  |
|----------------------------------|----------------------------------------------------------------------------------------------------------------------------------------------------------------------------------------------------------------------------------------------------------------------------------------------|-------------------------------------------------------------------------------------------------------------------------------------------------------------------------------------------------------------------------------------------------------------------------------------------------------------------------------------------------------------------------------------------------------------------------------------------|
| <b>1</b>                         | After patient has been screened and referred by LCS, CHO                                                                                                                                                                                                                                     | CVD Nurse to recheck BP                                                                                                                                                                                                                                                                                                                                                                                                                   |
| <b>2</b>                         | Two weeks after visit 1                                                                                                                                                                                                                                                                      | <ol style="list-style-type: none"> <li>1. CVD Nurse to recheck BP and confirm diagnosis</li> <li>2. Enroll patient, perform risk assessment, perform anthropometric measurements</li> <li>3. Refer to <i>Referral SOP for CVD nurse</i> for all patients that should be referred to Physician.</li> <li>4. Initiate treatment</li> <li>5. Order laboratory investigation as needed</li> <li>6. Perform Hypertension counseling</li> </ol> |
| <b>3</b>                         | 6 weeks after visit 2                                                                                                                                                                                                                                                                        | <ol style="list-style-type: none"> <li>1. Re-check BP</li> <li>2. Assess treatment, perform counseling</li> </ol>                                                                                                                                                                                                                                                                                                                         |
| <b>4</b>                         | 6 weeks after visit 3                                                                                                                                                                                                                                                                        | <ol style="list-style-type: none"> <li>1. Review treatment plan until goal is reached</li> <li>2. Perform anthropometric measurements every 3 months after enrollment</li> </ol>                                                                                                                                                                                                                                                          |
| <b>5 &amp; subsequent visits</b> | <ul style="list-style-type: none"> <li>• Every 3 months for patients with Mild Hypertension (treated by CVD nurse)</li> <li>• Every 2 months for patient with Moderate Hypertension (treated by CVD nurse)</li> <li>• Monthly for Patients with High (treated by Physicians only)</li> </ul> | <ol style="list-style-type: none"> <li>1. Re-check BP, review treatment, assess for risk factors, perform Hypertension counseling</li> <li>2. Conduct follow up assessment every 6 months after enrollment</li> </ol>                                                                                                                                                                                                                     |

Supplementary Figure 2. guidelines for patient visits

| Phase                                       | Activity                                | Community Health Officer | Licensed Chemical Seller | CVD Nurse | Physician |
|---------------------------------------------|-----------------------------------------|--------------------------|--------------------------|-----------|-----------|
| Phase 1: Screening                          | Community BP screening                  | Yes                      | Yes                      | No        | No        |
|                                             | Screening referral                      | Yes                      | Yes                      | No        | No        |
| Phase 2: Diagnostic Evaluation              | Confirmation of BP (HTN) diagnosis      | No                       | No                       | Yes       | Yes       |
|                                             | Staging of degree of HTN                | No                       | No                       | Yes       | Yes       |
|                                             | Assessment of other CVD risk factors    | No                       | No                       | Yes       | Yes       |
|                                             | Assessment of prevailing CVD symptoms   | No                       | No                       | Yes       | Yes       |
|                                             | Overall risk assessment/ Stratification | No                       | No                       | Yes       | Yes       |
|                                             | Assessment of family history of CVD     | No                       | No                       | Yes       | Yes       |
|                                             | Laboratory investigation                | No                       | No                       | Yes       | Yes       |
|                                             | Assessment of target organ complication | No                       | No                       | Yes       | Yes       |
|                                             | Assessment of Lifestyle Issues          | No                       | No                       | Yes       | Yes       |
|                                             | Diagnostic referral                     | No                       | No                       | Yes       | No        |
| Phase 3: Management, Monitoring & Follow Up | Baseline Anthropometry                  | No                       | No                       | Yes       | Yes       |
|                                             | Recommendation for drug treatment       | No                       | No                       | Yes       | Yes       |
|                                             | Medication Dispensing                   | No                       | Yes                      | No        | No        |
|                                             | Recommendation for Non-drug treatment   | Yes                      | Yes                      | Yes       | Yes       |
|                                             | Evaluation of drug side effects         | No                       | Yes                      | Yes       | Yes       |
|                                             | Monitoring of BP response to treatment  | No                       | Yes                      | Yes       | Yes       |
|                                             | Adherence Counselling                   | No                       | Yes                      | Yes       | Yes       |
|                                             | Anthropometric monitoring               | No                       | No                       | Yes       | Yes       |
|                                             | Regular follow up and interaction       | No                       | No                       | Yes       | No        |
| Management referral                         | No                                      | No                       | Yes                      | Yes*      |           |

Supplementary Table 1) Summary of roles of various service delivery personnel

\*In rare instances, certain patients may be referred by the Physician to a hypertension specialist

- I. Diuretic: Bendroflumethiazide. –initial dose, 2.5mg daily. Maximum dose of 5mg daily.
- II. Beta-blocker: Atenolol-initial dose of 50mg daily. Maximum dose of 100mg daily provided the heart rate is greater than 60/min on the lower dose.
- III. Calcium channel blocker: Nifedipine retarde or XL -initial dose 30mg daily. Maximum dose of 60 to 90 mg daily.

Supplementary Table 2) Recommended medications and dosages
